# Supplementary material for: Comparative Genomic Analysis of Capsule-Producing Black Yeasts Exophiala dermatitidis and Exophiala spinifera, Potential Agents of Disseminated Mycoses
Source: Front Microbiol. 2020 Apr 8;11:586. doi: 10.3389/fmicb.2020.00586 (PMC7179667; doi:10.3389/fmicb.2020.00586)
Supplement: Supplementary file 2 [file Table_2.xlsx]

## Sheet: orthogrous_and_annotation
Table S-2. Orthogroups and annotation analysis on the black yeasts compared in this study
ORTHOGROUP	GENE_NAME	IPR FAMILY	C. immunda (CBS 834.96)	E. spin (BMU 08022)	E. spin (BMU 00051)	E. spin (BMU 00047)	E. oligosperma (CBS 725.88)	E. derma (CBS 109144)	E. derma (CBS 115663)	E. derma (CBS 120473)	E. derma (CBS 132754)	E. derma (CBS 578.76)	E. phaeomuriformis	E. spin (CBS 101539)	E. spin (CBS 116557)	E. spin (CBS 123469)	E. spin (CBS 126013)	E. spin (CBS 131564)	E. derma NIH/UT8656	E. spin (CBS 899.68)	R. mack (CBS 650.93)	Total of genes
OG0000000	OTT_1508-like deaminase	IPR027796	0	20	20	18	0	2	2	2	2	1	0	3	7	10	12	8	0	2	3	112
OG0000001	Flavin-binding monooxygenase-like	IPR020946	10	7	6	7	5	2	2	2	2	2	2	12	8	6	8	10	2	9	4	106
OG0000002	Glycosyl transferase family group 2	IPR001173	3	6	6	6	10	3	3	3	3	3	3	6	6	6	6	6	3	6	1	89
OG0000003	Anticodon binding domain	IPR004154	4	6	7	5	3	2	2	2	2	2	2	6	8	8	6	6	2	7	3	83
OG0000004	Hydantoinase B/oxoprolinase	IPR003692	2	4	4	4	7	5	5	5	5	5	6	4	4	4	4	4	5	4	2	83
OG0000005	Heterokaryon incompatibility protein (HET)	IPR010730	7	5	8	6	4	2	2	0	2	0	0	6	4	10	4	6	0	7	6	79
OG0000006	Dehydratase family	IPR000581	3	6	6	6	4	1	1	1	1	1	1	6	6	6	7	7	1	6	5	75
OG0000007	Ctr copper transporter family	IPR007274	9	5	5	5	8	1	1	1	1	1	1	5	5	6	5	5	1	5	4	74
OG0000008	Amino acid permease	IPR004841	4	4	4	4	2	3	3	3	3	3	3	4	4	4	4	4	3	4	3	66
OG0000009	Major Facilitator Superfamily	IPR011701	7	7	3	4	2	1	1	1	1	1	1	3	3	4	4	4	1	3	14	65
OG0000010	Major Facilitator Superfamily	IPR011701	3	6	4	6	3	1	1	1	1	1	0	6	5	5	5	6	1	6	4	65
OG0000011	Phosphoenolpyruvate phosphomutase		7	3	5	5	3	1	1	0	1	0	0	5	5	5	5	5	1	5	6	63
OG0000012	CTD kinase subunit gamma CTK3	IPR024638	2	4	4	4	3	3	3	3	3	3	3	4	3	4	4	4	3	4	2	63
OG0000013	recQ family helicase		1	5	1	9	1	0	0	0	0	0	0	16	6	4	5	7	0	5	2	62
OG0000014	Sugar (and other) transporter	IPR005828	1	4	5	6	3	1	1	1	1	1	1	6	5	5	6	5	1	5	4	62
OG0000015	Major Facilitator Superfamily	IPR011701	1	7	5	5	3	1	1	1	1	1	1	5	8	5	5	5	1	5	1	62
OG0000016	alpha/beta-hydrolase	IPR000383|IPR005674|IPR008979|IPR013736|IPR029058	1	4	5	5	4	0	0	1	0	1	0	8	5	4	4	8	0	8	3	61
OG0000017	Conserved oligomeric complex COG6		4	3	2	2	3	6	4	4	4	4	4	2	2	2	2	2	4	2	3	59
OG0000018	FGGY family of carbohydrate kinases, C-terminal domain	IPR018485	3	3	3	3	4	3	3	3	3	3	3	3	3	3	3	3	4	3	2	58
OG0000019	alpha/beta hydrolase fold	IPR000073	0	5	5	5	3	2	1	1	1	1	1	5	5	5	5	5	1	5	2	58
OG0000020	Tetratricopeptide repeat	IPR011990	14	2	2	2	5	3	3	1	3	1	3	1	1	2	2	5	1	0	6	57
OG0000021	NmrA-like family	IPR008030	1	6	0	0	9	6	5	7	5	4	5	0	0	0	0	2	4	0	2	56
OG0000022	Glycosyl hydrolases family 16	IPR000757	1	4	4	4	4	2	2	2	2	2	2	4	4	4	4	4	2	4	0	55
OG0000023	FAD binding domain	IPR002938	3	2	2	2	3	4	3	3	3	3	3	3	3	3	3	3	3	3	3	55
OG0000024	MFS general substrate transporter	IPR001411|IPR036259	3	6	5	5	2	0	0	0	0	0	0	5	5	5	5	7	0	5	2	55
OG0000025	Protein of unknown function (DUF3435)	IPR021842	1	4	2	5	21	1	1	0	1	0	1	1	0	3	1	1	0	3	8	54
OG0000026	Ataxin 2 SM domain	IPR025852	14	2	3	2	2	2	2	2	2	2	2	2	3	3	2	2	2	2	2	53
OG0000027	DHH family	IPR001667	4	4	5	4	2	1	1	1	1	1	1	3	4	4	4	5	1	3	3	52
OG0000028	Amino acid permease	IPR002293	4	3	3	3	2	2	2	2	2	2	2	3	3	3	3	3	2	3	4	51
OG0000029	Cytochrome P450	IPR001128	2	3	3	3	1	4	2	2	2	2	3	4	3	3	4	3	2	3	2	51
OG0000030	Reverse transcriptase (RNA-dependent DNA polymerase)	IPR000477	0	0	0	0	0	2	2	0	2	0	0	16	5	6	8	9	0	0	1	51
OG0000031	Patatin-like phospholipase	IPR002641	3	5	1	3	6	5	3	5	3	0	2	3	0	3	3	1	1	3	0	50
OG0000032	Carbonic anhydrase	IPR001765	3	5	4	4	2	1	1	1	1	1	0	4	4	4	4	4	1	4	2	50
OG0000033	ATP dependent DNA ligase C terminal region	IPR012309	6	1	1	2	6	2	2	2	2	2	2	2	2	1	2	2	2	2	9	50
OG0000034	Heterokaryon incompatibility protein (HET)	IPR010730	6	4	3	2	2	1	1	1	1	0	1	3	3	4	3	4	0	3	7	49
OG0000035	Amidohydrolase family	IPR006680	4	1	3	3	3	2	2	2	2	2	2	3	2	3	3	3	2	2	5	49
OG0000036		IPR002347|IPR036291	2	5	5	5	4	0	0	0	0	0	0	4	5	4	4	5	0	5	1	49
OG0000037	Luciferase-like monooxygenase	IPR011251	4	2	2	2	3	3	3	3	3	3	3	2	2	2	2	2	3	2	3	49
OG0000038	BTB/POZ domain	IPR000210	4	2	4	3	2	2	1	1	1	1	1	4	4	4	4	6	1	4	0	49
OG0000039	Major Facilitator Superfamily	IPR011701	0	3	3	3	2	2	2	2	2	2	2	3	4	3	4	4	2	3	3	49
OG0000040	Cytochrome P450	IPR001128	7	2	2	2	3	2	1	1	1	1	1	2	2	3	2	2	1	2	10	47
OG0000041	Cupin domain	IPR013096	8	3	3	3	5	1	1	1	1	1	1	2	2	3	2	2	1	4	3	47
OG0000042	ABC transporter	IPR003439	1	4	4	4	2	1	1	1	1	1	1	4	5	4	3	4	1	4	1	47
OG0000043	Ubiquinone biosynthesis protein COQ7	IPR011566	0	4	3	3	4	2	2	2	2	2	1	3	3	3	4	3	2	4	0	47
OG0000044	Aldehyde dehydrogenase family	IPR015590	5	2	3	3	3	2	1	1	1	1	1	3	3	3	3	3	1	3	4	46
OG0000045	SUR7/PalI family	IPR009571	1	2	2	2	5	3	2	2	2	2	3	2	2	2	3	3	3	2	3	46
OG0000046	Flavin-binding monooxygenase-like	IPR020946	2	3	3	2	5	2	2	2	2	2	2	2	3	3	2	2	2	2	3	46
OG0000047	Fungal Zn(2)-Cys(6) binuclear cluster domain	IPR001138	0	1	1	0	5	5	3	6	3	6	3	1	0	0	0	3	7	2	0	46
OG0000048	Eukaryotic protein of unknown function (DUF829)	IPR008547	2	2	2	2	4	2	2	2	2	2	2	2	2	3	2	2	2	2	6	45
OG0000049	Carboxylesterase family	IPR002018	3	3	3	3	1	1	1	1	1	1	1	4	3	3	4	4	1	5	2	45
OG0000050	Multicopper oxidase	IPR001117	4	3	3	2	1	1	1	1	1	1	1	2	6	3	2	2	1	1	9	45
OG0000051	E1-E2 ATPase	IPR008250	2	1	1	1	7	5	4	4	5	0	4	1	1	1	1	1	3	1	2	45
OG0000052	Cupin domain	IPR013096	1	3	3	3	2	2	2	2	2	2	2	3	3	3	3	3	2	3	1	45
OG0000053	Acyl transferase domain	IPR014043	2	2	2	3	1	4	1	2	1	1	1	3	3	2	3	3	1	3	7	45
OG0000054	Acyltransferase	IPR002123	2	3	2	3	2	2	2	2	2	2	2	3	2	2	3	3	2	3	2	44
OG0000055	Alpha amylase, catalytic domain	IPR006047	3	2	2	2	5	2	2	2	2	2	2	2	3	2	2	2	2	1	4	44
OG0000056	RanBP1 domain	IPR000156	3	2	3	3	3	2	2	2	2	2	1	3	2	3	2	3	2	3	1	44
OG0000057	Heterokaryon incompatibility protein (HET)	IPR010730	3	3	3	3	2	2	1	1	1	1	1	3	3	3	3	3	1	3	4	44
OG0000058	Amino acid permease	IPR004841	4	3	3	3	4	1	1	1	1	1	1	3	3	3	3	3	1	3	2	44
OG0000059	Metallo-beta-lactamase superfamily	IPR001279	4	2	3	3	2	1	1	1	1	1	1	4	3	3	2	4	1	4	3	44
OG0000060	Aldehyde dehydrogenase family	IPR015590	4	3	3	3	1	1	1	1	1	1	1	3	4	3	3	3	1	4	3	44
OG0000061	LSM domain	IPR001163	1	3	3	2	4	2	2	2	2	1	2	3	3	3	3	3	1	3	1	44
OG0000062	Fungal specific transcription factor domain	IPR007219	2	3	5	3	2	1	1	1	1	1	1	3	3	4	3	3	1	3	2	43
OG0000063	FAD-binding domain	IPR013112	1	6	1	2	7	2	4	1	3	0	2	2	0	3	2	3	1	3	0	43
OG0000064	CENP-Q, a CENPA-CAD centromere complex subunit	IPR025212	4	3	3	1	4	1	1	1	1	1	1	1	3	3	3	3	1	1	7	43
OG0000065	SnoaL-like domain	IPR009959	1	4	3	4	0	1	1	1	1	1	1	4	4	3	4	4	1	4	1	43
OG0000066	2OG-Fe(II) oxygenase superfamily	IPR005123	2	2	1	3	0	2	2	1	2	2	2	3	3	2	3	3	2	3	4	42
OG0000067	Cytochrome P450	IPR001128	3	4	4	3	1	1	1	1	1	1	1	3	3	3	3	3	1	3	2	42
OG0000068	MA3 domain	IPR003891	2	3	3	4	1	1	1	1	1	1	1	4	4	3	3	4	1	4	0	42
OG0000069	CoA-transferase family III	IPR003673	1	3	3	3	2	1	1	1	1	1	1	3	4	3	3	3	1	3	4	42
OG0000070	Enoyl-(Acyl carrier protein) reductase		3	2	2	3	1	1	1	1	1	1	1	4	2	2	2	5	1	4	4	41
OG0000071	ABC transporter	IPR003439	1	3	3	3	4	2	1	1	1	1	1	3	3	3	3	3	1	3	1	41
OG0000072	bZIP transcription factor	IPR004827	1	2	2	2	8	2	2	1	2	1	2	2	2	2	2	2	2	2	2	41
OG0000073	Dienelactone hydrolase family	IPR002925	4	3	2	3	4	1	1	1	1	1	1	3	3	2	2	3	1	4	1	41
OG0000074	ADP-ribosylation factor family	IPR006689	1	3	3	3	3	1	1	1	1	1	1	3	4	3	4	3	1	3	1	41
OG0000075	4Fe-4S single cluster domain		1	2	2	2	1	4	2	2	2	2	1	3	3	3	3	3	1	3	1	41
OG0000076	BAR domain	IPR004148	1	2	2	2	11	2	2	1	2	1	2	2	1	2	1	3	2	2	0	41
OG0000077	Carboxylesterase family	IPR002018	0	3	3	3	3	1	1	1	1	1	1	3	3	3	3	4	1	3	3	41
OG0000078	Est1 DNA/RNA binding domain	IPR018834	7	3	1	1	9	1	1	1	1	1	1	2	1	1	2	2	1	3	1	40
OG0000079	Eukaryotic protein of unknown function (DUF846)	IPR008564	11	2	2	1	4	1	1	1	1	1	1	3	1	2	1	2	1	1	3	40
OG0000080	Enoyl-(Acyl carrier protein) reductase		2	2	2	2	2	2	1	2	1	2	1	3	2	2	2	3	2	2	5	40
OG0000081	Heterokaryon incompatibility protein (HET)	IPR010730	3	2	0	2	1	1	1	0	1	1	1	3	4	3	2	3	1	2	9	40
OG0000082		IPR010839|IPR025496	1	4	4	4	1	0	0	0	0	0	0	4	4	4	4	4	0	4	2	40
OG0000083	LamB/YcsF family	IPR005501	1	2	2	2	2	4	2	2	2	2	2	2	2	2	2	2	2	2	2	39
OG0000084	Acyl-CoA dehydrogenase, C-terminal domain	IPR009075	3	2	2	2	2	2	2	2	2	2	2	2	2	2	2	2	2	2	2	39
OG0000085	Phosphoenolpyruvate hydrolase-like	IPR009215	6	2	2	1	7	1	1	1	1	1	1	1	2	1	1	1	2	1	6	39
OG0000086	Major intrinsic protein	IPR000425	3	2	2	2	2	2	2	2	2	2	2	2	2	2	2	2	2	2	2	39
OG0000087	C-terminal domain of alpha-glycerophosphate oxidase	IPR031656	2	2	2	2	2	2	2	2	2	2	2	2	2	2	2	2	2	2	3	39
OG0000088	Epoxide hydrolase N terminus	IPR010497	2	2	2	2	2	2	2	2	2	2	2	2	2	2	2	2	3	2	2	39
OG0000089	14-3-3 protein	IPR023410	3	2	2	2	2	2	2	2	2	2	2	2	2	2	2	2	2	2	2	39
OG0000090	Catalase	IPR011614	4	2	2	3	2	1	1	1	1	1	1	3	2	2	2	4	1	2	4	39
OG0000091	AMP-binding enzyme	IPR000873	1	3	2	3	3	3	2	1	2	1	0	3	1	4	2	2	1	4	1	39
OG0000092	Fungal Zn(2)-Cys(6) binuclear cluster domain	IPR001138	1	3	3	3	0	1	1	1	1	1	1	4	3	3	3	2	2	4	1	38
OG0000093	ABC transporter	IPR003439	4	2	2	2	3	1	1	1	1	1	1	2	2	2	3	2	1	2	5	38
OG0000094	DEAD/DEAH box helicase	IPR011545	3	3	2	2	2	1	1	1	1	1	1	3	3	3	3	3	1	3	1	38
OG0000095	Amidase	IPR023631	1	3	1	1	3	1	1	1	1	1	1	3	3	3	3	3	1	3	4	38
OG0000096	GPR1/FUN34/yaaH family	IPR000791	5	2	3	2	2	1	1	1	1	1	1	2	2	3	2	3	1	2	3	38
OG0000097	Beta-lactamase superfamily domain		2	2	2	2	2	2	2	2	2	2	2	2	2	2	2	2	2	2	2	38
OG0000098	Alpha/beta hydrolase family	IPR000073	2	3	3	2	2	1	1	1	1	1	2	2	3	3	3	2	2	2	2	38
OG0000099	vegetative incompatibility protein HET-E-1	IPR001680|IPR007111|IPR011047|IPR015943|IPR017986|IPR018391|IPR019775|IPR020472|IPR027417|IPR036322	5	2	4	2	1	0	0	0	0	0	0	1	1	6	2	1	0	1	12	38
OG0000100	Proteasome subunit	IPR001353	1	3	2	5	10	1	1	0	1	0	0	2	0	2	1	2	0	5	2	38
OG0000101	RNA polymerase I-associated factor PAF67	IPR019382	2	2	2	2	2	2	2	2	2	2	2	2	2	2	2	2	2	2	2	38
OG0000102	Methyltransferase domain	IPR025714	1	3	2	2	2	2	2	2	2	2	2	2	2	2	2	3	2	2	1	38
OG0000103	Enoyl-(Acyl carrier protein) reductase		2	2	2	2	1	3	2	3	2	3	2	1	1	1	1	2	3	2	3	38
OG0000104	3-hydroxybenzoate 6-hydroxylase 1	IPR002938|IPR036188	1	4	3	4	0	0	0	0	0	0	0	4	4	4	4	4	0	4	2	38
OG0000105	Permease for cytosine/purines, uracil, thiamine, allantoin	IPR001248	2	3	3	3	1	2	1	1	1	1	1	3	3	3	3	3	1	3	0	38
OG0000106	FAD binding domain	IPR002938	6	1	1	1	2	2	2	2	2	2	2	1	1	1	1	1	3	1	5	37
OG0000107	Acyl CoA binding protein	IPR000582	4	1	2	3	2	1	1	1	1	1	1	3	3	2	3	3	1	2	2	37
OG0000108	ATPase family associated with various cellular activities (AAA)	IPR003959	2	2	2	2	1	2	2	2	2	2	2	2	2	0	3	3	3	2	1	37
OG0000109	Flavin-binding monooxygenase-like	IPR020946	6	2	2	3	4	1	1	1	1	1	1	1	1	2	1	4	1	2	2	37
OG0000110	transposase tan1-aspergillus niger	IPR004875	1	1	11	0	1	0	0	0	0	0	0	1	2	10	4	6	0	0	0	37
OG0000111	Protein kinase domain	IPR000719	1	1	1	1	7	3	2	4	2	4	2	1	1	0	1	1	4	1	0	37
OG0000112	Cytochrome P450	IPR001128	2	2	2	3	1	1	1	1	1	1	1	3	2	2	3	3	1	3	4	37
OG0000113	eRF1 domain 1	IPR005140	3	2	1	1	2	2	2	2	2	2	2	2	2	2	2	2	2	2	2	37
OG0000114	AAA-ATPase Vps4-associated protein 1	IPR013640	1	3	3	3	1	1	1	1	1	1	1	3	3	3	3	3	1	3	1	37
OG0000115			2	4	1	2	5	1	1	1	1	2	1	1	0	3	2	3	1	4	2	37
OG0000116	C6 zinc finger domain-containing protein	IPR001138|IPR036864	2	2	4	5	3	0	0	0	0	0	0	3	2	3	3	5	0	2	3	37
OG0000117	DNA photolyase	IPR006050	2	2	1	2	2	2	2	2	2	2	2	2	2	2	2	2	2	2	2	37
OG0000118	Aminotransferase class-V	IPR000192	1	3	3	3	1	1	1	1	1	1	1	3	3	3	3	3	1	3	1	37
OG0000119	Fungal specific transcription factor domain	IPR021858	2	3	2	2	3	1	1	1	1	1	1	3	1	2	3	3	2	3	2	37
OG0000120	Inhibitor of growth proteins N-terminal histone-binding	IPR024610	1	1	1	2	3	2	2	2	2	2	2	2	2	2	2	2	2	3	2	37
OG0000121	short chain dehydrogenase	IPR002347	1	1	2	2	3	2	2	2	2	2	2	2	2	2	2	2	2	2	2	37
OG0000122	Proprotein convertase P-domain	IPR002884	1	5	4	1	5	1	1	1	1	1	1	1	2	5	2	2	1	1	1	37
OG0000123	2OG-Fe(II) oxygenase superfamily	IPR005123	1	3	3	3	1	1	1	1	1	1	1	3	3	3	3	3	1	3	1	37
OG0000124	Acyl-CoA dehydrogenase, C-terminal domain	IPR009075	1	2	2	2	1	2	2	2	2	2	2	2	2	2	2	2	2	2	2	36
OG0000125	Acyl-CoA dehydrogenase, C-terminal domain	IPR009075	2	2	2	2	3	1	1	1	1	1	1	2	2	2	2	2	1	2	6	36
OG0000126	CDP-alcohol phosphatidyltransferase	IPR000462	1	3	3	2	2	1	1	1	1	1	1	3	3	3	3	4	1	2	0	36
OG0000127	40S ribosome biogenesis protein Tsr1 and BMS1 C-terminal	IPR007034	1	2	2	2	1	3	2	2	2	2	2	2	2	2	2	2	2	2	1	36
OG0000128	Amidohydrolase family	IPR006680	1	3	3	3	1	1	1	1	1	1	1	3	3	3	3	3	1	3	0	36
OG0000129	Flavin-binding monooxygenase-like	IPR020946	4	3	2	3	1	1	1	1	1	1	1	2	2	2	2	2	1	2	4	36
OG0000130	Acyltransferase family	IPR002656	0	2	2	2	2	3	2	2	2	2	2	2	2	2	2	2	2	2	1	36
OG0000131	Fungal-trans multi-domain protein	IPR001138|IPR007219|IPR036864	13	0	0	1	8	1	1	2	1	1	1	1	0	0	0	2	1	1	1	35
OG0000132	Alcohol dehydrogenase GroES-like domain	IPR013154	1	2	2	3	2	1	1	1	1	1	1	3	3	2	3	3	1	3	1	35
OG0000133	Chromate transporter	IPR003370	2	3	2	2	1	2	2	2	2	1	2	2	2	2	2	2	2	2	0	35
OG0000134	Fungal Zn(2)-Cys(6) binuclear cluster domain	IPR001138	1	1	3	4	4	2	2	2	2	2	2	0	1	3	0	1	2	1	2	35
OG0000135	short chain dehydrogenase	IPR002347	2	2	2	2	3	1	1	1	1	1	1	2	3	2	2	4	1	2	2	35
OG0000136	Erv1 / Alr family	IPR017905	1	2	2	2	1	2	2	2	2	2	2	2	2	2	2	2	2	2	1	35
OG0000137	Glucose-repressible protein Grg1	IPR020100	2	2	2	2	0	2	2	2	2	2	2	2	2	2	2	2	2	2	1	35
OG0000138	Sugar (and other) transporter	IPR005828	1	2	3	2	1	1	1	1	1	1	1	3	3	3	3	3	1	3	1	35
OG0000139	Rhodanese-like domain	IPR001763	0	3	3	3	1	1	1	1	1	1	1	3	3	3	3	3	1	3	0	35
OG0000140	Domain of unknown function (DUF4385)	IPR025494	0	1	2	2	3	2	2	2	2	2	2	2	2	2	2	2	2	2	1	35
OG0000141	Major Facilitator Superfamily	IPR011701	10	0	1	2	8	1	1	0	1	0	1	1	1	2	3	1	0	1	0	34
OG0000142	Alpha amylase, catalytic domain	IPR006047	2	1	1	1	6	1	1	1	1	1	1	3	2	3	1	3	1	2	2	34
OG0000143	Fungal specific transcription factor domain	IPR007219	3	2	2	2	2	2	2	2	2	2	2	1	1	1	1	1	2	2	2	34
OG0000144	DEAD/DEAH box helicase	IPR011545	4	2	2	2	1	1	1	1	1	1	1	2	2	2	2	3	1	2	3	34
OG0000145	Ankyrin repeat	IPR002110	2	1	0	1	1	4	3	3	3	2	3	1	1	1	2	2	2	1	1	34
OG0000146	DnaJ domain	IPR001623	2	0	1	2	2	2	2	2	2	2	2	2	2	2	2	2	2	2	1	34
OG0000147	Alcohol dehydrogenase GroES-like domain	IPR013154	3	1	1	1	6	1	1	1	1	1	1	2	2	2	2	2	1	3	2	34
OG0000148	FAD dependent oxidoreductase	IPR006076	1	2	1	1	3	3	2	3	2	3	2	1	1	1	1	1	3	1	2	34
OG0000149	nonribosomal peptide synthetase 12	IPR039261	1	3	2	4	2	1	1	1	1	1	0	3	1	3	2	2	1	4	1	34
OG0000150	FAD binding domain	IPR002938	2	1	2	2	3	1	1	1	1	1	1	3	2	2	1	6	1	2	1	34
OG0000151	2-oxoacid dehydrogenases acyltransferase (catalytic domain)	IPR001078	3	2	2	2	4	1	1	1	1	1	0	2	2	2	2	2	1	2	3	34
OG0000152	FAD binding domain	IPR002938	1	2	2	3	2	2	1	1	1	1	1	3	2	2	3	3	1	3	0	34
OG0000153	Amino acid permease	IPR004841	1	1	1	1	1	3	3	3	3	3	3	1	1	1	1	1	4	1	1	34
OG0000154	Cupin	IPR006045	1	2	1	2	1	2	2	2	2	2	2	2	2	2	2	2	2	2	1	34
OG0000155	short chain dehydrogenase	IPR002347	1	1	1	1	1	2	2	2	2	2	2	2	2	2	2	4	2	1	2	34
OG0000156	Alcohol dehydrogenase GroES-like domain	IPR013154	1	2	2	3	1	2	1	1	1	1	1	3	2	2	3	3	1	3	1	34
OG0000157	NADH:flavin oxidoreductase / NADH oxidase family	IPR001155	1	3	2	3	1	1	1	1	1	1	1	3	2	2	3	3	1	3	1	34
OG0000158	Major Facilitator Superfamily	IPR011701	0	2	2	2	2	2	2	2	2	2	2	2	2	2	2	2	2	2	0	34
OG0000159	C2H2 finger domain transcription factor	IPR013087	9	1	1	1	7	1	1	1	1	1	1	1	1	1	1	1	1	1	1	33
OG0000160	Catechol dioxygenase N terminus	IPR007535	6	3	1	1	1	1	1	1	1	1	1	2	2	1	4	2	1	1	2	33
OG0000161	Enoyl-(Acyl carrier protein) reductase		3	2	2	2	2	1	1	1	1	1	1	2	2	2	2	3	2	2	1	33
OG0000162	Major Facilitator Superfamily	IPR011701	3	2	2	2	1	1	1	1	1	1	1	2	2	3	3	2	2	2	1	33
OG0000163	Cytochrome P450	IPR001128	5	1	1	1	2	3	2	2	2	2	2	1	1	1	1	1	2	1	2	33
OG0000164	FtsJ-like methyltransferase	IPR002877	1	3	3	3	2	1	1	1	1	1	1	2	3	3	2	2	1	2	0	33
OG0000165	Sugar (and other) transporter	IPR005828	2	3	1	2	0	1	1	1	1	1	1	2	3	2	3	3	1	2	3	33
OG0000166	Protein of unknown function (DUF410)	IPR007317	4	2	2	2	2	1	1	1	1	1	1	2	2	2	2	2	1	2	2	33
OG0000167	ABC transporter	IPR003439	3	2	2	2	2	1	1	1	1	1	1	2	2	2	2	2	1	2	3	33
OG0000168	hypothetical protein PV08_08568	IPR007219|IPR010621|IPR010679	5	1	2	1	6	0	0	0	0	0	0	1	2	2	2	1	0	3	7	33
OG0000169	Amino acid permease	IPR004841	1	2	2	2	2	1	1	1	1	2	1	2	2	2	2	2	2	2	3	33
OG0000170	Ssl1-like	IPR007198	2	2	2	2	2	1	1	1	1	1	1	2	2	2	2	2	3	2	2	33
OG0000171	Fumarylacetoacetase N-terminal	IPR015377	1	2	2	3	1	1	1	1	1	1	1	3	2	2	2	3	1	3	2	33
OG0000172	Aldo/keto reductase family	IPR023210	1	2	2	3	2	1	1	1	1	1	1	3	2	2	2	3	1	3	1	33
OG0000173	DEAD/DEAH box helicase	IPR011545	2	2	2	1	2	2	2	1	2	2	2	1	2	2	2	2	2	1	1	33
OG0000174	recQ family helicase	IPR001650|IPR011545|IPR014001|IPR022698|IPR027417	0	13	0	12	0	0	0	0	0	0	0	2	0	0	0	2	0	4	0	33
OG0000175			0	2	3	5	0	0	0	0	0	0	0	4	4	3	4	4	0	4	0	33
OG0000176	CBS domain	IPR000644	0	6	2	0	3	3	2	2	3	0	1	1	0	2	1	3	1	3	0	33
OG0000177	NAD(P)-binding Rossmann-like domain		4	2	2	2	1	1	1	1	1	1	1	2	2	2	2	2	1	2	2	32
OG0000178	Alcohol dehydrogenase GroES-like domain	IPR013154	1	2	3	2	2	1	1	1	1	1	1	2	2	3	2	2	1	2	2	32
OG0000179	TPR domain protein	IPR002151|IPR002182|IPR011990|IPR019734|IPR027417	2	3	2	3	3	0	0	0	0	0	0	2	2	5	2	2	0	3	3	32
OG0000180	Patatin-like phospholipase	IPR002641	3	1	2	1	1	1	1	1	1	1	0	3	2	3	3	2	1	4	1	32
OG0000181	Aldehyde dehydrogenase family	IPR015590	2	3	2	2	3	1	1	1	1	1	1	2	2	2	2	2	1	2	1	32
OG0000182	Amidohydrolase family	IPR006680	1	2	1	2	3	2	1	1	1	1	1	2	2	2	2	2	1	2	3	32
OG0000183	Alcohol dehydrogenase GroES-like domain	IPR013154	3	2	2	2	2	1	1	1	1	1	1	2	2	2	2	2	1	2	2	32
OG0000184	Protein of unknown function (DUF1446)	IPR010839	2	2	2	2	1	1	1	1	1	1	1	2	3	2	2	2	1	3	2	32
OG0000185	CBS domain	IPR000644	1	1	1	2	2	2	1	2	1	2	1	3	3	1	1	2	1	3	2	32
OG0000186		IPR002347|IPR036291	1	3	3	3	2	0	0	0	0	0	0	3	3	3	3	3	0	3	2	32
OG0000187	N-terminal domain of oxidoreductase		2	2	2	3	1	1	1	1	1	1	1	3	2	2	2	3	1	2	1	32
OG0000188	Proteolipid membrane potential modulator	IPR000612	2	2	2	2	1	2	2	2	2	2	2	1	1	1	1	1	1	2	3	32
OG0000189	Berberine and berberine like	IPR012951	4	1	1	2	1	2	1	1	1	1	1	2	2	1	2	2	1	2	4	32
OG0000190	Class II Aldolase and Adducin N-terminal domain	IPR001303	3	1	1	1	1	3	2	2	2	2	2	1	2	1	1	1	2	1	3	32
OG0000191	Taurine catabolism dioxygenase TauD, TfdA family	IPR003819	2	2	2	2	2	1	1	1	1	1	1	2	2	2	2	2	2	2	2	32
OG0000192	Domain of unknown function (DUF4149)	IPR025423	7	1	1	1	6	1	1	1	1	1	1	1	1	1	1	1	3	1	1	32
OG0000193	Heterokaryon incompatibility protein (HET)	IPR010730	1	3	1	1	1	3	3	3	3	1	3	1	1	1	1	1	2	1	1	32
OG0000194	Fungal specific transcription factor domain	IPR007219	1	2	2	2	4	2	1	1	1	1	1	2	2	2	2	2	1	3	0	32
OG0000195	Protein of unknown function (DUF3767)	IPR022533	0	2	2	3	4	1	1	1	1	1	1	3	2	2	2	3	1	2	0	32
OG0000196	Amidase	IPR023631	0	2	2	3	2	1	1	1	1	1	1	3	2	2	2	3	1	3	1	32
OG0000197	Alcohol dehydrogenase GroES-like domain	IPR013154	0	2	2	2	1	2	2	2	1	2	2	2	2	2	2	2	2	2	0	32
OG0000198	Ankyrin repeats (3 copies)	IPR020683	1	2	2	2	2	2	1	1	1	1	1	2	2	2	2	4	1	2	0	31
OG0000199	Fungal specific transcription factor domain	IPR007219	3	2	2	2	1	1	1	1	1	1	1	2	2	2	2	2	1	2	2	31
OG0000200	Inorganic pyrophosphatase	IPR008162	3	1	1	1	3	2	2	2	2	2	2	1	2	1	1	1	2	1	1	31
OG0000201	Fumarylacetoacetate (FAA) hydrolase family	IPR011234	1	1	3	1	1	1	1	1	1	1	1	1	4	3	2	4	1	1	2	31
OG0000202	GDA1/CD39 (nucleoside phosphatase) family	IPR000407	3	2	2	2	2	1	1	1	1	1	1	2	2	2	2	2	1	2	1	31
OG0000203	Anticodon-binding domain of tRNA	IPR013155	2	3	2	2	1	1	1	1	1	1	1	2	1	2	2	2	1	2	3	31
OG0000204	FAD binding domain	IPR002938	2	1	2	2	2	1	1	1	1	1	1	2	3	2	2	3	1	2	1	31
OG0000205	2OG-Fe(II) oxygenase superfamily	IPR005123	3	2	2	2	2	1	1	1	1	1	1	2	2	2	2	2	1	2	1	31
OG0000206	Aldo/keto reductase family	IPR023210	1	2	1	1	1	3	3	1	3	1	2	2	1	1	2	2	1	2	1	31
OG0000207	Cytochrome P450	IPR001128	1	2	2	2	3	1	1	1	1	1	1	2	2	2	2	2	1	2	2	31
OG0000208	Helicase conserved C-terminal domain	IPR001650	1	2	3	2	1	1	1	1	1	1	1	2	3	3	2	2	1	2	1	31
OG0000209	4F5 protein family	IPR007513	1	2	2	2	4	1	1	1	1	1	1	2	2	2	2	2	1	2	1	31
OG0000210	Major Facilitator Superfamily	IPR011701	1	2	2	2	2	1	1	1	1	1	1	2	2	2	2	2	1	2	3	31
OG0000211	Multicopper oxidase	IPR001117	1	2	2	2	2	2	1	1	1	1	1	2	2	2	2	2	1	2	2	31
OG0000212	Major Facilitator Superfamily	IPR011701	3	2	2	1	3	1	1	2	1	2	1	1	1	1	2	2	2	1	2	31
OG0000213	Glycosyl transferase family 2	IPR001173	3	2	2	2	5	1	1	1	1	1	1	1	2	1	1	1	1	2	2	31
OG0000214	Thi4 family		4	1	1	1	4	1	1	1	1	1	1	2	2	2	2	2	1	2	1	31
OG0000215	ABC transporter	IPR003439	1	2	2	2	3	1	1	1	1	1	1	2	3	2	2	2	1	2	1	31
OG0000216	MmgE/PrpD family	IPR005656	3	2	2	2	1	1	1	1	1	1	1	2	2	2	2	2	1	2	2	31
OG0000217	related to HNM1-Choline permease	IPR000182|IPR002293|IPR016181	1	3	3	3	2	0	0	0	0	0	0	3	3	3	3	3	0	3	1	31
OG0000218	Helix-loop-helix DNA-binding domain	IPR011598	0	5	0	0	2	6	3	5	3	0	3	0	0	0	1	1	1	1	0	31
OG0000219	werner syndrome helicase, putative	IPR001650|IPR011545|IPR014001|IPR022698|IPR027417	3	13	0	0	0	0	0	0	0	0	0	0	0	0	0	11	0	2	1	30
OG0000220	Major Facilitator Superfamily	IPR011701	4	2	1	1	3	1	1	1	1	1	1	1	1	2	1	3	1	1	3	30
OG0000221	Erv1 / Alr family	IPR017905	1	2	2	2	2	1	1	1	1	1	1	2	2	2	2	3	1	2	1	30
OG0000222	Aminotransferase class I and II	IPR004839	1	4	2	2	1	1	1	1	1	1	1	2	2	2	2	2	1	2	1	30
OG0000223	Cytochrome c oxidase biogenesis protein Cmc1 like	IPR013892	2	1	2	2	2	1	1	1	1	1	1	2	2	2	2	2	1	2	2	30
OG0000224	ERCC4 domain	IPR006166	2	2	2	2	2	1	1	1	1	1	1	2	2	2	2	2	1	2	1	30
OG0000225	IBR domain, a half RING-finger domain	IPR002867	1	2	2	2	2	2	1	1	1	1	1	2	2	2	2	2	1	2	1	30
OG0000226	Translation initiation factor IF-3, C-terminal domain	IPR019815	1	2	2	2	2	1	1	1	1	1	1	2	1	2	2	3	1	2	2	30
OG0000227	ATPase family associated with various cellular activities (AAA)	IPR003959	2	1	1	1	3	2	2	2	2	2	2	1	1	1	1	1	2	1	2	30
OG0000228	AMP-binding enzyme	IPR000873	1	2	2	2	2	2	1	1	1	1	1	2	2	2	2	2	1	2	1	30
OG0000229	Arrestin (or S-antigen), N-terminal domain	IPR011021	2	2	2	2	2	1	1	0	1	0	1	2	2	2	3	3	0	2	2	30
OG0000230	Acetyltransferase (GNAT) family	IPR000182	1	2	2	2	2	1	1	1	1	1	1	2	2	2	2	2	1	2	2	30
OG0000231	Alpha/beta hydrolase family	IPR000073	2	2	2	2	3	1	1	1	1	1	1	2	1	2	2	2	1	2	1	30
OG0000232	X-Pro dipeptidyl-peptidase protein	IPR000383|IPR005674|IPR008979|IPR013736|IPR029058	2	3	2	2	4	0	0	1	0	1	0	2	4	2	2	2	0	2	1	30
OG0000233	Fungal specific transcription factor domain	IPR007219	2	2	2	2	1	1	1	1	1	1	1	2	2	2	2	2	1	2	2	30
OG0000234	Amino acid permease	IPR002293	3	2	1	2	1	1	1	1	1	1	1	2	2	2	2	2	1	2	2	30
OG0000235	short chain dehydrogenase	IPR002347	2	2	2	2	1	1	1	1	1	1	1	2	2	2	2	2	1	2	2	30
OG0000236	PLAC8 family	IPR006461	2	2	2	2	0	1	1	1	1	1	1	2	2	2	2	2	1	2	3	30
OG0000237	Aldehyde dehydrogenase family	IPR015590	1	2	2	2	2	1	1	1	1	1	1	2	2	2	2	2	1	2	2	30
OG0000238	Aminotransferase class-III	IPR005814	2	2	2	2	2	1	1	1	1	1	1	2	2	2	2	2	1	2	1	30
OG0000239	Haemolysin-III related	IPR004254	4	1	1	1	2	1	1	1	1	1	0	2	3	2	2	2	2	2	1	30
OG0000240	Cytochrome P450	IPR001128	3	1	1	1	0	3	1	1	1	1	1	1	1	1	2	2	1	1	7	30
OG0000241	EamA-like transporter family	IPR000620	2	2	2	2	1	1	1	1	1	1	1	2	2	2	2	2	1	2	2	30
OG0000242	Major Facilitator Superfamily	IPR011701	1	2	2	2	2	1	1	1	1	1	1	2	2	2	2	2	1	2	2	30
OG0000243	Major Facilitator Superfamily	IPR011701	1	2	2	1	2	1	1	1	1	1	1	2	2	2	2	3	1	2	2	30
OG0000244	Cytochrome P450	IPR001128	1	4	0	0	2	7	2	7	2	0	2	0	0	0	1	0	0	0	2	30
OG0000245	Flavin containing amine oxidoreductase	IPR002937	2	1	1	1	4	2	2	1	2	2	2	1	1	1	1	2	2	1	1	30
OG0000246	Enoyl-(Acyl carrier protein) reductase		1	2	2	2	1	1	1	1	1	1	1	2	3	2	2	2	1	2	2	30
OG0000247	PDZ-like domain	IPR025926	1	2	1	1	6	1	1	1	1	1	1	2	3	2	1	2	1	2	0	30
OG0000248	AMP-binding enzyme	IPR000873	2	2	1	3	1	1	1	1	1	1	1	3	1	1	2	3	1	1	3	30
OG0000249	hexose transporter	IPR003663|IPR005828|IPR005829|IPR020846|IPR036259	1	3	3	3	4	0	0	0	0	0	0	2	2	3	2	3	0	3	1	30
OG0000250	FAD binding domain	IPR002938	1	2	2	2	2	1	1	1	1	1	1	2	2	2	2	2	1	2	2	30
OG0000251	Fungal specific transcription factor domain	IPR007219	1	2	1	2	3	1	1	1	1	1	1	2	2	2	2	3	1	2	1	30
OG0000252	F-box-like	IPR001810	0	1	1	1	4	2	2	2	2	2	2	1	1	1	2	2	2	2	0	30
OG0000253	Cytochrome P450	IPR001128	7	1	1	1	1	2	1	1	1	1	1	1	2	1	1	1	1	1	3	29
OG0000254	Enoyl-(Acyl carrier protein) reductase		2	3	1	2	4	1	1	1	1	1	1	2	2	1	1	2	1	2	0	29
OG0000255	O-methylsterigmatocystin oxido	IPR001128|IPR002401|IPR036396	1	5	2	2	5	0	0	0	0	0	0	2	2	2	2	2	0	2	2	29
OG0000256	FAD binding domain	IPR002938	2	2	2	2	1	1	1	1	1	1	1	2	2	2	2	2	2	2	0	29
OG0000257	anhydro-N-acetylmuramic acid kinase	IPR005338	2	3	2	3	0	0	0	0	0	0	0	3	3	3	3	3	0	3	1	29
OG0000258	Amidase	IPR023631	1	2	2	2	1	1	1	1	1	1	1	2	2	2	2	2	1	2	2	29
OG0000259	Fungal specific transcription factor domain	IPR021858	2	2	2	1	2	1	1	1	1	1	1	2	2	2	2	1	1	2	2	29
OG0000260	CNH domain	IPR001180	2	2	3	1	3	1	1	1	1	1	1	1	2	3	1	1	1	1	2	29
OG0000261	Fip1 motif	IPR007854	5	1	1	1	1	3	1	1	1	1	1	1	2	1	1	1	1	2	3	29
OG0000262	Fungal specific transcription factor domain	IPR007219	5	1	0	1	4	2	1	1	1	1	1	1	2	0	2	2	1	1	2	29
OG0000263	Acetyltransferase (GNAT) domain		1	2	2	2	2	1	1	1	1	1	1	2	1	2	2	2	1	2	2	29
OG0000264	Dienelactone hydrolase family	IPR002925	2	1	1	2	2	1	1	1	1	1	1	2	3	2	2	2	1	2	1	29
OG0000265	Amidohydrolase family	IPR006680	1	2	2	2	2	1	1	1	1	1	1	2	2	2	2	2	1	2	1	29
OG0000266	3' exoribonuclease family, domain 1	IPR001247	2	2	2	2	1	1	1	1	1	1	1	2	2	2	2	2	1	2	1	29
OG0000267	AAA domain (Cdc48 subfamily)	IPR003959	2	2	2	2	1	1	1	1	1	1	1	2	2	2	2	2	1	2	1	29
OG0000268	Cytochrome P450	IPR001128	1	1	1	1	1	2	2	2	2	2	2	1	1	1	1	1	2	1	4	29
OG0000269	Fungal Zn(2)-Cys(6) binuclear cluster domain	IPR001138	1	1	2	3	0	3	2	2	2	2	2	2	1	1	1	1	2	1	0	29
OG0000270	Glutathione S-transferase, C-terminal domain		2	1	2	2	2	1	1	1	1	1	1	2	2	2	2	2	1	2	1	29
OG0000271	Fungal trichothecene efflux pump (TRI12)	IPR010573	2	2	3	1	3	2	1	1	1	1	1	1	1	3	1	1	1	1	2	29
OG0000272	Cobalamin synthesis protein cobW C-terminal domain	IPR011629	7	1	1	1	5	1	1	1	1	1	1	1	1	1	1	1	1	1	1	29
OG0000273	CDC24 Calponin	IPR010481	4	1	1	1	1	2	2	2	2	2	2	1	1	1	1	1	2	1	1	29
OG0000274	Sugar (and other) transporter	IPR005828	2	2	2	2	1	1	1	1	1	1	1	2	2	2	2	2	1	2	1	29
OG0000275	Aminotransferase class I and II	IPR004839	1	2	1	1	2	1	1	0	1	0	1	2	3	1	2	2	0	3	5	29
OG0000276	GTP cyclohydrolase II	IPR032677	1	2	2	2	1	1	1	1	1	1	1	2	2	2	2	2	2	2	1	29
OG0000277	Bacterial alpha-L-rhamnosidase	IPR008902	1	2	2	2	2	1	1	1	1	1	1	2	2	2	2	2	1	2	1	29
OG0000278	Dak1 domain	IPR004006	1	2	2	2	1	1	1	1	1	1	1	2	3	2	2	2	1	2	1	29
OG0000279	Glycosyl hydrolase family 76	IPR005198	1	2	2	2	2	1	1	1	1	1	1	2	2	2	2	2	1	2	1	29
OG0000280	ATP-NAD kinase	IPR002504	1	1	2	2	7	1	1	1	1	1	1	1	2	2	1	1	1	1	1	29
OG0000281	Membrane dipeptidase (Peptidase family M19)	IPR008257	2	1	1	1	2	2	2	2	2	2	2	1	1	1	1	1	2	1	2	29
OG0000282	Alpha amylase, catalytic domain	IPR006047	1	2	2	2	2	1	1	1	1	1	1	2	2	2	2	2	1	2	1	29
OG0000283	Common central domain of tyrosinase	IPR002227	1	2	2	1	3	1	1	1	1	1	1	2	2	1	2	2	2	2	1	29
OG0000284	Methyltransferase domain	IPR025714	1	2	2	2	3	1	1	1	1	0	1	2	2	2	2	2	1	2	1	29
OG0000285	CAF1 family ribonuclease	IPR006941	2	2	2	2	1	1	1	1	1	1	1	2	2	2	2	2	1	2	1	29
OG0000286	Alcohol dehydrogenase GroES-like domain	IPR013154	1	2	2	2	1	1	1	1	1	1	1	2	2	2	2	2	1	2	2	29
OG0000287	Homeobox KN domain	IPR008422	1	2	2	1	2	2	1	1	1	1	1	2	2	2	2	2	1	2	1	29
OG0000288	Pyridine nucleotide-disulphide oxidoreductase		1	2	2	2	2	1	1	1	1	1	1	2	2	2	2	2	1	2	1	29
OG0000289	60s Acidic ribosomal protein		2	1	2	1	2	2	2	2	2	2	2	1	1	1	1	1	2	1	1	29
OG0000290	Major Facilitator Superfamily	IPR011701	1	2	2	2	2	1	1	1	1	1	1	2	2	2	2	2	1	2	1	29
OG0000291	Mo-co oxidoreductase dimerisation domain	IPR005066	3	2	2	2	1	1	1	1	1	1	1	2	2	2	2	2	1	2	0	29
OG0000292	Metallo-beta-lactamase superfamily	IPR001279	2	2	1	2	1	1	1	1	1	1	1	2	2	2	2	2	1	3	1	29
OG0000293	Cupin-like domain		3	4	2	2	3	1	1	1	1	1	1	1	1	1	1	1	1	2	1	29
OG0000294	Protein of Unknown function (DUF1690)	IPR012471	1	2	1	2	1	1	1	1	1	1	1	2	2	2	2	2	1	2	3	29
OG0000295	ABC transporter	IPR003439	1	1	1	1	1	2	2	2	2	2	2	1	1	1	1	3	2	1	2	29
OG0000296	Protein kinase domain	IPR000719	0	2	3	1	3	1	1	1	1	1	1	2	2	3	2	2	1	2	0	29
OG0000297	putative gibberellin 20 oxidase	IPR005123|IPR026992|IPR027443	0	3	3	3	1	0	0	0	0	0	0	3	3	3	3	3	0	3	1	29
OG0000298	Protein kinase domain	IPR000719	0	1	1	1	2	3	3	3	3	3	3	0	0	2	0	0	3	1	0	29
OG0000299	Fungal specific transcription factor domain	IPR007219	0	1	1	1	0	2	1	3	1	2	1	1	2	1	1	1	1	1	8	29
OG0000300	hypothetical protein PV08_03269	IPR009057	1	4	4	3	1	0	0	0	0	0	0	0	2	1	2	7	0	2	1	28
OG0000301	Alcohol dehydrogenase GroES-like domain	IPR013154	3	1	1	1	2	1	1	1	1	1	1	2	2	2	2	2	1	2	1	28
OG0000302	3-oxoacyl-[acyl-carrier-protein] reductase	IPR002347|IPR020904|IPR036291	4	2	1	3	5	0	0	0	0	0	0	3	1	1	1	3	0	2	2	28
OG0000303	Cupin-like domain		2	1	1	1	2	1	1	1	1	1	1	2	2	2	2	2	1	3	1	28
OG0000304	Fungal specific transcription factor domain	IPR021858	1	2	2	2	1	1	1	1	1	1	1	2	2	2	2	2	1	1	2	28
OG0000305	4Fe-4S dicluster domain	IPR017896	1	2	2	2	0	1	1	1	1	1	1	2	2	2	2	2	1	2	2	28
OG0000306	Fungal specific transcription factor domain	IPR007219	3	1	2	1	1	1	1	1	1	1	1	2	2	2	2	2	1	2	1	28
OG0000307		IPR008775	1	2	2	2	2	0	0	2	0	2	0	3	2	2	2	3	0	3	0	28
OG0000308	Alpha/beta hydrolase family	IPR000073	1	2	2	2	1	1	1	1	1	1	1	2	2	2	2	2	1	2	1	28
OG0000309	Berberine and berberine like	IPR012951	2	2	2	2	1	1	1	1	1	1	1	2	2	0	3	2	1	2	1	28
OG0000310		IPR011051|IPR013096|IPR014710	2	2	3	3	1	1	0	0	0	0	0	2	2	2	2	3	1	3	1	28
OG0000311	Hexapeptide repeat of succinyl-transferase	IPR001451	1	1	2	2	0	2	1	1	1	2	1	2	2	2	2	2	1	2	1	28
OG0000312	Proliferating cell nuclear antigen, C-terminal domain	IPR022649	4	1	1	2	1	1	1	1	1	1	1	2	1	1	1	3	1	2	2	28
OG0000313	Sugar (and other) transporter	IPR005828	1	1	1	1	1	2	2	2	2	2	2	1	1	1	1	1	4	1	1	28
OG0000314	Multicopper oxidase	IPR001117	2	1	1	1	1	3	2	2	2	2	2	1	1	1	1	1	2	1	1	28
OG0000315	SART-1 family	IPR005011	1	1	1	1	4	1	1	1	1	1	1	2	2	2	2	2	1	2	1	28
OG0000316	Enoyl-(Acyl carrier protein) reductase		1	2	2	2	1	1	1	1	1	1	1	2	2	2	2	2	1	2	1	28
OG0000317	short chain dehydrogenase	IPR002347	1	1	3	2	1	1	1	1	1	1	1	2	2	2	2	2	1	2	1	28
OG0000318	Cytochrome b5-like Heme/Steroid binding domain	IPR001199	1	1	1	1	1	2	2	2	2	3	2	1	1	1	1	1	3	1	1	28
OG0000319	Alcohol dehydrogenase GroES-like domain	IPR013154	1	2	1	2	2	1	1	1	1	1	1	2	2	2	2	2	1	2	1	28
OG0000320	Chromatin remodelling complex Rsc7/Swp82 subunit	IPR013933	1	2	2	2	1	1	1	1	1	1	1	2	2	2	2	2	1	2	1	28
OG0000321	Fungal specific transcription factor domain	IPR021858	3	2	1	1	1	2	1	2	2	1	1	1	1	1	1	1	2	2	2	28
OG0000322	Pyridine nucleotide-disulphide oxidoreductase	IPR023753	1	1	1	1	3	1	1	1	1	1	1	2	2	2	2	2	2	2	1	28
OG0000323	Alcohol dehydrogenase GroES-like domain	IPR013154	1	1	1	1	1	1	1	1	1	1	1	2	2	2	2	3	1	2	3	28
OG0000324	O-methyltransferase	IPR001077	1	1	1	1	2	1	1	1	1	1	1	2	2	2	2	2	2	1	3	28
OG0000325	Amidase	IPR023631	2	2	2	2	1	1	1	1	1	1	1	2	2	2	2	1	1	2	1	28
OG0000326	Alcohol dehydrogenase GroES-like domain	IPR013154	1	2	2	2	1	1	1	1	1	1	1	2	2	2	2	2	1	2	1	28
OG0000327	C2 domain	IPR000008	2	2	2	2	1	1	1	1	1	1	1	2	2	1	2	2	1	2	1	28
OG0000328	Sugar (and other) transporter	IPR005828	1	1	1	1	1	3	2	2	2	2	2	1	1	1	1	1	2	1	2	28
OG0000329	Aldo/keto reductase family	IPR023210	3	1	1	1	1	2	2	2	2	2	2	1	1	1	1	1	2	1	1	28
OG0000330	Cytochrome P450	IPR001128	1	1	1	3	1	1	1	1	1	1	1	3	1	1	2	3	1	2	2	28
OG0000331	class IV aminotransferase	IPR001544|IPR036038	1	2	3	3	0	0	0	0	0	0	0	3	3	2	3	3	0	3	2	28
OG0000332	general substrate transporter	IPR003663|IPR005828|IPR005829|IPR020846|IPR036259	1	3	2	3	0	0	0	0	0	0	0	3	3	3	3	3	0	3	1	28
OG0000333	Aminotransferase class-III	IPR005814	1	2	2	2	1	1	1	1	1	1	1	2	2	2	2	2	1	2	1	28
OG0000334	FAD dependent oxidoreductase	IPR006076	1	2	2	1	0	2	1	1	1	1	1	2	2	2	2	2	1	2	2	28
OG0000335	Fungal specific transcription factor domain	IPR007219	1	1	2	2	4	1	1	1	1	1	1	2	1	2	2	2	1	2	0	28
OG0000336			3	2	2	2	2	0	0	0	0	0	0	2	2	2	2	2	0	3	4	28
OG0000337	FAD dependent oxidoreductase	IPR006076	1	2	2	2	1	1	1	1	1	1	1	2	2	2	2	2	1	2	1	28
OG0000338	Isocitrate/isopropylmalate dehydrogenase	IPR024084	1	3	2	2	1	1	1	1	1	1	1	2	2	2	1	2	1	2	1	28
OG0000339	ABC transporter	IPR003439	0	2	2	2	1	1	1	1	1	1	1	2	2	2	2	2	2	2	1	28
OG0000340	RNA recognition motif. (a.k.a. RRM, RBD, or RNP domain)	IPR000504	0	2	2	2	3	1	1	0	1	1	1	2	2	2	2	2	1	2	1	28
OG0000341	Protein of unknown function (DUF3435)	IPR021842	0	6	0	1	0	2	2	2	2	0	1	0	0	0	2	2	0	1	7	28
OG0000342	Amidohydrolase	IPR006680	0	2	2	2	2	1	1	1	1	1	1	2	2	2	2	2	1	2	1	28
OG0000343	AMP-binding enzyme	IPR000873	0	1	1	2	4	2	1	2	1	2	1	1	1	2	1	2	2	1	1	28
OG0000344	Methyltransferase domain		0	1	2	2	8	2	2	0	2	0	0	1	0	2	1	2	0	3	0	28
OG0000345	Amidohydrolase	IPR006680	5	2	2	2	2	1	1	1	1	1	1	1	1	1	1	1	1	1	1	27
OG0000346	Major Facilitator Superfamily	IPR011701	1	2	2	2	0	1	1	1	1	1	1	2	2	2	2	2	1	2	1	27
OG0000347	Histidine kinase-, DNA gyrase B-, and HSP90-like ATPase		1	1	1	1	1	6	2	1	2	1	2	1	1	1	1	1	1	1	1	27
OG0000348	hypothetical protein PV08_05471		3	1	1	1	3	1	1	1	1	1	1	1	1	1	1	1	1	1	5	27
OG0000349	Amidohydrolase	IPR006680	1	2	3	1	0	2	1	1	1	1	1	2	2	3	1	2	1	1	1	27
OG0000350	Aconitase C-terminal domain	IPR000573	3	1	2	2	1	1	1	0	1	0	0	2	2	2	2	2	1	2	2	27
OG0000351	COPI associated protein	IPR013714	6	1	1	1	1	1	1	1	1	1	1	1	1	1	1	1	2	1	3	27
OG0000352	Class II Aldolase and Adducin N-terminal domain	IPR001303	4	1	1	1	1	1	1	1	1	1	1	2	1	1	1	3	1	1	3	27
OG0000353	Sugar (and other) transporter	IPR005828	1	2	2	2	1	1	1	1	1	1	1	2	2	2	2	2	1	2	0	27
OG0000354	Flavin-binding monooxygenase-like	IPR020946	1	2	2	2	1	1	1	1	1	1	1	2	2	2	2	2	1	2	0	27
OG0000355	Pyridoxal-phosphate dependent enzyme	IPR001926	2	1	1	1	2	2	1	1	1	1	1	1	1	2	3	2	1	2	1	27
OG0000356	FAD dependent oxidoreductase	IPR006076	1	2	2	2	1	1	1	1	1	1	1	2	2	1	2	2	1	2	1	27
OG0000357	Domain of unknown function UPF0086	IPR002730	1	2	1	2	1	1	1	1	1	1	1	2	1	1	2	2	4	1	1	27
OG0000358	cytochrome P450	IPR001128|IPR002401|IPR017972|IPR036396	2	3	2	3	0	0	0	0	0	0	0	3	2	2	2	4	0	3	1	27
OG0000359	Fungal trichothecene efflux pump (TRI12)	IPR010573	2	2	1	2	1	1	1	1	1	1	1	2	2	1	1	2	1	2	2	27
OG0000360	Carboxylic ester hydrolase	IPR002018|IPR019826|IPR029058	2	3	2	2	1	0	0	0	0	0	0	2	3	2	2	2	0	2	4	27
OG0000361	Aldehyde dehydrogenase family	IPR015590	2	1	1	1	1	2	2	2	2	2	2	1	1	1	1	1	2	1	1	27
OG0000362	F-box-like	IPR001810	1	3	1	2	1	1	1	1	1	1	1	2	1	1	3	2	1	2	1	27
OG0000363	Ankyrin repeats (3 copies)	IPR020683	1	1	1	1	2	3	2	2	2	2	2	1	1	1	1	1	2	1	0	27
OG0000364	Enoyl-(Acyl carrier protein) reductase		1	1	1	1	1	2	2	2	2	2	2	1	1	1	1	1	2	1	2	27
OG0000365	Acyl-CoA dehydrogenase, C-terminal domain	IPR009075	1	1	1	1	1	2	2	2	2	2	2	1	1	1	1	1	2	1	2	27
OG0000366	Amino-transferase class IV	IPR001544	2	1	2	2	0	1	1	1	1	1	1	2	2	2	2	2	1	2	1	27
OG0000367	Helix-loop-helix DNA-binding domain	IPR011598	2	1	2	1	1	1	1	1	1	1	1	2	2	2	2	2	1	2	1	27
OG0000368	Fungal specific transcription factor domain	IPR007219	3	1	2	1	2	1	1	1	1	1	1	1	1	2	1	1	3	1	2	27
OG0000369	Hemerythrin HHE cation binding domain	IPR012312	1	1	2	1	2	1	1	1	1	1	1	2	2	2	2	2	1	2	1	27
OG0000370	alpha/beta hydrolase fold	IPR013094	1	1	1	1	2	1	1	1	1	1	1	2	2	2	2	2	1	2	2	27
OG0000371	Acetyltransferase (GNAT) family	IPR000182	1	1	1	1	1	2	1	1	1	1	1	2	2	2	3	3	1	2	0	27
OG0000372	Arginase family	IPR006035	1	0	1	1	3	2	2	2	2	2	2	1	1	1	1	1	2	1	1	27
OG0000373	Fungal specific transcription factor domain	IPR021858	1	2	2	2	0	1	1	1	1	1	1	2	2	2	2	2	1	2	1	27
OG0000374	Carbon-nitrogen hydrolase	IPR003010	1	1	2	2	1	1	1	1	1	1	1	2	2	2	2	2	1	2	1	27
OG0000375	NmrA-like family	IPR008030	0	2	2	2	1	1	1	1	1	1	1	2	2	2	2	2	1	3	0	27
OG0000376	Domain of unknown function (DUF3441)	IPR021846	0	2	2	2	2	1	1	1	1	1	1	2	2	2	2	2	1	2	0	27
OG0000377	beta-acetyl hexosaminidase like	IPR029019	0	3	2	2	0	1	1	1	1	1	1	2	2	2	2	2	1	2	1	27
OG0000378	E1-E2 ATPase	IPR008250	0	1	1	1	6	2	2	2	2	0	2	1	1	1	1	1	1	1	1	27
OG0000379	Major Facilitator Superfamily	IPR011701	0	2	2	2	2	1	1	1	1	1	1	2	2	2	2	2	1	2	0	27
OG0000380	MmgE/PrpD family	IPR005656	0	2	2	2	1	1	1	1	1	1	1	2	2	2	2	2	1	2	1	27
OG0000381			0	3	3	0	9	1	1	0	1	0	0	1	0	1	1	2	0	3	1	27
OG0000382	Fungal specific transcription factor domain-containing protein	IPR001138|IPR036864	6	1	1	2	5	0	0	0	0	0	0	1	1	1	1	2	0	2	3	26
OG0000383	AMP-binding enzyme	IPR000873	5	1	1	1	4	1	1	1	1	1	1	1	1	1	1	1	1	1	1	26
OG0000384	Isotrichodermin C-15 hydroxylase	IPR001128|IPR002401|IPR017972|IPR036396	4	2	0	2	6	0	0	0	0	0	0	3	2	0	0	2	0	0	5	26
OG0000385	Spinocerebellar ataxia type 10 protein domain	IPR019156	1	1	2	2	2	1	1	1	1	1	1	1	2	2	2	2	1	1	1	26
OG0000386	Protein kinase domain	IPR000719	4	1	1	1	4	1	1	1	1	1	1	1	1	1	1	1	2	1	1	26
OG0000387	siderophore iron transporter	IPR001411|IPR010573|IPR020846|IPR036259	6	1	1	1	3	0	0	0	0	0	0	1	2	1	1	1	0	1	7	26
OG0000388	Helix-loop-helix DNA-binding domain	IPR011598	2	2	1	1	2	1	1	1	1	1	1	2	1	1	2	2	1	2	1	26
OG0000389	Dynamin central region	IPR000375	2	2	1	1	2	3	1	1	1	1	1	1	2	2	1	1	1	1	1	26
OG0000390	Copper/zinc superoxide dismutase (SODC)	IPR001424	3	1	1	1	2	1	1	1	1	1	1	2	1	2	1	2	1	1	2	26
OG0000391	SBDS protein C-terminal domain	IPR018978	1	1	1	1	8	1	1	1	1	1	1	1	1	1	1	1	1	1	1	26
OG0000392	Carboxyl transferase domain	IPR000022	3	1	1	1	1	1	1	1	1	1	1	2	1	1	2	2	1	2	2	26
OG0000393	IMP-specific 5'-nucleotidase	IPR009453	3	1	1	1	2	1	1	1	1	1	1	2	1	1	2	2	1	2	1	26
OG0000394	FAD binding domain	IPR002938	1	1	2	2	0	1	1	1	1	1	1	2	2	2	2	2	1	2	1	26
OG0000395	beta-1,4-mannooligosaccharide phosphorylase	IPR007184	1	1	1	1	2	1	1	1	1	1	1	2	2	2	2	2	1	2	1	26
OG0000396	Acetyltransferase (GNAT) family	IPR000182	1	1	1	1	1	2	2	2	2	2	1	1	1	1	1	1	2	1	2	26
OG0000397	Amino acid permease	IPR004841	2	1	1	2	0	1	1	1	1	1	1	2	2	1	2	2	1	1	3	26
OG0000398	NOP5NT (NUC127) domain	IPR012974	2	1	2	1	3	1	1	1	1	1	1	1	1	1	1	1	1	2	3	26
OG0000399	NAD-dependent glycerol-3-phosphate dehydrogenase C-terminus	IPR006109	2	1	1	1	2	1	1	1	1	1	1	1	1	1	2	1	2	2	3	26
OG0000400	Dienelactone hydrolase family	IPR002925	2	1	1	1	1	1	1	1	1	1	1	2	2	2	2	2	1	2	1	26
OG0000401	fumarylacetoacetase	IPR005959|IPR011234|IPR015377|IPR036462|IPR036663	3	3	2	2	2	0	0	0	0	0	0	2	3	2	1	2	0	2	2	26
OG0000402	Binding domain of DNA repair protein Ercc1 (rad10/Swi10)	IPR004579	1	1	1	1	1	2	2	2	2	2	2	1	1	1	1	1	2	1	1	26
OG0000403	LamB/YcsF family	IPR005501	1	3	1	1	1	2	1	2	1	2	1	1	3	1	1	1	1	1	1	26
OG0000404	FAD-binding domain	IPR013112	1	2	1	1	3	3	1	1	1	1	1	1	1	2	2	2	1	1	0	26
OG0000405	Di-sulfide bridge nucleocytoplasmic transport domain	IPR018767	1	1	1	1	2	1	1	1	1	1	1	2	2	2	2	2	1	2	1	26
OG0000406	Fungal specific transcription factor domain	IPR007219	1	1	1	1	1	2	2	1	2	2	2	1	1	1	3	1	2	1	0	26
OG0000407	Major Facilitator Superfamily	IPR011701	1	2	2	2	2	2	1	1	1	1	1	1	1	1	1	1	1	2	2	26
OG0000408	ATP synthase subunit C	IPR002379	2	2	3	2	1	1	1	1	1	1	1	1	2	1	1	1	1	2	1	26
OG0000409	Enoyl-(Acyl carrier protein) reductase		8	1	1	1	1	1	1	1	1	1	1	1	1	1	1	1	1	1	1	26
OG0000410	Fungal specific transcription factor domain	IPR021858	1	1	1	1	1	2	2	2	2	2	2	1	1	1	1	1	2	1	1	26
OG0000411	Hsp70 protein	IPR013126	0	2	1	1	1	2	2	2	2	2	2	1	1	1	1	1	2	1	1	26
OG0000412	Major Facilitator Superfamily	IPR011701	0	2	2	2	0	1	1	1	1	1	0	2	2	2	2	2	1	2	2	26
OG0000413	Autophagy protein Apg17	IPR007240	0	1	1	2	1	2	2	1	2	1	2	1	1	1	2	2	1	2	1	26
OG0000414	Cytochrome c oxidase biogenesis protein Cmc1 like	IPR013892	0	1	1	1	2	1	1	1	1	1	1	2	2	2	2	2	1	2	2	26
OG0000415	AMP-binding enzyme	IPR000873	0	3	2	2	0	1	1	1	1	1	1	2	2	2	2	2	1	2	0	26
OG0000416	Fungal Zn(2)-Cys(6) binuclear cluster domain	IPR001138	0	2	2	2	1	1	1	1	1	1	1	2	2	2	2	2	1	2	0	26
OG0000417	50S ribosome-binding GTPase	IPR006073	1	1	1	1	7	1	1	1	1	1	1	1	1	1	1	1	1	1	1	25
OG0000418	Ferritin-like domain		2	3	1	1	2	1	2	1	2	0	2	1	1	1	1	1	1	1	1	25
OG0000419	Major Facilitator Superfamily	IPR011701	1	2	1	1	2	1	1	1	1	1	1	1	1	2	2	2	1	2	1	25
OG0000420	hypothetical protein PV08_00993	IPR001878	2	1	1	1	1	1	1	1	1	1	1	2	2	2	2	2	1	1	1	25
OG0000421	Enoyl-(Acyl carrier protein) reductase		2	1	1	1	2	2	1	1	2	1	2	1	1	1	1	1	2	1	1	25
OG0000422	Fungal specific transcription factor domain	IPR007219	1	1	1	1	1	1	1	1	1	1	1	2	1	2	2	2	2	2	1	25
OG0000423	Cupin domain	IPR013096	3	1	2	1	2	1	1	1	1	1	1	1	2	2	1	1	1	1	1	25
OG0000424	Major intrinsic protein	IPR000425	1	1	1	1	1	1	1	1	1	1	1	2	2	2	2	2	1	2	1	25
OG0000425	putative epoxide hydrolase	IPR000639|IPR010497|IPR016292|IPR029058	1	3	2	2	3	0	0	0	0	0	0	2	3	2	2	2	0	2	1	25
OG0000426	Major Facilitator Superfamily	IPR011701	2	1	1	1	1	2	2	1	2	1	2	1	1	1	1	1	2	1	1	25
OG0000427	Cytochrome P450	IPR001128	4	1	1	1	1	1	1	1	1	1	1	1	1	1	1	1	2	1	3	25
OG0000428	D-isomer specific 2-hydroxyacid dehydrogenase, catalytic domain	IPR006139	2	2	2	1	1	1	1	1	1	1	1	1	1	1	1	2	2	2	1	25
OG0000429	hypothetical protein PV08_08450	IPR003663|IPR005828|IPR005829|IPR020846|IPR036259	1	2	2	2	2	0	0	0	0	0	0	3	2	2	2	3	0	3	1	25
OG0000430	Protein kinase domain	IPR000719	4	1	1	1	4	1	1	1	1	1	1	1	1	1	1	1	1	1	1	25
OG0000431	Acyl-CoA oxidase	IPR002655	1	2	1	2	1	2	1	1	1	1	1	2	1	1	1	2	1	2	1	25
OG0000432	ACT domain	IPR002912	2	1	1	1	0	2	2	2	2	2	2	1	1	1	1	1	1	1	1	25
OG0000433	Fungal specific transcription factor domain	IPR007219	3	1	1	1	3	2	1	1	1	1	1	1	1	1	1	2	1	1	1	25
OG0000434	Fungal specific transcription factor domain	IPR007219	2	2	1	1	1	1	1	1	1	1	1	2	2	2	1	1	2	1	1	25
OG0000435	BRCA1 C Terminus (BRCT) domain	IPR001357	4	1	1	1	3	1	1	1	1	1	1	1	1	1	1	1	2	1	1	25
OG0000436	hypothetical protein PV08_06563	IPR041411	2	2	2	2	2	1	0	0	0	0	0	2	2	2	2	3	0	2	1	25
OG0000437	aromatic ring-opening dioxygenase family protein	IPR004183|IPR014436	2	3	2	2	1	0	0	1	0	1	0	2	2	2	2	2	0	2	1	25
OG0000438	hypothetical protein PV08_11942		5	1	3	1	1	1	0	1	0	1	0	1	1	2	2	2	0	1	2	25
OG0000439	Acyl-CoA dehydrogenase, C-terminal domain	IPR009075	3	1	1	1	2	2	1	1	1	1	1	1	1	1	1	1	1	1	3	25
OG0000440	FAD binding domain	IPR002938	2	1	1	2	1	1	1	1	1	1	1	1	2	2	1	1	1	2	2	25
OG0000441	Fungal Zn2-Cys6 binuclear cluster domain-containing protein isoform 3	IPR001138|IPR007219|IPR036864	2	2	2	2	2	0	0	0	0	0	0	2	2	2	2	2	1	2	2	25
OG0000442	Amidohydrolase family	IPR006680	1	1	1	1	1	1	1	1	1	1	1	2	2	2	2	2	1	2	1	25
OG0000443	Fungal specific transcription factor domain	IPR007219	1	4	1	1	1	1	1	1	1	1	1	1	1	1	1	2	1	2	2	25
OG0000444	Protein of unknown function (DUF3638)	IPR022099	3	2	1	1	3	1	1	1	1	1	1	1	1	1	1	2	1	1	1	25
OG0000445	Cytochrome b5-like Heme/Steroid binding domain	IPR001199	2	1	1	1	0	1	1	1	1	1	1	2	2	2	2	2	1	2	1	25
OG0000446	F-box domain	IPR001810	1	1	1	2	1	1	1	1	1	1	1	2	2	2	2	2	1	2	0	25
OG0000447	Chitin synthase III catalytic subunit	IPR022057	1	1	1	2	2	1	1	1	1	1	1	2	1	1	2	2	1	1	2	25
OG0000448	Cation transporting ATPase, C-terminus	IPR006068	3	2	1	1	4	1	1	1	1	1	1	1	1	1	1	1	1	1	1	25
OG0000449	Calcineurin-like phosphoesterase	IPR004843	3	1	1	1	3	1	1	1	1	1	1	1	1	1	1	1	2	2	1	25
OG0000450	2OG-Fe(II) oxygenase superfamily	IPR005123	1	2	2	2	1	1	1	0	1	0	1	2	2	2	2	2	0	2	1	25
OG0000451	NAD(P) transhydrogenase, mitochondrial	IPR000120|IPR023631|IPR036928	2	2	2	2	2	0	0	0	0	0	0	2	2	2	2	2	0	2	3	25
OG0000452	Cation transport ATPase (P-type)		1	1	2	1	3	1	1	1	1	1	1	1	1	2	1	2	1	1	2	25
OG0000453	His Kinase A (phospho-acceptor) domain	IPR003661	1	1	1	4	1	1	1	1	1	1	1	3	1	1	1	2	1	2	0	25
OG0000454	Dienelactone hydrolase family	IPR002925	1	1	0	0	6	1	1	1	1	1	1	2	1	1	1	2	1	2	1	25
OG0000455	15-hydroxyprostaglandin dehydrogenase	IPR002347|IPR020904|IPR036291	2	2	3	2	0	0	0	0	0	0	0	3	3	3	1	3	0	1	2	25
OG0000456	NADPH-dependent FMN reductase	IPR005025	1	1	2	2	2	1	1	1	1	1	1	2	1	2	1	1	1	2	1	25
OG0000457	SIS domain	IPR001347	1	2	2	2	2	1	1	1	1	1	1	1	1	1	1	1	1	2	2	25
OG0000458	Enoyl-CoA hydratase/isomerase	IPR001753	0	2	2	1	2	2	1	1	1	1	1	1	2	2	1	2	1	1	1	25
OG0000459	Acyltransferase family	IPR002656	0	1	1	1	1	2	2	2	2	2	2	1	1	1	1	1	3	1	0	25
OG0000460	Chromo (CHRromatin Organisation MOdifier) domain	IPR023780	0	2	2	3	4	1	1	0	1	0	0	0	1	2	2	1	0	5	0	25
OG0000461	FHA domain	IPR000253	0	1	1	1	8	1	1	1	1	1	1	1	1	1	1	1	1	1	1	25
OG0000462	OsmC-like protein	IPR003718	0	2	2	2	1	1	1	1	1	1	1	2	1	1	2	3	1	2	0	25
OG0000463	Fibronectin type III-like domain	IPR026891	0	1	1	2	1	1	1	1	1	1	1	2	1	1	1	2	1	2	4	25
OG0000464	ARP2/3 complex 20 kDa subunit (ARPC4)	IPR008384	0	0	1	0	4	2	2	2	3	2	2	0	1	1	0	1	2	0	2	25
OG0000465	dynamin GTPase	IPR000375|IPR001401|IPR003130|IPR019762|IPR020850|IPR022812|IPR027417|IPR030381	3	2	2	1	0	0	0	0	0	0	0	2	2	2	3	2	0	3	2	24
OG0000466	Domain of unknown function (DUF3425)	IPR021833	1	1	1	1	1	2	2	2	2	2	1	1	1	1	1	1	1	1	1	24
OG0000467	SET domain	IPR001214	2	1	1	1	4	1	1	1	1	1	1	1	1	1	1	1	2	1	1	24
OG0000468	Pex2 / Pex12 amino terminal region	IPR006845	6	1	1	1	1	1	1	1	1	1	1	1	1	1	1	1	1	1	1	24
OG0000469	Amino acid permease	IPR004841	2	2	2	2	2	1	1	1	1	1	1	1	1	1	1	1	1	1	1	24
OG0000470	26S proteasome subunit RPN7	IPR019585	2	1	1	1	5	1	1	1	1	1	1	1	1	1	1	1	1	1	1	24
OG0000471	Clr5 domain	IPR025676	4	1	1	1	3	1	1	1	1	1	1	1	1	1	1	1	1	1	1	24
OG0000472	STIMATE family	IPR022127	1	0	2	1	1	1	1	1	1	1	1	2	2	2	2	2	1	1	1	24
OG0000473	26S proteasome subunit RPN7	IPR019585	2	1	1	1	2	2	1	1	1	1	1	1	1	1	1	1	1	1	3	24
OG0000474	C2 domain	IPR000008	4	1	1	1	3	1	1	1	1	1	1	1	1	1	1	1	1	1	1	24
OG0000475	cytochrome P450	IPR001128|IPR002401|IPR036396	3	2	2	2	1	0	0	0	0	0	0	2	2	2	2	2	0	2	2	24
OG0000476	PDZ-like domain	IPR025926	1	1	1	2	1	1	1	1	1	1	1	2	1	2	1	2	1	2	1	24
OG0000477	DnaJ domain	IPR001623	1	2	2	1	1	1	1	1	1	1	1	1	1	2	2	1	1	1	2	24
OG0000478	hypothetical protein PV08_10897	IPR016181|IPR027417	2	2	2	3	0	0	0	0	0	0	0	2	2	2	2	3	0	2	2	24
OG0000479	Fungal specific transcription factor domain	IPR007219	1	1	1	1	5	1	1	1	1	1	1	1	1	1	1	1	1	1	2	24
OG0000480	related to vegetatible incompatibility protein HET-E-1	IPR007111|IPR013087|IPR027417|IPR037344	3	2	2	2	1	0	0	0	0	0	0	2	2	2	2	2	0	2	2	24
OG0000481	Carboxylesterase family	IPR002018	3	1	1	1	3	2	1	1	1	1	1	1	1	1	1	1	1	1	1	24
OG0000482	Carboxymuconolactone decarboxylase family	IPR003779	4	1	1	1	2	1	1	1	1	1	1	1	1	1	1	1	2	1	1	24
OG0000483	Ankyrin repeats (3 copies)	IPR020683	2	1	1	1	2	1	1	1	1	1	1	1	1	1	1	1	2	2	2	24
OG0000484	AMP-binding enzyme	IPR000873	1	3	2	1	0	1	1	1	1	1	1	1	2	2	2	1	1	1	1	24
OG0000485	Rab-GTPase-TBC domain	IPR000195	3	1	1	1	3	2	1	1	1	1	1	1	1	1	1	1	1	1	1	24
OG0000486	Fungal Zn(2)-Cys(6) binuclear cluster domain	IPR001138	1	1	1	1	2	1	1	1	1	1	1	2	2	2	1	2	1	2	0	24
OG0000487	ThiF family	IPR000594	3	2	1	1	0	1	1	1	1	1	1	1	1	3	1	1	1	1	2	24
OG0000488	hypothetical protein CDV31_015659	IPR039535	1	2	1	2	2	0	0	0	0	0	0	3	2	2	2	3	0	2	2	24
OG0000489	2OG-Fe(II) oxygenase superfamily	IPR005123	1	1	1	1	1	2	2	2	2	1	2	1	1	1	1	1	1	1	1	24
OG0000490	Alcohol dehydrogenase GroES-like domain	IPR013154	1	2	1	2	1	1	1	1	1	1	1	2	1	1	1	2	1	2	1	24
OG0000491	Thioesterase superfamily	IPR006683	1	1	1	1	1	2	2	2	2	2	1	1	1	1	1	1	2	1	0	24
OG0000492	C2H2-type zinc finger	IPR007087	5	1	1	1	2	1	1	1	1	1	1	1	1	1	1	1	1	1	1	24
OG0000493	Phosphotyrosyl phosphate activator (PTPA) protein	IPR004327	1	1	1	1	1	1	1	1	1	1	1	2	2	2	2	2	1	1	1	24
OG0000494	N-benzyl-3-pyrrolidinol dehydrogenase	IPR002328|IPR011032|IPR013149|IPR013154|IPR020843|IPR036291	2	2	2	2	4	0	0	0	0	0	0	2	2	2	2	2	0	2	0	24
OG0000495	Plasma-membrane choline transporter	IPR007603	2	1	1	1	5	1	1	1	1	1	1	1	1	1	1	1	1	1	1	24
OG0000496	Ankyrin repeats (3 copies)	IPR020683	3	1	1	1	1	2	1	1	1	1	1	1	1	1	1	2	1	1	2	24
OG0000497	AFG1-like ATPase	IPR005654	2	1	1	1	2	1	1	1	1	1	1	1	1	1	2	2	1	2	1	24
OG0000498	C-terminal domain of alpha-glycerophosphate oxidase	IPR031656	3	1	1	1	1	1	1	1	1	1	1	1	1	1	1	1	1	1	4	24
OG0000499	4-hydroxyphenylpyruvate dioxygenase	IPR013022|IPR036237	1	2	2	2	2	0	0	0	0	0	0	2	2	2	3	2	0	2	2	24
OG0000500	Arginase family	IPR006035	1	1	1	1	1	3	2	1	2	1	2	1	1	1	1	1	1	1	1	24
OG0000501	Fungal Zn(2)-Cys(6) binuclear cluster domain	IPR001138	3	1	1	1	2	1	1	1	1	1	1	1	1	1	1	1	1	1	3	24
OG0000502	Protein of unknown function (DUF2434)	IPR018830	3	1	1	1	2	1	1	1	1	1	2	1	1	1	1	1	2	1	1	24
OG0000503	Cytochrome P450	IPR001128	1	3	2	1	2	1	1	1	1	1	0	1	1	2	1	1	2	1	1	24
OG0000504	related to zinc-containing long-chain alcohol dehydrogenase	IPR011032|IPR013149|IPR013154|IPR020843|IPR036291	2	2	2	2	1	2	0	0	0	0	0	2	2	2	2	2	0	2	1	24
OG0000505	Cytochrome P450	IPR001128	1	3	2	1	2	1	1	1	1	1	1	1	1	1	2	1	1	1	1	24
OG0000506	putative transporter	IPR011701|IPR020846|IPR036259	1	2	2	2	3	0	0	0	0	0	0	2	2	2	2	2	0	2	2	24
OG0000507	FAD binding domain	IPR003097	2	1	1	1	1	1	1	1	1	1	1	2	2	2	1	2	1	1	1	24
OG0000508	AMP-binding enzyme	IPR000873	2	1	1	1	1	1	1	1	1	1	1	1	1	1	1	1	1	1	5	24
OG0000509	AMP-binding enzyme	IPR000873	1	2	1	2	1	1	1	1	1	1	1	2	1	1	1	2	1	2	1	24
OG0000510	Aminotransferase class I and II	IPR004839	1	1	1	0	1	2	2	2	2	2	2	0	1	1	0	1	2	1	2	24
OG0000511	alpha/beta hydrolase fold	IPR013094	2	1	1	1	2	2	2	1	2	1	1	1	1	1	1	1	1	1	1	24
OG0000512		IPR036291	1	2	2	2	1	0	0	0	0	0	0	3	2	2	2	4	0	2	1	24
OG0000513	Major Facilitator Superfamily	IPR011701	2	1	1	1	1	2	2	1	2	1	2	1	1	1	1	1	1	1	1	24
OG0000514	Cytochrome b5-like Heme/Steroid binding domain	IPR001199	3	1	1	1	3	1	1	1	1	1	1	1	1	1	1	1	1	1	2	24
OG0000515	FAD binding domain	IPR002938	1	2	1	1	1	1	1	1	1	1	1	1	2	1	2	1	1	1	3	24
OG0000516	ABC1 family	IPR004147	1	1	1	1	3	3	1	1	1	1	1	1	1	1	1	1	2	1	1	24
OG0000517	Kinase phosphorylation protein	IPR019315	1	1	2	1	1	1	1	1	1	1	1	1	2	2	1	1	1	1	3	24
OG0000518	Protein kinase domain	IPR000719	3	1	1	1	2	1	1	1	1	1	1	1	1	1	1	1	3	1	1	24
OG0000519	Major Facilitator Superfamily	IPR011701	3	1	1	1	4	1	1	1	1	1	1	1	1	1	1	1	1	1	1	24
OG0000520	Cullin binding	IPR005176	3	1	1	1	4	1	1	1	1	1	1	1	1	1	1	1	1	1	1	24
OG0000521	Autophagy-related protein 27	IPR018939	2	2	2	1	2	1	1	1	1	1	1	1	1	1	1	2	1	1	1	24
OG0000522	MRG	IPR026541	1	1	1	1	1	1	1	1	1	1	1	2	2	2	2	2	1	1	1	24
OG0000523	Fumarylacetoacetase N-terminal	IPR015377	0	1	1	1	1	2	2	2	2	2	2	1	1	1	1	1	2	1	0	24
OG0000524	UDP-glucose/GDP-mannose dehydrogenase family, central domain	IPR014026	0	1	1	1	3	1	1	1	1	1	1	2	2	2	2	2	1	1	0	24
OG0000525	Fungal specific transcription factor domain-containing protein	IPR001138|IPR007219|IPR013087|IPR036864	0	2	3	3	1	0	0	0	0	0	0	3	2	3	2	3	0	2	0	24
OG0000526	GMC oxidoreductase	IPR000172	0	1	1	1	5	1	1	1	1	1	1	1	1	1	2	2	1	1	1	24
OG0000527	Glutaredoxin	IPR002109	2	2	1	1	3	2	1	1	1	1	1	1	1	1	1	1	1	1	0	23
OG0000528	Glycosyl hydrolase family 76	IPR005198	4	1	1	1	2	1	1	1	1	1	1	1	1	1	1	1	1	1	1	23
OG0000529	Protein prenyltransferase alpha subunit repeat	IPR002088	3	1	1	1	2	2	1	1	1	1	1	1	1	1	1	1	1	1	1	23
OG0000530	short chain dehydrogenase	IPR002347	3	1	1	1	2	1	1	1	1	1	1	1	1	1	1	1	1	1	2	23
OG0000531	7 transmembrane receptor (Secretin family)	IPR000832	3	1	1	1	2	1	1	1	1	1	1	1	1	1	1	1	2	1	1	23
OG0000532	fungal STAND N-terminal Goodbye domain	IPR031350	4	1	1	1	2	1	1	1	1	1	1	1	1	1	1	1	1	1	1	23
OG0000533	Calcineurin-like phosphoesterase	IPR004843	2	1	1	1	2	1	1	1	1	1	1	1	1	1	1	1	3	1	1	23
OG0000534	Fungal specific transcription factor domain	IPR007219	1	1	1	2	1	1	1	1	1	1	1	2	1	1	2	2	1	1	1	23
OG0000535	Aspartyl protease	IPR019103	3	1	1	1	2	1	1	1	1	1	1	1	1	1	1	1	1	1	2	23
OG0000536	FAD binding domain	IPR002938	1	1	1	1	0	2	1	1	1	1	1	1	3	1	1	2	1	1	2	23
OG0000537	Rhodanese-like domain	IPR001763	1	1	1	1	1	2	2	1	2	1	2	1	1	1	1	1	1	1	1	23
OG0000538	Glucanosyltransferase	IPR004886	4	1	1	1	2	1	1	1	1	1	1	1	1	1	1	1	1	1	1	23
OG0000539	Salt tolerance down-regulator	IPR025279	2	1	1	1	3	1	1	1	1	1	1	1	1	1	1	1	2	1	1	23
OG0000540	Alcohol dehydrogenase GroES-like domain	IPR013154	2	1	1	1	1	1	1	1	1	1	1	1	1	1	1	1	1	1	4	23
OG0000541	Stress responsive A/B Barrel Domain	IPR013097	2	1	1	1	4	1	1	1	1	1	1	1	1	1	1	1	1	1	1	23
OG0000542	CBS domain	IPR000644	1	1	1	1	0	1	1	1	1	1	1	1	1	1	1	1	1	1	6	23
OG0000543	Major Facilitator Superfamily	IPR011701	2	1	1	1	1	1	1	1	1	1	1	1	1	1	1	1	1	1	4	23
OG0000544	Putative transmembrane protein 170	IPR019334	2	2	1	1	2	1	1	1	1	1	1	1	2	1	1	1	1	1	1	23
OG0000545	Fungal Zn(2)-Cys(6) binuclear cluster domain	IPR001138	1	1	1	1	1	2	2	1	2	1	2	1	1	1	1	1	1	1	1	23
OG0000546	ABC transporter	IPR003439	1	1	1	1	2	1	1	0	1	0	1	2	2	2	2	2	0	2	1	23
OG0000547	Major Facilitator Superfamily	IPR011701	2	1	1	1	3	1	1	1	1	1	1	1	1	1	1	1	1	1	2	23
OG0000548	RasGEF domain	IPR001895	2	1	1	1	2	1	1	1	1	1	1	1	1	1	1	1	1	1	3	23
OG0000549	Calpain family cysteine protease	IPR001300	1	1	1	1	5	1	1	1	1	1	1	1	1	1	1	1	1	1	1	23
OG0000550	Cytochrome P450	IPR001128	1	2	2	2	1	1	1	0	1	0	1	2	1	1	2	4	0	1	0	23
OG0000551	Amidohydrolase	IPR006680	4	1	1	1	2	1	1	1	1	1	1	1	1	1	1	1	1	1	1	23
OG0000552	Glyoxal oxidase N-terminus	IPR009880	2	1	1	0	2	2	1	1	1	1	1	0	1	2	1	1	2	2	1	23
OG0000553	Rab-GTPase-TBC domain	IPR000195	2	1	1	1	4	1	1	1	1	1	1	1	1	1	1	1	1	1	1	23
OG0000554	MaoC like domain	IPR002539	1	1	1	1	1	2	1	1	1	1	1	1	1	1	1	1	1	1	4	23
OG0000555	Phosphomethylpyrimidine kinase	IPR013749	3	1	1	1	2	2	1	1	1	1	1	1	1	1	1	1	1	1	1	23
OG0000556	Acetyltransferase (GNAT) family	IPR000182	3	1	1	1	3	1	1	1	1	1	1	1	1	1	1	1	1	1	1	23
OG0000557		IPR027796	2	2	2	2	2	0	0	0	0	0	0	2	2	2	2	2	0	2	1	23
OG0000558	AMP-binding enzyme	IPR000873	2	2	1	1	2	2	1	1	1	1	1	1	1	1	1	1	1	1	1	23
OG0000559	SPX domain	IPR004331	2	1	1	1	3	1	1	1	1	1	1	1	1	1	1	1	2	1	1	23
OG0000560	Anticodon binding domain	IPR004154	2	1	1	1	2	1	1	1	1	1	1	2	1	1	1	2	1	2	0	23
OG0000561	Pex19 protein family	IPR006708	2	1	1	1	2	1	1	1	1	1	1	1	1	1	1	1	3	1	1	23
OG0000562	Zinc finger, C2H2 type	IPR007087	1	2	2	3	1	1	1	1	1	1	1	1	1	1	1	1	1	1	1	23
OG0000563	Fungal specific transcription factor domain	IPR007219	3	1	1	1	3	1	1	1	1	1	1	1	1	1	1	1	1	1	1	23
OG0000564	Ketopantoate reductase PanE/ApbA	IPR013332	2	1	1	1	3	1	1	1	1	1	1	1	1	1	1	1	2	1	1	23
OG0000565	AMP-binding enzyme	IPR000873	4	1	1	1	1	1	1	1	1	1	1	1	1	1	1	1	1	1	2	23
OG0000566	vWA found in TerF C terminus	IPR019303	2	1	1	1	3	2	1	1	1	1	1	1	1	1	1	1	1	1	1	23
OG0000567	Sugar (and other) transporter	IPR005828	1	1	1	1	4	2	1	1	1	1	1	1	1	1	1	1	1	1	1	23
OG0000568	LSM domain	IPR001163	1	1	1	1	1	2	1	2	1	2	1	1	1	1	1	1	2	1	1	23
OG0000569	Bacterial signalling protein N terminal repeat	IPR005330	1	1	1	1	1	2	1	1	1	1	1	1	2	1	2	2	1	1	1	23
OG0000570	NAD dependent epimerase/dehydratase family	IPR001509	1	1	1	1	5	1	1	1	1	1	1	1	1	1	1	1	1	1	1	23
OG0000571	INO80 complex subunit Ies4	IPR013175	3	1	1	1	3	1	1	1	1	1	1	1	1	1	1	1	1	1	1	23
OG0000572	Peptidase family M28	IPR007484	1	1	1	1	1	2	2	1	2	2	1	1	1	1	1	1	1	1	1	23
OG0000573	Alpha/beta hydrolase family	IPR000073	2	3	1	1	1	1	1	1	1	1	1	1	1	1	2	1	1	1	1	23
OG0000574	Cation efflux family	IPR002524	4	0	0	0	14	1	1	1	1	0	1	0	0	0	0	0	0	0	0	23
OG0000575	Protein phosphatase 2A regulatory B subunit (B56 family)	IPR002554	2	1	1	1	4	1	1	1	1	1	1	1	1	1	1	1	1	1	1	23
OG0000576	Pyruvate kinase, alpha/beta domain	IPR015795	2	1	1	1	2	2	1	1	1	1	1	1	1	1	1	1	1	1	2	23
OG0000577	Glycosyl hydrolases family 17	IPR000490	1	2	2	2	0	1	1	0	1	0	0	2	2	2	3	2	0	2	0	23
OG0000578	Protein kinase domain	IPR000719	4	1	1	1	2	1	1	1	1	1	1	1	1	1	1	1	1	1	1	23
OG0000579	Protein of unknown function (DUF3591)	IPR022591	2	1	1	1	2	2	1	1	1	1	2	1	1	1	1	1	1	1	1	23
OG0000580	Aldo/keto reductase, putative	IPR005399|IPR011701|IPR020846|IPR023210|IPR036259|IPR036812	2	2	2	1	1	0	0	0	0	0	0	2	3	2	2	2	0	2	2	23
OG0000581	Eukaryotic cytochrome b561	IPR006593	4	1	1	1	2	1	1	1	1	1	1	1	1	1	1	1	1	1	1	23
OG0000582	Fungal specific transcription factor domain	IPR007219	1	1	1	1	4	1	1	1	1	1	1	1	2	1	1	1	1	1	1	23
OG0000583	Pyruvate kinase, alpha/beta domain	IPR015795	2	1	1	1	4	1	1	1	1	1	1	1	1	1	1	1	1	1	1	23
OG0000584	Bacterial transferase hexapeptide (six repeats)	IPR001451	2	2	1	1	1	1	1	1	1	1	1	1	1	1	1	2	1	2	1	23
OG0000585	D-xylulose 5-phosphate/D-fructose 6-phosphate phosphoketolase	IPR005593	1	1	2	0	1	2	2	2	2	2	1	0	1	1	0	1	2	0	2	23
OG0000586	Bacteriorhodopsin-like protein	IPR001425	1	2	1	1	3	1	1	1	1	1	1	1	1	1	1	1	1	1	2	23
OG0000587	vegetative incompatibility protein HET-E-1	IPR002110|IPR007111|IPR020683|IPR027417|IPR036770	1	1	1	1	1	0	0	0	0	0	0	1	1	1	1	1	0	2	11	23
OG0000588	Domain of unknown function (DUF4484)	IPR028115	4	1	1	1	2	1	1	1	1	1	1	1	1	1	1	1	1	1	1	23
OG0000589	FF domain	IPR002713	2	1	1	1	3	1	1	1	1	1	1	1	1	1	1	1	2	1	1	23
OG0000590	purine and uridine phosphorylase	IPR000845|IPR035994	1	1	1	1	1	0	0	0	0	0	0	1	1	3	2	2	0	2	7	23
OG0000591	Peptidase C65 Otubain	IPR019400	1	1	1	1	3	1	1	1	1	1	1	1	1	1	1	1	3	1	1	23
OG0000592	Flavin-binding monooxygenase-like	IPR020946	2	1	1	1	4	1	1	1	1	1	1	1	1	1	1	1	1	1	1	23
OG0000593	homogentisate 1,2-dioxygenase	IPR005708	2	1	1	1	4	1	1	1	1	1	1	1	1	1	1	1	1	1	1	23
OG0000594	FAD dependent oxidoreductase	IPR006076	1	1	1	1	1	1	1	1	1	1	1	1	2	2	1	1	1	1	3	23
OG0000595	Fungal Zn2-Cys6 binuclear cluster domain-containing protein	IPR001138|IPR036864	1	1	1	1	5	1	1	1	1	1	1	1	1	1	1	1	1	1	1	23
OG0000596	G protein-coupled glucose receptor regulating Gpa2	IPR023041	2	1	1	1	1	1	1	1	1	1	1	2	1	1	1	2	1	2	1	23
OG0000597	Polysaccharide deacetylase	IPR002509	3	1	1	1	3	1	1	1	1	1	1	1	1	1	1	1	1	1	1	23
OG0000598	hypothetical protein PV08_05502		1	2	3	2	2	0	0	0	0	0	0	2	2	3	2	2	0	2	0	23
OG0000599	Fibronectin type III-like domain	IPR026891	1	1	1	2	1	1	1	1	1	1	1	2	1	1	1	2	1	2	1	23
OG0000600	3-hydroxyanthranilic acid dioxygenase	IPR010329	2	2	2	2	2	1	1	1	1	1	1	0	0	2	1	1	1	1	1	23
OG0000601	ATP-NAD kinase	IPR002504	1	1	1	1	5	1	1	1	1	1	1	1	1	1	1	1	1	1	1	23
OG0000602	vWA found in TerF C terminus	IPR019303	3	1	1	1	2	1	1	1	1	1	1	1	1	1	1	1	2	1	1	23
OG0000603	CTLH/CRA C-terminal to LisH motif domain	IPR024964	2	1	1	1	4	1	1	1	1	1	1	1	1	1	1	1	1	1	1	23
OG0000604	bZIP transcription factor	IPR004827	2	1	1	1	4	1	1	1	1	1	1	1	1	1	1	1	1	1	1	23
OG0000605	short chain dehydrogenase	IPR002347	3	1	1	1	3	1	1	1	1	1	1	1	1	1	1	1	1	1	1	23
OG0000606	Fes/CIP4, and EFC/F-BAR homology domain	IPR001060	1	1	1	1	5	1	1	1	1	1	1	1	1	1	1	1	1	1	1	23
OG0000607	Glycosyl hydrolases family 18	IPR001223	2	1	1	1	3	1	1	1	1	1	1	1	1	1	1	1	2	1	1	23
OG0000608	related to O-methylsterigmatocystin oxidoreductase	IPR001128|IPR002401|IPR036396	2	1	3	1	0	0	0	0	0	0	0	2	2	3	2	4	0	2	1	23
OG0000609	RhoGAP domain	IPR000198	1	1	1	1	1	2	2	1	2	1	2	1	1	1	1	1	1	1	1	23
OG0000610	Helix-hairpin-helix domain		1	1	1	2	1	2	2	1	2	1	2	1	1	1	1	1	1	1	0	23
OG0000611	Fungal specific transcription factor domain	IPR007219	1	1	1	1	4	2	1	1	1	1	1	1	1	1	1	1	1	1	1	23
OG0000612	FAD binding domain	IPR002938	0	1	2	1	2	1	1	1	1	1	1	1	2	2	1	2	1	1	1	23
OG0000613	FAD dependent oxidoreductase	IPR006076	0	1	2	2	2	1	1	2	1	1	1	1	1	1	1	1	2	2	0	23
OG0000614	Asparaginase, N-terminal	IPR027474	0	1	1	1	0	1	1	2	1	1	1	2	2	2	2	1	2	2	0	23
OG0000615	SET domain	IPR001214	0	1	1	2	1	2	1	1	1	1	1	2	1	1	1	2	1	2	1	23
OG0000616	Pyridine nucleotide-disulphide oxidoreductase	IPR023753	0	0	1	0	2	2	2	2	2	2	2	0	1	1	0	1	2	0	3	23
OG0000618	BAH domain	IPR001025	3	1	1	1	1	1	1	1	1	1	1	1	1	1	1	1	2	1	1	22
OG0000619	F-box domain	IPR001810	3	1	1	1	1	1	1	1	1	1	1	1	1	1	1	2	1	1	1	22
OG0000620	Cation transport ATPase (P-type)		3	1	1	1	2	1	1	1	1	1	1	1	1	1	1	1	1	1	1	22
OG0000621	Ammonium Transporter Family	IPR024041	2	1	1	1	2	1	1	1	1	1	1	1	1	1	1	2	1	1	1	22
OG0000622	RNA recognition motif. (a.k.a. RRM, RBD, or RNP domain)	IPR000504	1	1	1	1	1	1	1	1	1	1	1	1	1	1	1	1	2	2	2	22
OG0000623	FAD binding domain	IPR002938	1	1	1	1	3	1	1	1	1	1	1	1	1	1	1	1	2	1	1	22
OG0000624	Glutamate-cysteine ligase	IPR004308	1	1	1	1	4	1	1	1	1	1	1	1	1	1	1	1	1	1	1	22
OG0000625	Acyl-CoA oxidase	IPR002655	1	1	1	1	2	1	1	1	1	1	1	1	1	1	1	2	1	2	1	22
OG0000626	RNA recognition motif. (a.k.a. RRM, RBD, or RNP domain)	IPR000504	1	1	1	1	2	1	1	1	1	1	1	1	1	2	1	1	2	1	1	22
OG0000627	Domain of unknown function (DUF1720)	IPR013182	2	1	1	1	3	1	1	1	1	1	1	1	1	1	1	1	1	1	1	22
OG0000628	Fungal specific transcription factor domain-containing protein	IPR020946|IPR036188	5	1	1	2	2	0	0	0	0	0	0	2	2	1	1	2	0	2	1	22
OG0000629	Fatty acid desaturase	IPR005804	2	2	1	1	1	1	1	1	1	1	1	1	1	1	1	1	1	2	1	22
OG0000630	Class-II DAHP synthetase family	IPR002480	1	1	1	1	4	1	1	1	1	1	1	1	1	1	1	1	2	1	0	22
OG0000631	A repeated domain in UCH-protein	IPR025305	3	1	1	1	2	1	1	1	1	1	1	1	1	1	1	1	1	1	1	22
OG0000632	bZIP transcription factor	IPR004827	3	1	1	1	2	1	1	1	1	1	1	1	1	1	1	1	1	1	1	22
OG0000633	Pentatricopeptide repeat domain	IPR002885	2	1	1	1	3	1	1	1	1	1	1	1	1	1	1	1	1	1	1	22
OG0000634	AMP-binding enzyme	IPR000873	2	1	1	1	2	2	1	1	1	1	1	1	1	1	1	1	1	1	1	22
OG0000635	Amidase	IPR023631	3	1	1	1	2	1	1	1	1	1	1	1	1	1	1	1	1	1	1	22
OG0000636	MFS/sugar transport protein		3	1	1	1	2	1	1	1	1	1	1	1	1	1	1	1	1	1	1	22
OG0000637	hypothetical protein PV08_00550	IPR013087	2	1	1	1	1	1	1	1	1	1	1	1	1	1	1	1	2	2	1	22
OG0000638	Common central domain of tyrosinase	IPR002227	3	1	1	1	1	1	1	1	1	1	1	1	1	1	1	1	1	1	2	22
OG0000639	hypothetical protein PV08_00014	IPR001128|IPR002401|IPR017972|IPR036396	2	2	1	1	1	0	0	0	0	0	0	2	2	2	2	3	0	3	1	22
OG0000640	Cation transporter/ATPase, N-terminus	IPR004014	1	1	1	1	4	1	1	1	1	1	1	1	1	1	1	1	1	1	1	22
OG0000641	Bromodomain	IPR001487	2	1	1	1	2	2	1	1	1	1	1	1	1	1	1	1	1	1	1	22
OG0000642			1	2	2	2	1	0	0	0	0	0	0	2	2	2	2	2	0	2	2	22
OG0000643	Protein of unknown function (DUF971)	IPR010376	1	1	1	1	2	3	1	1	1	1	1	1	1	1	1	1	1	1	1	22
OG0000644	FAR-17a/AIG1-like protein	IPR006838	2	1	1	1	2	2	1	1	1	1	1	1	1	1	1	1	1	1	1	22
OG0000645	NAD binding domain of 6-phosphogluconate dehydrogenase	IPR006115	4	1	1	1	1	2	1	0	1	1	1	1	1	1	1	1	2	1	0	22
OG0000646	Survival protein SurE	IPR002828	2	1	1	1	2	2	1	1	1	1	1	1	1	1	1	1	1	1	1	22
OG0000647	Enoyl-(Acyl carrier protein) reductase		2	2	1	1	1	1	1	1	1	1	1	1	1	1	1	1	1	1	2	22
OG0000648	MaoC like domain	IPR002539	2	2	1	1	1	1	1	1	1	1	1	1	1	1	1	1	1	1	2	22
OG0000649	Protein SGE1	IPR001411|IPR005829|IPR010573|IPR020846|IPR036259	2	1	2	2	0	0	0	0	0	0	0	2	2	2	2	2	0	2	3	22
OG0000650	GPI transamidase subunit PIG-U	IPR009600	1	1	1	1	1	1	1	1	1	1	1	1	1	1	1	1	1	1	4	22
OG0000651	Phosphomethylpyrimidine kinase	IPR013749	1	1	1	1	4	1	1	1	1	1	1	1	1	1	1	1	1	1	1	22
OG0000652	CHY zinc finger	IPR008913	4	1	1	1	1	1	1	1	1	1	1	1	1	1	1	1	1	1	1	22
OG0000653	Protein kinase domain	IPR000719	1	1	1	1	4	1	1	1	1	1	1	1	1	1	1	1	1	1	1	22
OG0000654	Oxidoreductase family, NAD-binding Rossmann fold	IPR000683	3	1	1	1	2	1	1	1	1	1	1	1	1	1	1	1	1	1	1	22
OG0000655	alpha-1,3-mannosyltransferase CMT1	IPR021047	5	2	2	2	2	0	0	0	0	0	0	1	1	1	1	1	0	2	2	22
OG0000656	HeH/LEM domain	IPR025856	2	1	1	1	2	1	1	1	1	1	1	1	1	1	1	1	2	1	1	22
OG0000657	Ribose 5-phosphate isomerase A (phosphoriboisomerase A)	IPR004788	2	1	1	1	2	1	1	1	1	1	1	1	1	1	1	1	2	1	1	22
OG0000658	Methyltransferase domain		4	1	1	1	1	1	1	1	1	1	1	1	1	1	1	1	1	1	1	22
OG0000659	Conserved region of Rad21 / Rec8 like protein	IPR006909	2	1	1	1	3	1	1	1	1	1	1	1	1	1	1	1	1	1	1	22
OG0000660	Fungal specific transcription factor domain	IPR021858	1	1	1	1	2	1	1	1	1	1	1	1	1	1	1	1	1	1	3	22
OG0000661	Autophagy-related protein 27	IPR018939	2	1	1	1	2	1	1	1	1	1	1	1	1	1	1	1	2	1	1	22
OG0000662	Protein kinase domain	IPR000719	2	1	1	1	3	1	1	1	1	1	1	1	1	1	1	1	1	1	1	22
OG0000663	Enoyl-CoA hydratase/isomerase	IPR001753	1	1	1	1	2	1	1	1	1	1	1	1	1	1	1	1	1	1	3	22
OG0000664	Guanine nucleotide exchange factor synembryn	IPR019318	4	0	1	1	2	1	1	1	1	1	1	1	1	1	1	1	1	1	1	22
OG0000665	related to kinesin light chain 1	IPR002151|IPR002182|IPR010730|IPR011990|IPR019734|IPR027417	1	2	2	2	0	0	0	0	0	0	0	2	2	2	2	3	0	2	2	22
OG0000666	DSBA-like thioredoxin domain	IPR001853	3	1	1	1	2	1	1	1	1	1	1	1	1	1	1	1	1	1	1	22
OG0000667	FYVE zinc finger	IPR000306	2	1	1	1	2	1	1	1	1	1	1	1	1	1	1	1	2	1	1	22
OG0000668	Insulinase (Peptidase family M16)	IPR011765	2	1	1	1	3	1	1	1	1	1	1	1	1	1	1	1	1	1	1	22
OG0000669	Protein kinase domain	IPR000719	3	1	1	1	2	1	1	1	1	1	1	1	1	1	1	1	1	1	1	22
OG0000670	Domain of unknown function (DUF1741)	IPR013636	1	1	1	1	4	1	1	1	1	1	1	1	1	1	1	1	1	1	1	22
OG0000671	Arginine-tRNA-protein transferase, C terminus	IPR007472	1	1	1	1	4	1	1	1	1	1	1	1	1	1	1	1	1	1	1	22
OG0000672	Glycoprotease family	IPR000905	1	1	1	1	4	1	1	1	1	1	1	1	1	1	1	1	1	1	1	22
OG0000673	Glycosyl hydrolase family 81	IPR005200	4	1	1	1	1	1	1	1	1	1	1	1	1	1	1	1	1	1	1	22
OG0000674	Glutathione-dependent formaldehyde-activating enzyme/centromere protein V	IPR006913|IPR011057	2	2	3	2	1	0	0	0	0	0	0	2	2	2	2	2	0	2	0	22
OG0000675	Dip2/Utp12 Family	IPR007148	4	1	1	1	1	1	1	1	1	1	1	1	1	1	1	1	1	1	1	22
OG0000676	Glutathione S-transferase, N-terminal domain	IPR004045	3	1	1	0	3	1	1	1	1	1	1	0	0	0	1	1	1	1	4	22
OG0000677	Beta-lactamase	IPR001466	2	1	1	1	1	2	1	1	1	1	1	1	1	1	1	1	2	1	1	22
OG0000678	Major Facilitator Superfamily	IPR011701	1	1	1	1	4	1	1	1	1	1	1	1	1	1	1	1	1	1	1	22
OG0000679	NmrA-like family	IPR008030	1	1	1	1	2	1	1	1	1	1	1	1	1	1	1	1	1	1	3	22
OG0000680	50S ribosome-binding GTPase	IPR006073	1	0	0	0	1	4	2	2	2	2	2	0	0	0	0	0	2	1	3	22
OG0000681	lactate/malate dehydrogenase, alpha/beta C-terminal domain	IPR022383	1	1	1	1	2	3	1	1	1	1	1	1	1	1	1	1	1	1	1	22
OG0000682	Conserved hypothetical protein (DUF2461)	IPR012808	1	1	1	1	2	1	1	2	1	2	1	1	1	1	1	1	1	1	1	22
OG0000683	MIZ/SP-RING zinc finger	IPR004181	2	1	1	1	3	1	1	1	1	1	1	1	1	1	1	1	1	1	1	22
OG0000684	Domain of unknown function (DUF3384)	IPR024584	3	1	1	1	2	1	1	1	1	1	1	1	1	1	1	1	1	1	1	22
OG0000685	Cytochrome P450	IPR001128	2	1	1	1	2	1	1	1	1	1	1	1	1	1	1	1	2	1	1	22
OG0000686	RNA recognition motif 2	IPR007201	2	1	1	1	3	1	1	1	1	1	1	1	1	1	1	1	1	1	1	22
OG0000687	2OG-Fe(II) oxygenase superfamily	IPR005123	1	1	1	1	1	1	1	1	1	1	1	1	2	2	1	1	2	1	1	22
OG0000688	alpha-1,3-glucan synthase	IPR001296|IPR006047|IPR013534|IPR017853	1	2	2	2	1	0	0	0	0	0	0	2	2	2	2	2	0	3	1	22
OG0000689	Beta-lactamase	IPR001466	2	1	1	1	3	1	1	1	1	1	1	1	1	1	1	1	1	1	1	22
OG0000690	Major Facilitator Superfamily	IPR011701	2	1	1	1	1	1	1	1	1	1	1	1	1	1	1	1	1	1	3	22
OG0000691	2OG-Fe(II) oxygenase superfamily	IPR027450	2	1	1	1	3	1	1	1	1	1	1	1	1	1	1	1	1	1	1	22
OG0000692	D123	IPR009772	1	1	1	1	4	1	1	1	1	1	1	1	1	1	1	1	1	1	1	22
OG0000693	D-isomer specific 2-hydroxyacid dehydrogenase, catalytic domain	IPR006139	2	1	1	1	3	1	1	1	1	1	1	1	1	1	1	1	1	1	1	22
OG0000694	CAS/CSE protein, C-terminus	IPR005043	2	1	1	1	1	1	1	1	1	1	1	1	1	1	1	1	3	1	1	22
OG0000695	Phosphoesterase family	IPR007312	1	1	1	1	4	1	1	1	1	1	1	1	1	1	1	1	1	1	1	22
OG0000696	Phosphatidylinositol 3- and 4-kinase	IPR000403	2	1	1	1	2	1	1	1	1	1	1	1	1	1	1	1	2	1	1	22
OG0000697	SnoaL-like domain	IPR009959	2	1	1	1	3	1	1	1	1	1	1	1	1	1	1	1	1	1	1	22
OG0000698	ARID/BRIGHT DNA binding domain	IPR001606	3	1	1	1	2	1	1	1	1	1	1	1	1	1	1	1	1	1	1	22
OG0000699	Enoyl-(Acyl carrier protein) reductase		2	1	1	1	2	1	1	1	1	1	1	1	1	1	1	1	2	1	1	22
OG0000700	Domain of unknown function (DUF3381)	IPR024576	1	2	2	1	1	1	1	1	1	1	1	1	1	2	1	1	1	1	1	22
OG0000701	putative amidase	IPR000120|IPR020556|IPR023631|IPR036928	1	2	2	2	0	0	0	0	0	0	0	2	2	2	3	3	0	2	1	22
OG0000702	BPG-independent PGAM N-terminus (iPGM_N)	IPR011258	2	1	1	1	2	2	1	1	1	1	1	1	1	1	1	1	1	1	1	22
OG0000703	hypothetical protein PV08_02279	IPR001509|IPR036291	2	2	2	2	1	0	0	0	0	0	0	2	2	2	2	2	0	2	1	22
OG0000704	FAD dependent oxidoreductase	IPR006076	1	1	1	1	2	2	1	1	1	1	1	1	1	1	1	1	3	1	0	22
OG0000705	Beta-galactosidase jelly roll domain	IPR025300	2	1	1	1	1	3	1	1	1	1	1	1	1	1	1	1	1	1	1	22
OG0000706	Cytochrome P450	IPR001128	3	1	1	1	2	1	1	1	1	1	1	1	1	1	1	1	1	1	1	22
OG0000707	Casein kinase substrate phosphoprotein PP28	IPR019380	3	1	1	1	2	1	1	1	1	1	1	1	1	1	1	1	1	1	1	22
OG0000708	Enoyl-(Acyl carrier protein) reductase		1	2	1	1	1	1	1	1	1	1	1	1	1	1	2	1	2	1	1	22
OG0000709	Phosphoenolpyruvate/pyruvate domain-containing protein	IPR015813|IPR039556|IPR040442	1	2	2	2	1	0	0	0	0	0	0	2	2	2	2	2	0	2	2	22
OG0000710	Enoyl-(Acyl carrier protein) reductase		1	1	1	1	1	2	1	1	1	1	1	1	1	1	1	1	1	1	3	22
OG0000711	putative phytanoyl- dioxygenase family protein	IPR008775	1	2	2	2	1	0	0	0	0	0	0	2	2	2	2	2	0	2	2	22
OG0000712	FHA domain	IPR000253	1	1	2	1	1	1	1	1	1	1	1	1	2	2	1	1	1	1	1	22
OG0000713	FtsJ-like methyltransferase	IPR002877	4	1	1	1	1	1	1	1	1	1	1	1	1	1	1	1	1	1	1	22
OG0000714	Ras family	IPR001806	3	1	1	1	2	1	1	1	1	1	1	1	1	1	1	1	1	1	1	22
OG0000715	hypothetical protein PV08_05005		2	1	1	1	4	1	1	1	1	0	1	1	1	1	1	1	1	1	1	22
OG0000716	ICP0-binding domain of Ubiquitin-specific protease 7	IPR024729	2	1	1	1	3	1	1	1	1	1	1	1	1	1	1	1	1	1	1	22
OG0000717	Eukaryotic initiation factor 4E	IPR001040	1	1	1	1	3	1	1	1	1	1	1	1	1	1	1	1	1	2	1	22
OG0000718	CorA-like Mg2+ transporter protein	IPR002523	4	1	1	0	1	2	1	1	1	1	1	1	1	1	1	1	1	1	1	22
OG0000719	Protein kinase domain	IPR000719	2	1	1	1	1	1	1	1	1	1	1	1	1	1	1	1	2	2	1	22
OG0000720	Cytoskeletal-regulatory complex EF hand	IPR000261	1	1	1	1	4	1	1	1	1	1	1	1	1	1	1	1	1	1	1	22
OG0000721	Actin	IPR004000	1	1	1	1	4	1	1	1	1	1	1	1	1	1	1	1	1	1	1	22
OG0000722	Isochorismatase family	IPR000868	1	1	1	1	4	1	1	1	1	1	1	1	1	1	1	1	1	1	1	22
OG0000723	3-beta hydroxysteroid dehydrogenase/isomerase family	IPR002225	4	1	1	1	1	1	1	1	1	1	1	1	1	1	1	1	1	1	1	22
OG0000724	Major Facilitator Superfamily	IPR011701	2	1	1	1	3	1	1	1	1	1	1	1	1	1	1	1	1	1	1	22
OG0000725	Gamma interferon inducible lysosomal thiol reductase (GILT)	IPR004911	4	1	1	1	1	1	1	1	1	1	1	1	1	1	1	1	1	1	1	22
OG0000726	Aldo/keto reductase family	IPR023210	3	1	1	1	2	1	1	1	1	1	1	1	1	1	1	1	1	1	1	22
OG0000727	Beta-lactamase superfamily domain	IPR001279	2	1	1	1	2	2	1	1	1	1	1	1	1	1	1	1	1	1	1	22
OG0000728	C-terminal topoisomerase domain	IPR025834	2	1	1	1	2	1	1	1	1	1	1	1	1	1	1	1	2	1	1	22
OG0000729	POT family	IPR000109	2	1	1	1	1	1	1	1	1	1	1	1	1	1	1	1	1	1	3	22
OG0000730	Actin interacting protein 3	IPR022782	2	1	1	1	2	1	1	1	1	1	1	1	1	1	1	1	2	1	1	22
OG0000731	La domain	IPR006630	2	1	1	1	3	1	1	1	1	1	1	1	1	1	1	1	1	1	1	22
OG0000732	Catalytic LigB subunit of aromatic ring-opening dioxygenase	IPR004183	2	1	1	1	2	1	1	1	1	1	1	1	1	1	1	1	2	1	1	22
OG0000733	Histidine kinase-, DNA gyrase B-, and HSP90-like ATPase	IPR003594	3	1	1	1	1	2	1	1	1	1	1	1	1	1	1	1	1	1	1	22
OG0000734	emp24/gp25L/p24 family/GOLD	IPR009038	3	1	1	1	2	1	1	1	1	1	1	1	1	1	1	1	1	1	1	22
OG0000735	Enoyl-(Acyl carrier protein) reductase		2	1	1	1	1	1	1	1	1	1	1	1	1	1	1	1	3	1	1	22
OG0000736	Calcineurin-like phosphoesterase	IPR004843	2	1	1	1	3	1	1	1	1	1	1	1	1	1	1	1	1	1	1	22
OG0000737	CUE domain	IPR003892	1	1	1	2	1	2	1	1	1	1	1	1	1	2	1	1	1	1	1	22
OG0000738	Myb-like DNA-binding domain	IPR001005	1	3	2	1	1	1	1	1	1	1	1	1	1	1	1	1	1	1	1	22
OG0000739	Queuine tRNA-ribosyltransferase	IPR002616	3	1	1	1	1	2	1	1	1	1	1	1	1	1	1	1	1	1	1	22
OG0000740	Phosphomethylpyrimidine kinase	IPR013749	2	1	1	1	3	1	1	1	1	1	1	1	1	1	1	1	1	1	1	22
OG0000741	ATP-dependent protease La (LON) substrate-binding domain	IPR003111	2	1	1	1	2	1	1	1	1	1	1	1	1	1	1	1	2	1	1	22
OG0000742	MaoC like domain	IPR002539	1	2	1	1	1	1	1	1	1	1	1	1	1	1	2	1	1	1	2	22
OG0000743	Domain of unknown function (DUF202)	IPR003807	3	1	1	1	2	1	1	1	1	1	1	1	1	1	1	1	1	1	1	22
OG0000744	FAD/NAD(P)-binding protein	IPR002938|IPR036188	1	2	2	2	1	0	0	0	0	0	0	2	2	2	2	2	0	2	2	22
OG0000745	NOT2 / NOT3 / NOT5 family	IPR007282	2	1	1	1	3	1	1	1	1	1	1	1	1	1	1	1	1	1	1	22
OG0000746	Cytochrome P450	IPR001128	1	1	2	1	1	1	1	1	1	1	1	1	2	2	1	1	1	1	1	22
OG0000747	Fungal specific transcription factor domain	IPR007219	2	1	0	0	3	2	2	2	2	2	2	0	0	1	0	0	2	0	1	22
OG0000748	Bacterial transferase hexapeptide (six repeats)	IPR001451	3	1	1	1	2	1	1	1	1	1	1	1	1	1	1	1	1	1	1	22
OG0000749	Amidase	IPR023631	2	1	2	1	1	1	1	1	1	1	1	1	1	2	1	1	1	1	1	22
OG0000750	general substrate transporter	IPR003663|IPR005828|IPR005829|IPR020846|IPR036259	3	3	2	2	0	0	0	0	0	0	0	2	2	2	1	2	0	2	1	22
OG0000751	DEAD_2	IPR010614	1	1	1	1	0	2	1	1	1	2	1	1	1	1	1	1	2	1	2	22
OG0000752	Phosphate transporter family	IPR001204	1	1	1	1	2	1	1	1	1	1	0	1	1	1	1	1	1	1	4	22
OG0000753	FAD dependent oxidoreductase	IPR006076	2	1	1	1	2	1	1	1	1	1	1	1	1	1	1	1	1	1	2	22
OG0000754	alcohol dehydrogenase GroES domain protein	IPR002328|IPR011008|IPR011032|IPR013149|IPR013154|IPR020843|IPR036291	1	1	1	2	1	0	0	0	0	0	0	2	4	2	2	2	0	2	2	22
OG0000755			2	1	1	1	3	1	1	1	1	1	1	1	1	1	1	1	1	1	1	22
OG0000756	Zinc-finger double-stranded RNA-binding	IPR022755	2	1	1	1	2	1	1	1	1	1	1	1	1	1	1	1	2	1	1	22
OG0000757	Fungal specific transcription factor domain-containing protein	IPR007219|IPR013087|IPR036236	2	1	2	2	1	0	0	0	0	0	0	2	2	2	2	2	0	2	2	22
OG0000758	RNA recognition motif. (a.k.a. RRM, RBD, or RNP domain)	IPR000504	3	1	1	1	2	1	1	1	1	1	1	1	1	1	1	1	1	1	1	22
OG0000759	Cyanate lyase C-terminal domain	IPR003712	1	1	1	1	1	1	1	2	1	1	2	1	1	1	1	1	2	1	1	22
OG0000760	Protein of unknown function (DUF3500)	IPR021889	1	1	1	1	1	1	1	1	1	1	1	1	1	1	1	2	1	1	3	22
OG0000761	Alcohol dehydrogenase GroES-like domain	IPR013154	1	2	1	1	1	1	1	1	1	1	1	1	2	1	2	1	1	1	1	22
OG0000762	Actin	IPR004000	1	1	1	1	4	1	1	1	1	1	1	1	1	1	1	1	1	1	1	22
OG0000763	MFS transporter	IPR011701|IPR020846|IPR036259	1	2	2	2	0	0	0	0	0	0	0	2	2	2	2	2	0	3	2	22
OG0000764	Alpha amylase, catalytic domain	IPR006047	4	1	1	1	1	1	1	1	1	1	1	1	1	1	1	1	1	1	1	22
OG0000765	PPP4R2	IPR015267	2	1	1	1	3	1	1	1	1	1	1	1	1	1	1	1	1	1	1	22
OG0000766	Alcohol dehydrogenase GroES-like domain	IPR013154	3	1	1	1	2	1	1	1	1	1	1	1	1	1	1	1	1	1	1	22
OG0000767	Methyltransferase domain		1	1	1	1	2	1	1	1	1	1	1	1	1	1	1	1	3	1	1	22
OG0000768	Phosphotransferase enzyme family	IPR002575	2	1	1	1	2	1	1	1	1	1	1	1	1	1	1	1	2	1	1	22
OG0000769	Fes/CIP4, and EFC/F-BAR homology domain	IPR001060	4	1	1	1	1	1	1	1	1	1	1	1	1	1	1	1	1	1	1	22
OG0000770	G-patch domain	IPR000467	3	0	1	1	3	1	1	1	1	1	1	1	1	1	1	1	1	1	1	22
OG0000771	6-phosphogluconate dehydrogenase, C-terminal domain	IPR006114	2	1	1	1	3	1	1	1	1	1	1	1	1	1	1	1	1	1	1	22
OG0000772	6-phosphofructo-2-kinase	IPR013079	4	1	1	1	1	1	1	1	1	1	1	1	1	1	1	1	1	1	1	22
OG0000773	Cytochrome P450	IPR001128	0	1	1	1	1	1	1	1	1	1	1	1	1	1	1	2	1	1	4	22
OG0000774	Glycosyl transferases group 1		0	1	1	1	0	1	1	1	1	1	1	2	2	2	2	2	1	2	0	22
OG0000775	HCNGP-like protein	IPR012479	0	5	1	1	4	1	1	0	1	0	0	1	0	1	1	2	0	3	0	22
OG0000776	Protein of unknown function (DUF861)	IPR008579	0	1	1	1	1	2	2	1	2	1	2	1	1	1	1	1	2	1	0	22
OG0000777	Zn(2)-C6 fungal-type DNA-binding domain	IPR001138|IPR007219|IPR036864	0	2	2	2	2	0	0	0	0	0	0	2	1	2	2	4	0	2	1	22
OG0000778	Fungal Zn(2)-Cys(6) binuclear cluster domain	IPR001138	0	1	1	2	1	1	1	1	1	1	1	2	1	1	2	2	1	2	0	22
OG0000779	FAD binding domain	IPR003097	0	1	1	1	0	2	2	1	2	1	2	1	1	1	1	1	2	1	1	22
OG0000780	DASH complex subunit Dad4	IPR013959	0	1	1	1	1	3	1	1	1	2	1	1	1	1	1	1	2	1	1	22
OG0000781	Domain of unknown function (DUF4782)	IPR031968	0	0	1	1	2	1	1	1	1	1	1	2	2	2	1	1	1	2	1	22
OG0000782	SPFH domain / Band 7 family	IPR001107	2	1	1	1	1	1	1	1	1	1	1	1	1	1	1	1	2	1	1	21
OG0000783	Dual specificity phosphatase, catalytic domain	IPR000340	3	1	1	1	1	1	1	1	1	1	1	1	1	1	1	1	1	1	1	21
OG0000784	Methyltransferase domain		2	1	1	1	2	1	1	1	1	1	1	1	1	1	1	1	1	1	1	21
OG0000785	Zinc-finger of C2H2 type		3	1	1	1	1	1	1	1	1	1	1	1	1	1	1	1	1	1	1	21
OG0000786	Alcohol dehydrogenase GroES-like domain	IPR013154	3	2	0	1	1	1	1	1	1	1	1	1	1	1	1	0	1	1	2	21
OG0000787	Fungal specific transcription factor domain	IPR021858	2	1	1	1	1	2	1	1	1	1	1	1	1	1	1	1	1	1	1	21
OG0000788	BAH domain	IPR001025	2	1	1	1	2	1	1	1	1	1	1	1	1	1	1	1	1	1	1	21
OG0000789	Forkhead domain	IPR001766	3	1	1	1	1	1	1	1	1	1	1	1	1	1	1	1	1	1	1	21
OG0000790	MCM N-terminal domain	IPR027925	2	1	1	1	1	2	1	1	1	1	1	1	1	1	1	1	1	1	1	21
OG0000791	Glycosyltransferase family 25 (LPS biosynthesis protein)	IPR002654	3	1	1	1	1	1	1	1	1	1	1	1	1	2	1	1	1	1	0	21
OG0000792	PRP1 splicing factor, N-terminal	IPR010491	1	1	1	1	2	1	1	1	1	1	1	1	1	1	1	1	2	1	1	21
OG0000793	Cnl2/NKP2 family protein	IPR018565	2	1	1	1	1	2	1	1	1	1	1	1	1	1	1	1	1	1	1	21
OG0000794	ATPase family associated with various cellular activities (AAA)	IPR003959	3	1	1	1	1	1	1	1	1	1	1	1	1	1	1	1	1	1	1	21
OG0000795	NADH:flavin oxidoreductase / NADH oxidase family	IPR001155	2	1	1	1	2	1	1	1	1	1	1	1	1	1	1	1	1	1	1	21
OG0000796	Alcohol dehydrogenase GroES-like domain	IPR013154	2	1	1	1	1	1	1	1	1	1	1	1	1	1	1	1	2	1	1	21
OG0000797	Protein-tyrosine phosphatase	IPR000242	1	1	1	1	3	1	1	1	1	1	1	1	1	1	1	1	1	1	1	21
OG0000798	Peptidyl-tRNA hydrolase PTH2	IPR002833	2	1	1	1	1	2	1	1	1	1	1	1	1	1	1	1	1	1	1	21
OG0000799	Alcohol acetyltransferase	IPR010828	1	1	1	1	1	2	1	1	1	1	1	1	1	1	1	1	1	1	2	21
OG0000800	Amidase	IPR023631	2	1	1	1	2	1	1	1	1	1	1	1	1	1	1	1	1	1	1	21
OG0000801	DASH complex subunit Ask1	IPR013964	1	1	1	1	3	1	1	1	1	1	1	1	1	1	1	1	1	1	1	21
OG0000802	Cytochrome b5-like Heme/Steroid binding domain	IPR001199	1	1	1	1	3	1	1	1	1	1	1	1	1	1	1	1	1	1	1	21
OG0000803	Exonuclease	IPR013520	2	1	1	1	2	1	1	1	1	1	1	1	1	1	1	1	1	1	1	21
OG0000804	Beta galactosidase small chain	IPR004199	1	1	1	1	2	1	1	1	1	1	1	1	1	1	1	1	1	1	2	21
OG0000805	Alcohol dehydrogenase GroES-like domain	IPR013154	2	1	1	1	2	1	1	1	1	1	1	1	1	1	1	1	1	1	1	21
OG0000806	Isocitrate lyase family	IPR006254	2	1	1	1	2	1	1	1	1	1	1	1	1	1	1	1	1	1	1	21
OG0000807	Helix-loop-helix DNA-binding domain	IPR011598	1	1	1	1	3	1	1	1	1	1	1	1	1	1	1	1	1	1	1	21
OG0000808	ABC transporter	IPR003439	2	1	1	1	2	1	1	1	1	1	1	1	1	1	1	1	1	1	1	21
OG0000809	CCAAT-binding transcription factor (CBF-B/NF-YA) subunit B	IPR001289	2	1	1	1	2	1	1	1	1	1	1	1	1	1	1	1	1	1	1	21
OG0000810		IPR026286	2	2	2	2	1	0	0	0	0	0	0	2	2	2	2	2	0	2	0	21
OG0000811	Ribosomal L15	IPR000439	1	0	0	0	2	1	1	2	1	2	1	1	1	1	1	1	1	2	2	21
OG0000812	Glutathione S-transferase, C-terminal domain		1	1	1	1	3	1	1	1	1	1	1	1	1	1	1	1	1	1	1	21
OG0000813	Domain of unknwon function (DUF3824)	IPR024436	2	2	1	1	1	1	1	1	1	1	1	1	1	1	1	1	1	1	1	21
OG0000814	Dos2-interacting transcription regulator of RNA-Pol-II		3	1	1	1	1	1	1	1	1	1	1	1	1	1	1	1	1	1	1	21
OG0000815	Major Facilitator Superfamily	IPR011701	1	1	1	1	1	3	1	1	1	1	1	1	1	1	1	1	1	1	1	21
OG0000816	Calpain family cysteine protease	IPR001300	2	1	1	1	1	2	1	1	1	1	1	1	1	1	1	1	1	1	1	21
OG0000817	Protein of unknown function (DUF726)	IPR007941	3	1	1	1	1	1	1	1	1	1	1	1	1	1	1	1	1	1	1	21
OG0000818	Fasciclin domain	IPR000782	1	1	1	1	1	1	1	2	1	2	1	1	1	1	1	1	1	1	1	21
OG0000819	Mitochondrial carrier protein	IPR018108	1	1	1	1	3	1	1	1	1	1	1	1	1	1	1	1	1	1	1	21
OG0000820	Pyridoxamine 5'-phosphate oxidase	IPR011576	1	1	1	1	1	3	1	1	1	1	1	1	1	1	1	1	1	1	1	21
OG0000821	Acyltransferase family	IPR002656	2	1	1	1	1	2	1	1	1	1	1	1	1	1	1	1	1	1	1	21
OG0000822	Mitochondrial carrier protein	IPR018108	2	1	1	1	2	1	1	1	1	1	1	1	1	1	1	1	1	1	1	21
OG0000823	DDE superfamily endonuclease		1	2	1	2	1	1	1	1	1	1	1	1	1	1	1	1	1	1	1	21
OG0000824	HMGL-like	IPR000891	1	1	1	1	1	1	1	1	1	1	1	1	1	1	2	2	1	1	1	21
OG0000825	Helix-loop-helix DNA-binding domain	IPR011598	2	1	1	1	1	1	1	1	1	1	1	1	1	1	1	1	1	1	2	21
OG0000826	Cell morphogenesis C-terminal	IPR025481	1	1	1	1	1	3	1	1	1	1	1	2	1	1	1	1	1	1	0	21
OG0000827	Ankyrin repeats (3 copies)	IPR020683	1	1	1	1	3	1	1	1	1	1	1	1	1	1	1	1	1	1	1	21
OG0000828	Las17-binding protein actin regulator	IPR007461	2	1	1	1	2	1	1	1	1	1	1	1	1	1	1	1	1	1	1	21
OG0000829			2	1	1	1	2	1	1	1	1	1	1	1	1	1	1	1	1	1	1	21
OG0000830	Domain of unknown function (DUF4187)	IPR025239	2	1	1	1	2	1	1	1	1	1	1	1	1	1	1	1	1	1	1	21
OG0000831	Major Facilitator Superfamily	IPR011701	1	1	1	1	2	1	1	1	1	1	1	1	1	1	2	1	1	1	1	21
OG0000832	Fip1 motif	IPR007854	2	1	1	1	2	1	1	1	1	1	1	1	1	1	1	1	1	1	1	21
OG0000833	FAD binding domain	IPR003953	1	0	1	1	2	1	1	1	1	1	1	1	1	1	1	1	1	1	3	21
OG0000834	Alcohol dehydrogenase GroES-like domain	IPR013154	1	1	1	1	3	1	1	1	1	1	1	1	1	1	1	1	1	1	1	21
OG0000835	Eukaryotic protein of unknown function (DUF846)	IPR008564	1	1	1	1	2	2	1	1	1	1	1	1	1	1	1	1	1	1	1	21
OG0000836	NADH:flavin oxidoreductase / NADH oxidase family	IPR001155	1	1	1	1	1	3	1	1	1	1	1	1	1	1	1	1	1	1	1	21
OG0000837	Major Facilitator Superfamily	IPR011701	1	1	1	1	2	2	1	1	1	1	1	1	1	1	1	1	1	1	1	21
OG0000838	Exonuclease V - a 5' deoxyribonuclease	IPR019190	1	1	1	1	1	3	1	1	1	1	1	1	1	1	1	1	1	1	1	21
OG0000839	AMP-binding enzyme	IPR000873	2	1	1	1	2	1	1	1	1	1	1	1	1	1	1	1	1	1	1	21
OG0000840			1	2	3	2	1	0	0	0	0	0	0	2	2	2	2	2	0	2	0	21
OG0000841	BUD22	IPR015158	2	1	1	1	2	1	1	1	1	1	1	1	1	1	1	1	1	1	1	21
OG0000842	CFEM domain	IPR008427	1	1	1	1	1	1	1	1	1	1	1	1	1	1	1	1	1	1	3	21
OG0000843	NAD(P)H-binding	IPR016040	3	1	1	1	2	1	1	1	1	1	1	1	1	1	1	1	1	0	1	21
OG0000844	Transcription factor TFIID (or TATA-binding protein, TBP)	IPR000814	2	1	1	1	2	1	1	1	1	1	1	1	1	1	1	1	1	1	1	21
OG0000845	alpha/beta hydrolase fold	IPR013094	3	1	1	1	0	1	1	1	1	1	1	1	1	1	1	1	1	1	2	21
OG0000846	Alcohol dehydrogenase GroES-like domain	IPR013154	1	2	2	1	1	1	1	1	1	1	1	1	1	1	1	1	1	1	1	21
OG0000847	Phosphatidylserine decarboxylase	IPR003817	2	1	1	1	2	1	1	1	1	1	1	1	1	1	1	1	1	1	1	21
OG0000848	Fungal protein of unknown function (DUF1774)	IPR013920	1	1	1	1	3	1	1	1	1	1	1	1	1	1	1	1	1	1	1	21
OG0000849			1	1	1	1	2	1	1	1	1	1	1	1	1	1	1	1	1	1	2	21
OG0000850	Reticulon	IPR003388	2	1	1	1	2	1	1	1	1	1	1	1	1	1	1	1	1	1	1	21
OG0000851	ABC transporter	IPR003439	1	1	1	1	3	1	1	1	1	1	1	1	1	1	1	1	1	1	1	21
OG0000852	Phosphate transport (Pho88)	IPR019263	1	1	1	1	1	2	1	1	1	1	1	1	1	1	1	1	2	1	1	21
OG0000853	Dienelactone hydrolase family	IPR002925	2	1	1	1	1	1	1	1	1	1	1	1	1	1	1	1	1	1	2	21
OG0000854	C-terminal associated domain of TOPRIM	IPR031660	2	1	1	1	2	1	1	1	1	1	1	1	1	1	1	1	1	1	1	21
OG0000855	DnaJ domain	IPR001623	3	1	1	1	1	1	1	1	1	1	1	1	1	1	1	1	1	1	1	21
OG0000856	Ankyrin repeats (3 copies)	IPR020683	2	1	1	1	2	1	1	1	1	1	1	1	1	1	1	1	1	1	1	21
OG0000857	ABC transporter	IPR003439	2	1	1	1	2	1	1	1	1	1	1	1	1	1	1	1	1	1	1	21
OG0000858	Alpha/beta hydrolase family	IPR000073	1	1	2	1	1	1	1	1	1	1	0	1	3	2	1	1	1	1	0	21
OG0000859	Calcineurin-like phosphoesterase	IPR004843	1	1	1	1	3	1	1	1	1	1	1	1	1	1	1	1	1	1	1	21
OG0000860	Dienelactone hydrolase family	IPR002925	2	1	1	1	2	1	1	1	1	1	1	1	1	1	1	1	1	1	1	21
OG0000861	Haloacid dehalogenase-like hydrolase	IPR023214	1	1	1	1	1	3	1	1	1	1	1	1	1	1	1	1	1	1	1	21
OG0000862	NADH:flavin oxidoreductase / NADH oxidase family	IPR001155	1	1	1	1	1	1	1	1	1	1	1	1	2	2	1	1	1	1	1	21
OG0000863	Cytochrome c oxidase assembly protein CtaG/Cox11	IPR007533	2	1	1	1	2	1	1	1	1	1	1	1	1	1	1	1	1	1	1	21
OG0000864	Aminotransferase class I and II	IPR004839	1	1	1	1	3	1	1	1	1	1	1	1	1	1	1	1	1	1	1	21
OG0000865	Carbon-nitrogen hydrolase	IPR003010	2	1	3	1	2	1	1	1	1	1	1	1	1	1	1	0	1	0	1	21
OG0000866	MAS20 protein import receptor	IPR002056	1	1	1	1	1	3	1	1	1	1	1	1	1	1	1	1	1	1	1	21
OG0000867	Domain of unknown function (DUF2014)	IPR019006	2	1	1	1	2	1	1	1	1	1	1	1	1	1	1	1	1	1	1	21
OG0000868	Aldehyde reductase II	IPR002225|IPR036291	2	1	2	2	2	0	0	0	0	0	0	2	2	2	1	4	0	1	0	21
OG0000869	Ubiquitin family	IPR000626	2	1	1	1	2	1	1	1	1	1	1	1	1	1	1	1	1	1	1	21
OG0000870	DnaJ domain	IPR001623	3	1	1	1	2	1	1	1	1	1	1	1	1	1	1	1	1	1	0	21
OG0000871	bZIP transcription factor	IPR004827	3	1	1	1	1	1	1	1	1	1	1	1	1	1	1	1	1	1	1	21
OG0000872	Protein kinase domain	IPR000719	1	1	0	1	7	1	1	1	1	1	1	1	0	0	0	1	1	1	1	21
OG0000873	ENTH domain	IPR013809	2	1	1	1	1	2	1	1	1	1	1	1	1	1	1	1	1	1	1	21
OG0000874	Ribosomal protein L7Ae/L30e/S12e/Gadd45 family	IPR004038	2	1	1	1	2	1	1	1	1	1	1	1	1	1	1	1	1	1	1	21
OG0000875	Polysaccharide deacetylase	IPR002509	1	2	2	1	0	1	1	1	1	1	1	1	1	1	1	1	1	2	1	21
OG0000876	Thiamine pyrophosphate enzyme, C-terminal TPP binding domain	IPR011766	1	1	1	1	1	1	1	1	1	1	1	1	1	1	1	1	2	2	1	21
OG0000877	ACT domain	IPR027795	2	1	1	1	1	1	1	1	1	1	1	1	1	1	1	1	1	1	2	21
OG0000878	bZIP transcription factor	IPR004827	2	1	1	1	2	1	1	1	1	1	1	1	1	1	1	1	1	1	1	21
OG0000879	Fibronectin type III-like domain	IPR026891	2	1	1	1	2	1	1	1	1	1	1	1	1	1	1	1	1	1	1	21
OG0000880	CFEM domain	IPR008427	2	1	1	1	2	1	1	1	1	1	1	1	1	1	1	1	1	1	1	21
OG0000881	Carbohydrate/starch-binding module (family 21)	IPR005036	1	1	1	1	3	1	1	1	1	1	1	1	1	1	1	1	1	1	1	21
OG0000882	DnaJ domain	IPR001623	1	1	1	1	1	3	1	1	1	1	1	1	1	1	1	1	1	1	1	21
OG0000883	NADH ubiquinone oxidoreductase subunit NDUFA12	IPR007763	2	1	1	1	2	1	1	1	1	1	1	1	1	1	1	1	1	1	1	21
OG0000884	GAF domain	IPR003018	3	1	1	1	1	1	1	1	1	1	1	1	1	1	1	1	1	1	1	21
OG0000885	Enoyl-(Acyl carrier protein) reductase		3	1	1	1	1	1	1	1	1	1	1	1	1	1	1	1	1	1	1	21
OG0000886	MutS domain III	IPR007696	2	1	1	1	2	1	1	1	1	1	1	1	1	1	1	1	1	1	1	21
OG0000887			1	1	2	1	1	0	0	0	0	0	0	2	3	2	2	2	0	2	2	21
OG0000888	Domain of unknown function (DUF3425)	IPR021833	4	1	1	1	1	1	1	1	1	1	1	1	1	1	1	1	1	1	0	21
OG0000889	F-box-like	IPR001810	1	2	2	1	1	1	1	1	1	1	1	1	1	1	1	1	2	1	0	21
OG0000890	NMT1-like family	IPR011852	2	1	1	1	2	1	1	1	1	1	1	1	1	1	1	1	1	1	1	21
OG0000891	Alpha/beta hydrolase family	IPR000073	1	1	1	1	1	1	1	1	1	1	1	1	1	1	1	2	2	1	1	21
OG0000892	FAD-binding domain	IPR013112	2	1	1	1	2	1	1	1	1	1	1	1	1	1	1	1	1	1	1	21
OG0000893	Ribosomal S3Ae family	IPR001593	2	2	1	1	0	1	1	1	1	1	1	1	1	2	1	1	1	1	1	21
OG0000894	2-oxoglutarate dehydrogenase C-terminal	IPR031717	1	2	1	1	1	1	1	1	1	1	1	1	1	2	1	1	1	1	1	21
OG0000895	Taurine catabolism dioxygenase TauD, TfdA family	IPR003819	2	1	1	1	2	1	1	1	1	1	1	1	1	1	1	1	1	1	1	21
OG0000896	Amidohydrolase	IPR006680	4	1	1	1	0	1	1	1	1	1	1	1	1	1	1	2	1	1	0	21
OG0000897	Mannosyltransferase (PIG-M)	IPR007704	2	1	1	1	1	1	1	1	1	2	2	1	1	1	1	1	1	1	0	21
OG0000898	HECT-domain (ubiquitin-transferase)	IPR000569	2	1	1	1	2	1	1	1	1	1	1	1	1	1	1	1	1	1	1	21
OG0000899	3-dehydroquinate synthase	IPR030960	3	1	1	1	2	1	1	1	1	1	1	1	1	1	1	1	1	1	0	21
OG0000900	Bacterial transferase hexapeptide (six repeats)	IPR001451	2	1	1	1	2	1	1	1	1	1	1	1	1	1	1	1	1	1	1	21
OG0000901	ARID/BRIGHT DNA binding domain	IPR001606	1	1	1	1	1	1	1	1	1	1	1	1	1	1	1	1	1	1	3	21
OG0000902	Sugar (and other) transporter	IPR005828	1	1	1	1	3	1	1	1	1	1	1	1	1	1	1	1	1	1	1	21
OG0000903	Methyltransferase domain		3	1	1	1	1	1	1	1	1	1	1	1	1	1	1	1	1	1	1	21
OG0000904	Heterokaryon incompatibility protein (HET)	IPR010730	1	1	1	1	1	1	1	1	1	1	1	1	2	2	1	1	1	1	1	21
OG0000905	Glycerophosphoryl diester phosphodiesterase family	IPR030395	1	1	1	1	1	3	1	1	1	1	1	1	1	1	1	1	1	1	1	21
OG0000906	Dual specificity phosphatase, catalytic domain	IPR000340	1	1	1	1	1	3	1	1	1	1	1	1	1	1	1	1	1	1	1	21
OG0000907	Hsp70 protein	IPR013126	2	1	1	1	1	2	1	1	1	1	1	1	1	1	1	1	2	1	0	21
OG0000908	Glycosyl hydrolases family 28	IPR000743	3	1	1	1	0	1	1	1	1	1	1	1	1	1	1	1	1	1	2	21
OG0000909	BTB/POZ domain	IPR000210	1	1	1	1	2	2	1	1	1	1	1	1	1	1	1	2	1	1	0	21
OG0000910	Magnesium transporter NIPA	IPR008521	1	1	1	1	2	1	1	1	1	1	1	1	1	1	1	1	2	1	1	21
OG0000911	Helicase associated domain (HA2)	IPR007502	1	1	1	1	1	2	1	1	1	1	1	1	1	1	1	1	2	1	1	21
OG0000912	Enoyl-(Acyl carrier protein) reductase		1	1	1	1	1	3	1	1	1	1	1	1	1	1	1	1	1	1	1	21
OG0000913	F-box-like	IPR001810	1	1	1	1	1	3	1	1	1	1	1	1	1	1	1	1	1	1	1	21
OG0000914	AMP-binding enzyme	IPR000873	2	1	1	1	0	1	1	1	1	1	1	1	1	1	1	1	3	1	1	21
OG0000915	Nudix hydrolase 14, chloroplastic	IPR000086|IPR015797	2	2	2	2	1	0	0	0	0	0	0	2	1	2	2	2	0	2	1	21
OG0000916	Fungal Zn(2)-Cys(6) binuclear cluster domain	IPR001138	2	1	1	1	2	1	1	1	1	1	1	1	1	1	1	1	1	1	1	21
OG0000917	SUR7/PalI family	IPR009571	1	1	1	1	1	1	1	1	1	2	2	1	1	1	1	1	1	1	1	21
OG0000918	Fungal trichothecene efflux pump (TRI12)	IPR010573	1	1	1	1	1	1	1	1	1	1	1	1	1	1	1	1	1	1	3	21
OG0000919	AMP-binding enzyme	IPR000873	1	1	1	1	1	1	1	1	1	1	1	1	1	1	1	1	2	1	2	21
OG0000920	Acetyltransferase (GNAT) family	IPR000182	1	1	1	1	1	2	1	1	1	1	1	1	1	1	1	1	2	1	1	21
OG0000921	Aldehyde dehydrogenase family	IPR015590	1	2	2	1	0	1	1	1	1	1	1	1	1	1	1	2	1	2	0	21
OG0000922	Gamma-glutamyltranspeptidase	IPR000101	1	1	1	1	1	3	1	1	1	1	1	1	1	1	1	1	1	1	1	21
OG0000923	Domain of unknown function (DUF427)	IPR007361	1	1	1	1	1	3	1	1	1	1	1	1	1	1	1	1	1	1	1	21
OG0000924	SnoaL-like domain	IPR009959	1	1	1	1	2	2	1	1	1	1	1	1	1	1	1	1	1	1	1	21
OG0000925	Fungal protein of unknown function (DUF1752)	IPR013860	2	1	1	1	2	1	1	1	1	1	1	1	1	1	1	1	1	1	1	21
OG0000926	DEAD/DEAH box helicase	IPR011545	3	1	1	1	1	1	1	1	1	1	1	1	1	1	1	1	1	1	1	21
OG0000927	Amino-transferase class IV	IPR001544	1	1	1	1	3	1	1	1	1	1	1	1	1	1	1	1	1	1	1	21
OG0000928	Pumilio-family RNA binding repeat	IPR001313	3	1	1	1	1	1	1	1	1	1	1	1	1	1	1	1	1	1	1	21
OG0000929	Calcineurin-like phosphoesterase	IPR004843	3	1	1	1	1	1	1	1	1	1	1	1	1	1	1	1	1	1	1	21
OG0000930	Pregnancy-associated plasma protein-A	IPR008754	3	1	1	1	1	1	1	1	1	1	1	1	1	1	1	1	1	1	1	21
OG0000931	Polysaccharide deacetylase	IPR002509	3	1	1	1	1	1	1	1	1	1	1	1	1	1	1	1	1	1	1	21
OG0000932	MFS/sugar transport protein		1	1	1	1	1	1	1	1	1	1	1	1	1	1	1	2	2	1	1	21
OG0000933	C2H2 type zinc-finger (2 copies)	IPR015880	1	2	1	1	1	1	1	1	1	1	1	1	1	1	1	2	1	1	1	21
OG0000934	Fungal specific transcription factor domain	IPR007219	1	1	1	1	2	1	1	1	1	1	1	1	1	1	1	1	2	1	1	21
OG0000935	Carbamoyl-phosphate synthase small chain, CPSase domain	IPR002474	1	1	1	1	3	1	1	1	1	1	1	1	1	1	1	1	1	1	1	21
OG0000936	AFG1-like ATPase	IPR005654	1	1	1	1	3	1	1	1	1	1	1	1	1	1	1	1	1	1	1	21
OG0000937	BING4CT (NUC141) domain	IPR012952	2	1	1	1	2	1	1	1	1	1	1	1	1	1	1	1	1	1	1	21
OG0000938	Copper amine oxidase, enzyme domain	IPR015798	1	1	1	1	1	1	1	1	1	2	1	1	1	1	1	1	2	1	1	21
OG0000939	MmgE/PrpD family	IPR005656	2	1	1	1	1	1	1	1	1	1	1	1	1	1	1	1	2	1	1	21
OG0000940	AAA domain		2	1	1	1	1	1	1	1	1	1	1	1	1	1	1	1	2	1	1	21
OG0000941	Eukaryotic aspartyl protease	IPR033121	3	1	1	1	2	1	1	1	1	1	1	1	1	1	1	1	1	1	0	21
OG0000942	D-isomer specific 2-hydroxyacid dehydrogenase, catalytic domain	IPR006139	1	1	1	1	1	2	1	1	1	1	1	1	1	1	1	1	1	1	2	21
OG0000943	Nucleoporin protein Ndc1-Nup	IPR019049	2	1	1	1	2	1	1	1	1	1	1	1	1	1	1	1	1	1	1	21
OG0000944	AMP-binding enzyme	IPR000873	2	1	1	1	2	1	1	1	1	1	1	1	1	1	1	1	1	1	1	21
OG0000945	ATPase family associated with various cellular activities (AAA)	IPR003959	1	1	1	1	3	1	1	1	1	1	1	1	1	1	1	1	1	1	1	21
OG0000946	Cupin	IPR006045	2	1	1	1	1	2	1	1	1	1	1	1	1	1	1	1	1	1	1	21
OG0000947	Protein of unknown function (DUF3237)	IPR020915	2	1	1	1	2	1	1	1	1	1	1	1	1	1	1	1	1	1	1	21
OG0000948	Gamma-glutamyltranspeptidase	IPR000101	2	1	1	1	2	1	1	1	1	1	1	1	1	1	1	1	1	1	1	21
OG0000949	Fungal Zn(2)-Cys(6) binuclear cluster domain	IPR001138	2	1	1	1	2	1	1	1	1	1	1	1	1	1	1	1	1	1	1	21
OG0000950	Sugar (and other) transporter	IPR005828	1	1	1	1	1	1	1	1	2	1	1	1	1	1	1	1	1	1	2	21
OG0000951	Mak16 protein C-terminal region	IPR006958	2	1	1	1	2	1	1	1	1	1	1	1	1	1	1	1	1	1	1	21
OG0000952	Domain of unknown function (DUF4604)	IPR027911	1	1	1	1	2	2	1	1	1	1	1	1	1	1	1	1	1	1	1	21
OG0000953	ASF1 like histone chaperone	IPR006818	1	1	1	1	3	1	1	1	1	1	1	1	1	1	1	1	1	1	1	21
OG0000954	OB-fold nucleic acid binding domain	IPR004365	2	1	1	1	2	1	1	1	1	1	1	1	1	1	1	1	1	1	1	21
OG0000955	Aldehyde dehydrogenase family	IPR015590	2	1	1	1	2	1	1	1	1	1	1	1	1	1	1	1	1	1	1	21
OG0000956	RecF/RecN/SMC N terminal domain	IPR003395	3	1	1	1	1	1	1	1	1	1	1	1	1	1	1	1	1	1	1	21
OG0000957	Cytochrome b5-like Heme/Steroid binding domain	IPR001199	1	1	1	1	2	2	1	1	1	1	1	1	1	1	1	1	1	1	1	21
OG0000958	Isochorismatase family	IPR000868	2	1	1	1	1	1	1	1	1	1	1	1	1	1	1	1	1	1	2	21
OG0000959	Cyclophilin type peptidyl-prolyl cis-trans isomerase/CLD	IPR002130	1	1	1	1	3	1	1	1	1	1	1	1	1	1	1	1	1	1	1	21
OG0000960	Amidohydrolase	IPR006680	3	1	1	1	1	1	1	1	1	1	1	1	1	1	1	1	1	1	1	21
OG0000961	NDT80 / PhoG like DNA-binding family	IPR024061	2	1	1	1	2	1	1	1	1	1	1	1	1	1	1	1	1	1	1	21
OG0000962	Glycosyl transferase family group 2	IPR001173	3	1	1	1	2	1	1	1	1	1	1	1	1	1	1	1	1	1	0	21
OG0000963	Glycosyltransferase family 20	IPR001830	1	1	1	1	2	1	1	1	1	1	1	1	1	1	1	2	1	1	1	21
OG0000964	BTB/POZ domain	IPR000210	2	1	1	1	2	1	1	1	1	1	1	1	1	1	1	1	1	1	1	21
OG0000965	putative oxidoreductase	IPR002347|IPR036291	1	2	2	2	1	0	0	0	0	0	0	2	2	2	2	2	0	2	1	21
OG0000966	Copper amine oxidase, enzyme domain	IPR015798	1	1	1	1	3	1	1	1	1	1	1	1	1	1	1	1	1	1	1	21
OG0000967	Domain of unknown function (DUF3336)	IPR021771	3	1	1	1	1	1	1	1	1	1	1	1	1	1	1	1	1	1	1	21
OG0000968	Mitochondrial carrier protein	IPR018108	1	1	1	1	2	1	1	1	1	1	1	1	1	1	1	1	2	1	1	21
OG0000969	5-carboxymethyl-2-hydroxymuconate isomerase	IPR011234|IPR036663	2	2	2	2	2	0	0	0	0	0	0	2	2	2	1	1	0	1	2	21
OG0000970	ATPase family associated with various cellular activities (AAA)	IPR003959	1	1	2	1	1	1	1	1	1	1	1	1	1	1	1	1	1	2	1	21
OG0000971	CAAX protease self-immunity	IPR003675	3	1	1	1	1	1	1	1	1	1	1	1	1	1	1	1	1	1	1	21
OG0000972	Acyl CoA binding protein	IPR000582	2	1	1	1	1	2	1	1	1	1	1	1	1	1	1	1	1	1	1	21
OG0000973	D-isomer specific 2-hydroxyacid dehydrogenase, catalytic domain	IPR006139	3	2	1	1	1	1	1	1	1	1	1	1	1	1	1	1	1	1	0	21
OG0000974	Choline/Carnitine o-acyltransferase	IPR000542	2	1	1	1	2	1	1	1	1	1	1	1	1	1	1	1	1	1	1	21
OG0000975	Alpha/beta hydrolase of unknown function (DUF1100)	IPR010520	1	1	1	1	3	1	1	1	1	1	1	1	1	1	1	1	1	1	1	21
OG0000976	AMP-binding enzyme	IPR000873	2	1	1	1	1	1	1	1	1	1	1	1	1	1	1	1	1	2	1	21
OG0000977	EamA-like transporter family	IPR000620	1	1	1	1	2	1	1	1	1	1	1	1	1	1	1	1	2	1	1	21
OG0000978	Flavin-binding monooxygenase-like	IPR020946	2	1	1	1	1	2	1	1	1	1	1	1	1	1	1	1	1	1	1	21
OG0000979	ATP-utilising chromatin assembly and remodelling N-terminal	IPR013136	2	1	1	1	2	1	1	1	1	1	1	1	1	1	1	1	1	1	1	21
OG0000980	Kinesin motor domain	IPR001752	2	1	1	1	2	1	1	1	1	1	1	1	1	1	1	1	1	1	1	21
OG0000981	Protein of unknown function (DUF3808)	IPR019412	1	1	1	1	1	1	1	2	1	1	1	1	1	1	1	1	2	1	1	21
OG0000982	Diacylglycerol kinase catalytic domain	IPR001206	2	1	1	1	2	1	1	1	1	1	1	1	1	1	1	1	1	1	1	21
OG0000983	hypothetical protein PV08_08559	IPR013216|IPR029063	1	2	2	1	1	0	0	0	0	0	0	2	2	3	2	2	0	2	1	21
OG0000984	NADH pyrophosphatase zinc ribbon domain	IPR015376	1	1	1	1	2	2	1	1	1	1	1	1	1	1	1	1	1	1	1	21
OG0000985	Exocyst complex component Sec10	IPR009976	1	1	1	1	1	1	1	1	1	1	1	1	1	1	1	1	3	1	1	21
OG0000986	hypothetical protein PV08_08728	IPR005123|IPR026992|IPR027443	1	2	2	2	1	0	0	0	0	0	0	2	2	2	2	2	0	2	1	21
OG0000987	AAA ATPase domain		2	1	1	1	2	2	1	1	1	1	1	1	1	1	1	1	1	1	0	21
OG0000988	Fungal specific transcription factor domain	IPR007219	1	1	1	1	2	1	1	1	1	1	1	1	1	1	1	1	1	1	2	21
OG0000989	2Fe-2S iron-sulfur cluster binding domain		1	1	2	1	1	2	1	1	1	1	2	1	1	1	1	1	1	0	1	21
OG0000990	Catechol dioxygenase N terminus	IPR007535	1	0	0	1	2	1	1	1	1	1	1	1	2	1	2	2	1	1	1	21
OG0000991	Cys/Met metabolism PLP-dependent enzyme	IPR000277	3	1	1	1	1	1	1	1	1	1	1	1	1	1	1	1	1	1	1	21
OG0000992	Acyl-CoA dehydrogenase, C-terminal domain	IPR009075	1	1	1	1	1	1	1	1	1	1	1	1	1	1	1	1	1	1	3	21
OG0000993	Cyclin	IPR013922	2	1	1	1	2	1	1	1	1	1	1	1	1	1	1	1	1	1	1	21
OG0000994	Bacteriorhodopsin-like protein	IPR001425	2	1	1	1	2	1	1	1	1	1	1	1	1	1	1	1	1	1	1	21
OG0000995	Cytochrome b5-like Heme/Steroid binding domain	IPR001199	2	1	1	1	2	1	1	1	1	1	1	1	1	1	1	1	1	1	1	21
OG0000996	Protein-tyrosine phosphatase	IPR000242	2	1	1	1	2	1	1	1	1	1	1	1	1	1	1	1	1	1	1	21
OG0000997	LIM domain	IPR001781	3	1	1	1	1	1	1	1	1	1	1	1	1	1	1	1	1	1	1	21
OG0000998	Vacuolar protein sorting-associated protein 26	IPR028934	2	1	1	1	2	1	1	1	1	1	1	1	1	1	1	1	1	1	1	21
OG0000999	Protein kinase domain	IPR000719	2	1	1	1	2	1	1	1	1	1	1	1	1	1	1	1	1	1	1	21
OG0001000	NUC153 domain	IPR012580	1	1	1	1	4	1	1	1	1	1	1	1	1	1	1	1	0	1	1	21
OG0001001	Methyltransferase domain		2	1	1	1	2	1	1	1	1	1	1	1	1	1	1	1	1	1	1	21
OG0001002	Ubiquitin-2 like Rad60 SUMO-like	IPR022617	1	1	1	1	2	2	1	1	1	1	1	1	1	1	1	1	1	1	1	21
OG0001003	Mis12-Mtw1 protein family	IPR013218	1	1	1	1	1	1	1	1	1	1	1	1	1	1	1	1	3	1	1	21
OG0001004	Alcohol dehydrogenase GroES-like domain	IPR013154	2	1	1	1	2	1	1	1	1	1	1	1	1	1	1	1	1	1	1	21
OG0001005	FAD-binding domain	IPR013112	1	1	1	1	1	1	1	1	1	2	2	1	1	1	1	1	1	1	1	21
OG0001006	ATPase family associated with various cellular activities (AAA)	IPR003959	1	1	1	1	3	1	1	1	1	1	1	1	1	1	1	1	1	1	1	21
OG0001007	related to short-chain alcohol dehydrogenase	IPR002347|IPR036291	1	2	2	2	0	0	0	0	0	0	0	2	2	2	2	2	0	2	2	21
OG0001008	AMP-binding enzyme	IPR000873	2	1	1	1	1	1	1	1	1	1	1	1	1	1	1	1	2	1	1	21
OG0001009	short chain dehydrogenase	IPR002347	2	1	1	1	2	1	1	1	1	1	1	1	1	1	1	1	1	1	1	21
OG0001010	Fungal specific transcription factor domain	IPR007219	2	1	1	1	2	1	1	1	1	1	1	1	1	1	1	1	1	1	1	21
OG0001011	PHD-finger	IPR019787	1	1	1	1	1	3	1	1	1	1	1	1	1	1	1	1	1	1	1	21
OG0001012	UreD urease accessory protein	IPR002669	1	1	1	1	3	1	1	1	1	1	1	1	1	1	1	1	1	1	1	21
OG0001013	Glycosyl hydrolases family 18	IPR001223	2	1	1	1	1	2	1	1	1	1	1	1	1	1	1	1	1	1	1	21
OG0001014	Arrestin (or S-antigen), C-terminal domain	IPR011022	2	1	1	1	3	1	1	1	1	1	0	1	1	1	1	1	1	1	1	21
OG0001015	Enoyl-(Acyl carrier protein) reductase		1	1	1	1	3	1	1	1	1	1	1	1	1	1	1	1	1	1	1	21
OG0001016	Acetyltransferase (GNAT) family	IPR000182	2	1	1	1	1	1	1	1	1	1	1	1	1	1	1	1	2	1	1	21
OG0001017	WD domain, G-beta repeat	IPR001680	1	1	1	1	1	2	1	1	1	1	1	1	1	1	1	1	1	1	2	21
OG0001018	Shwachman-Bodian-Diamond syndrome (SBDS) protein	IPR019783	3	1	1	1	1	1	1	1	1	1	1	1	1	1	1	1	1	1	1	21
OG0001019	F-box-like	IPR001810	1	1	1	1	3	1	1	1	1	1	1	1	1	1	1	1	1	1	1	21
OG0001020	E1-E2 ATPase	IPR008250	1	2	2	1	1	1	1	1	1	1	1	1	1	1	1	1	1	1	1	21
OG0001021	Amino acid permease	IPR004841	1	1	1	1	1	2	1	1	1	1	1	1	1	1	1	1	2	1	1	21
OG0001022	HMG (high mobility group) box	IPR009071	1	1	1	1	1	2	1	1	1	1	1	1	2	1	1	1	1	1	1	21
OG0001023	Shikimate kinase	IPR031322	1	1	1	1	2	1	1	1	1	1	1	1	1	1	1	1	2	1	1	21
OG0001024	Survival motor neuron (SMN) interacting protein 1 (SIP1)		1	1	1	1	2	1	1	1	1	1	1	1	1	1	1	1	2	1	1	21
OG0001025	Alcohol dehydrogenase GroES-like domain	IPR013154	1	2	1	1	1	1	1	1	1	1	1	1	1	1	1	1	1	2	1	21
OG0001026	ATPase family associated with various cellular activities (AAA)	IPR003959	2	1	1	1	2	1	1	1	1	1	1	1	1	1	1	1	1	1	1	21
OG0001027	Major Facilitator Superfamily	IPR011701	1	1	1	1	1	1	1	1	1	1	1	1	1	1	1	1	3	1	1	21
OG0001028	GMC oxidoreductase	IPR000172	2	1	1	1	2	1	1	1	1	1	1	1	1	1	1	1	1	1	1	21
OG0001029	Aldehyde dehydrogenase family	IPR015590	1	2	1	1	1	1	1	1	1	1	1	1	1	2	1	1	1	1	1	21
OG0001030	Mitochondrial ribosomal protein L51 / S25 / CI-B8 domain	IPR007741	3	1	1	1	1	1	1	1	1	1	1	1	1	1	1	1	1	1	1	21
OG0001031	ACT domain	IPR027795	1	1	1	1	1	2	1	1	1	2	1	1	1	1	1	1	1	1	1	21
OG0001032	Hsp20/alpha crystallin family	IPR002068	1	2	1	1	1	1	1	1	1	1	1	1	1	1	1	1	1	1	2	21
OG0001033	Alcohol dehydrogenase GroES-like domain	IPR013154	1	2	1	1	1	1	1	1	1	1	1	1	1	1	1	1	1	1	2	21
OG0001034	putative oxidoreductase	IPR002347|IPR020904|IPR036291	1	2	2	2	1	0	0	0	0	0	0	2	2	2	2	2	0	2	1	21
OG0001035	Casein kinase II regulatory subunit	IPR000704	1	1	1	1	1	1	1	1	1	1	1	1	2	1	1	1	1	1	2	21
OG0001036	RNA recognition motif. (a.k.a. RRM, RBD, or RNP domain)	IPR000504	2	1	1	1	1	1	1	1	1	1	1	1	1	1	1	1	2	1	1	21
OG0001037	Major Facilitator Superfamily	IPR011701	2	1	1	1	0	1	1	1	1	1	1	1	1	1	1	1	3	1	1	21
OG0001038	Fungal specific transcription factor domain	IPR007219	1	1	1	1	3	1	1	1	1	1	1	1	1	1	1	1	1	1	1	21
OG0001039	6-phosphogluconate dehydrogenase, C-terminal domain	IPR006114	1	1	1	1	2	1	1	1	1	1	1	1	1	1	1	1	1	1	2	21
OG0001040	Cytidine and deoxycytidylate deaminase zinc-binding region	IPR002125	1	1	1	1	3	1	1	1	1	1	1	1	1	1	1	1	1	1	1	21
OG0001041	Mitochondrial carrier protein	IPR018108	1	1	1	1	1	2	1	1	1	1	1	1	1	1	1	1	1	1	2	21
OG0001042	Acyl transferase domain	IPR014043	2	1	1	1	1	1	1	1	1	1	1	1	1	1	1	1	2	1	1	21
OG0001043	DNA / pantothenate metabolism flavoprotein	IPR007085	1	1	1	1	1	2	1	1	1	1	2	1	1	1	1	1	1	1	1	21
OG0001044	Transferase family	IPR003480	2	1	1	1	2	1	1	1	1	1	1	1	1	1	1	1	1	1	1	21
OG0001045	Cenp-O kinetochore centromere component	IPR018464	2	1	1	1	2	1	1	1	1	1	1	1	1	1	1	1	1	1	1	21
OG0001046	Fungal domain of unknown function (DUF1712)	IPR013176	3	1	1	1	1	1	1	1	1	1	1	1	1	1	1	1	1	1	1	21
OG0001047	Fungal specific transcription factor domain	IPR007219	1	1	1	1	2	2	1	1	1	1	1	1	1	1	1	1	1	1	1	21
OG0001048	Cytochrome P450	IPR001128	3	1	1	1	2	1	1	1	1	1	0	1	1	1	1	1	1	1	1	21
OG0001049	Regulated-SNARE-like domain	IPR010908	1	1	1	1	3	1	1	1	1	1	1	1	1	1	1	1	1	1	1	21
OG0001050	Actin	IPR004000	1	1	1	1	3	1	1	1	1	1	1	1	1	1	1	1	1	1	1	21
OG0001051	Glutaredoxin-like domain (DUF836)	IPR008554	2	1	1	1	2	1	1	1	1	1	1	1	1	1	1	1	1	1	1	21
OG0001052	Protein kinase domain	IPR000719	3	1	1	1	1	1	1	1	1	1	1	1	1	1	1	1	1	1	1	21
OG0001053	Cytochrome P450	IPR001128	2	1	1	1	2	1	1	1	1	1	1	1	1	1	1	1	1	1	1	21
OG0001054	PWI domain	IPR002483	3	1	1	1	1	1	1	1	1	1	1	1	1	1	1	1	1	1	1	21
OG0001055	2OG-Fe(II) oxygenase superfamily	IPR005123	2	1	1	1	1	1	1	1	1	1	1	1	1	1	1	1	1	1	2	21
OG0001056	Nitronate monooxygenase	IPR004136	1	2	1	1	2	1	1	1	1	1	1	1	1	1	1	1	1	1	1	21
OG0001057	Berberine and berberine like	IPR012951	2	1	1	1	1	1	1	1	1	1	1	1	1	1	1	1	2	1	1	21
OG0001058	Domain found in Dishevelled, Egl-10, and Pleckstrin (DEP)	IPR000591	2	1	1	1	2	1	1	1	1	1	1	1	1	1	1	1	1	1	1	21
OG0001059	Pam16		2	1	1	1	2	1	1	1	1	1	1	1	1	1	1	1	1	1	1	21
OG0001060	PB1 domain	IPR000270	2	1	1	1	2	1	1	1	1	1	1	1	1	1	1	1	1	1	1	21
OG0001061	MCM N-terminal domain	IPR027925	1	1	1	1	2	1	1	1	1	1	1	1	1	1	1	1	2	1	1	21
OG0001062	Cell differentiation family, Rcd1-like		1	1	1	1	1	1	1	1	1	1	2	1	1	1	1	1	1	1	2	21
OG0001063	Phosphoesterase family	IPR007312	2	1	1	1	2	1	1	1	1	1	1	1	1	1	1	1	1	1	1	21
OG0001064	Domain of unknown function (DUF427)	IPR007361	1	1	1	1	3	1	1	1	1	1	1	1	1	1	1	1	1	1	1	21
OG0001065	CUE domain	IPR003892	2	1	1	1	2	1	1	1	1	1	1	1	1	1	1	1	1	1	1	21
OG0001066	Cobalamin synthesis protein cobW C-terminal domain	IPR011629	3	1	1	1	1	1	1	1	1	1	1	1	1	1	1	1	1	1	1	21
OG0001067	Mob1/phocein family	IPR005301	1	1	1	1	3	1	1	1	1	1	1	1	1	1	1	1	1	1	1	21
OG0001068	Homeobox KN domain	IPR008422	2	1	1	1	2	1	1	1	1	1	1	1	1	1	1	1	1	1	1	21
OG0001069	Protein kinase domain	IPR000719	2	1	1	1	2	1	1	1	1	1	1	1	1	1	1	1	1	1	1	21
OG0001070		IPR002347|IPR036291	1	2	2	2	1	0	0	0	0	0	0	2	2	2	2	2	0	2	1	21
OG0001071	2,3-diketo-5-methylthio-1-phosphopentane phosphatase		2	2	1	1	2	0	0	0	0	0	0	1	1	1	1	1	0	1	7	21
OG0001072	EF-hand domain pair	IPR002048	2	1	1	1	2	1	1	1	1	1	1	1	1	1	1	1	1	1	1	21
OG0001073	Cytochrome P450	IPR001128	2	1	1	1	2	1	1	1	1	1	1	1	1	1	1	1	1	1	1	21
OG0001074	Amino acid permease	IPR002293	2	1	1	1	1	2	1	1	1	1	1	1	1	1	1	1	1	1	1	21
OG0001075	Cyclophilin type peptidyl-prolyl cis-trans isomerase/CLD	IPR002130	2	1	1	1	2	1	1	1	1	1	1	1	1	1	1	1	1	1	1	21
OG0001076	D-Tyr-tRNA(Tyr) deacylase	IPR003732	2	1	1	1	2	1	1	1	1	1	1	1	1	1	1	1	1	1	1	21
OG0001077	Alb1	IPR022784	3	1	1	1	1	1	1	1	1	1	1	1	1	1	1	1	1	1	1	21
OG0001078	Histidine-specific methyltransferase, SAM-dependent	IPR019257	2	1	1	1	2	1	1	1	1	1	1	1	1	1	1	1	1	1	1	21
OG0001079	C-terminal duplication domain of Friend of PRMT1	IPR025715	2	1	1	1	2	1	1	1	1	1	1	1	1	1	1	1	1	1	1	21
OG0001080	Acetyl-CoA carboxylase, central region	IPR013537	2	1	1	1	1	2	1	1	1	1	1	1	1	1	1	1	1	1	1	21
OG0001081	Pantoate-beta-alanine ligase	IPR003721	1	1	1	1	1	3	1	1	1	1	1	1	1	1	1	1	1	1	1	21
OG0001082	Zinc-binding dehydrogenase	IPR013149	1	1	1	1	1	3	1	1	1	1	1	1	1	1	1	1	1	1	1	21
OG0001083	Carbon-nitrogen hydrolase	IPR003010	2	1	1	1	2	1	1	1	1	1	1	1	1	1	1	1	1	1	1	21
OG0001084	S-adenosylmethionine synthetase, C-terminal domain	IPR022630	2	1	1	1	2	1	1	1	1	1	1	1	1	1	1	1	1	1	1	21
OG0001085	Thioredoxin	IPR013766	2	1	1	1	2	1	1	1	1	1	1	1	1	1	1	1	1	1	1	21
OG0001086	Glutathione S-transferase, C-terminal domain	IPR004046	1	1	1	1	3	1	1	1	1	1	1	1	1	1	1	1	1	1	1	21
OG0001087	Arrestin (or S-antigen), C-terminal domain	IPR011022	2	1	1	1	2	1	1	1	1	1	1	1	1	1	1	1	1	1	1	21
OG0001088	C2H2 type zinc-finger (2 copies)	IPR015880	1	1	1	1	2	1	1	1	1	1	1	1	1	1	1	1	2	1	1	21
OG0001089	Cryptococcal mannosyltransferase 1	IPR021047	2	1	1	1	2	1	1	1	1	1	1	1	1	1	1	1	1	1	1	21
OG0001090	Alcohol dehydrogenase GroES-like domain	IPR013154	2	1	1	1	2	1	1	1	1	1	1	1	1	1	1	1	1	1	1	21
OG0001091	AMP-binding enzyme	IPR000873	1	1	1	1	3	1	1	1	1	1	1	1	1	1	1	1	1	1	1	21
OG0001092	BRCA1-associated protein 2	IPR011422	2	1	1	1	2	1	1	1	1	1	1	1	1	1	1	1	1	1	1	21
OG0001093	Domain of unknown function (DUF3453)	IPR032460	2	1	1	1	2	1	1	1	1	1	1	1	1	1	1	1	1	1	1	21
OG0001094	Dihydrodipicolinate synthetase family	IPR002220	2	1	1	1	2	1	1	1	1	1	1	1	1	1	1	1	1	1	1	21
OG0001095	Velvet factor	IPR021740	1	1	1	1	2	2	1	1	1	1	1	1	1	1	1	1	1	1	1	21
OG0001096	Proteasome subunit	IPR001353	1	1	1	1	1	2	1	1	1	1	1	1	1	1	1	1	1	1	2	21
OG0001097	Glycosyl transferases group 1	IPR001296	2	1	1	1	2	1	1	1	1	1	1	1	1	1	1	1	1	1	1	21
OG0001098	Luciferase-like monooxygenase	IPR011251	2	1	1	1	1	1	1	1	1	1	1	1	1	1	1	1	2	1	1	21
OG0001099	Dihydrouridine synthase (Dus)	IPR001269	2	1	1	1	2	1	1	1	1	1	1	1	1	1	1	1	1	1	1	21
OG0001100	PRP38 family	IPR005037	3	1	1	1	1	1	1	1	1	1	1	1	1	1	1	1	1	1	1	21
OG0001101	Cation transport protein	IPR003445	1	1	1	1	1	1	1	1	2	1	2	1	1	1	1	1	1	1	1	21
OG0001102	Sugar (and other) transporter	IPR005828	1	1	1	1	2	1	1	1	1	1	1	1	1	1	1	1	2	1	1	21
OG0001103	Thg1 C terminal domain	IPR025845	1	1	1	1	2	2	1	1	1	1	1	1	1	1	1	1	1	1	1	21
OG0001104	Paf1	IPR007133	2	1	1	1	2	1	1	1	1	1	1	1	1	1	1	1	1	1	1	21
OG0001105	Platelet-activating factor acetylhydrolase, isoform II	IPR005065	1	1	1	1	2	2	1	1	1	1	1	1	1	1	1	1	1	1	1	21
OG0001106	Alcohol dehydrogenase GroES-like domain	IPR013154	1	2	1	1	1	1	1	1	1	1	1	1	1	1	1	1	1	2	1	21
OG0001107	Ras family	IPR001806	2	1	1	1	2	1	1	1	1	1	1	1	1	1	1	1	1	1	1	21
OG0001108	Ribosomal S3Ae family	IPR001593	1	2	2	2	0	1	1	1	1	1	1	1	1	1	1	1	1	2	0	21
OG0001109	Alcohol dehydrogenase GroES-like domain	IPR013154	1	2	1	1	1	1	1	1	1	1	1	1	1	1	1	2	1	1	1	21
OG0001110	Alanine dehydrogenase/PNT, N-terminal domain	IPR007886	2	1	1	1	0	1	1	1	1	1	1	2	1	1	1	1	1	2	1	21
OG0001111	Initiation factor 2 subunit family	IPR000649	2	1	1	1	1	1	1	1	1	1	1	1	1	1	1	1	2	1	1	21
OG0001112	Endoribonuclease L-PSP	IPR006175	2	1	1	1	2	1	1	1	1	1	1	1	1	1	1	1	1	1	1	21
OG0001113	AMP-binding enzyme	IPR000873	2	1	1	1	2	1	1	1	1	1	1	1	1	1	1	1	1	1	1	21
OG0001114	CUE domain	IPR003892	1	1	1	1	2	1	1	1	1	1	1	1	1	1	1	1	1	1	2	21
OG0001115	CPSF A subunit region	IPR004871	2	1	1	1	1	1	1	1	1	1	1	1	1	1	1	1	2	1	1	21
OG0001116	GATA zinc finger	IPR000679	2	1	1	1	1	1	1	1	1	1	2	1	1	1	1	1	1	1	1	21
OG0001117	C2 domain	IPR000008	1	1	1	1	3	1	1	1	1	1	1	1	1	1	1	1	1	1	1	21
OG0001118	RIO1 family		2	1	1	1	2	1	1	1	1	1	1	1	1	1	1	1	1	1	1	21
OG0001119	Flavin-binding monooxygenase-like	IPR020946	2	1	1	1	2	1	1	1	1	1	1	1	1	1	1	1	1	1	1	21
OG0001120	Anp1		3	1	1	1	1	1	1	1	1	1	1	1	1	1	1	1	1	1	1	21
OG0001121	ABC1 family	IPR004147	1	1	1	1	1	1	1	1	1	1	2	1	1	1	1	1	2	1	1	21
OG0001122	Domain of unknown function (DUF3425)	IPR021833	2	1	1	1	2	1	1	1	1	1	1	1	1	1	1	1	1	1	1	21
OG0001123	Protein kinase domain	IPR000719	3	1	1	1	1	1	1	1	1	1	1	1	1	1	1	1	1	1	1	21
OG0001124	Catechol dioxygenase N terminus	IPR007535	2	2	1	1	1	1	1	1	1	1	1	1	1	1	1	1	1	1	1	21
OG0001125	CUE domain	IPR003892	1	1	1	1	2	2	1	1	1	1	1	1	1	1	1	1	1	1	1	21
OG0001126	Mitochondrial carrier protein	IPR018108	2	1	1	1	2	1	1	1	1	1	1	1	1	1	1	1	1	1	1	21
OG0001127	Domain of unknown function (DUF4267)	IPR025363	3	1	1	1	1	1	1	1	1	1	1	1	1	1	1	1	1	1	1	21
OG0001128	AMP-binding enzyme	IPR000873	1	1	1	1	2	2	1	1	1	1	1	1	1	1	1	1	1	1	1	21
OG0001129	Acyl-coenzyme A:6-aminopenicillanic acid acyl-transferase	IPR005079	2	1	1	1	2	1	1	1	1	1	1	1	1	1	1	1	1	1	1	21
OG0001130	MFS transporter, SP family, general alpha glucoside:H+ symporter	IPR003663|IPR005828|IPR005829|IPR020846|IPR036259	0	2	2	2	1	0	0	0	0	0	0	2	2	2	2	2	0	2	2	21
OG0001131	Amino acid permease	IPR004841	0	4	0	0	4	2	2	2	2	0	2	0	0	0	0	2	1	0	0	21
OG0001132			0	4	3	3	1	0	0	0	0	0	0	2	2	2	1	2	0	1	0	21
OG0001133		IPR008030|IPR036291	0	2	2	2	2	0	0	0	0	0	0	2	2	2	2	2	0	2	1	21
OG0001134	Beta-lactamase	IPR001466	0	2	1	1	2	1	1	1	1	1	1	1	2	1	1	1	1	1	1	21
OG0001135	Glucanosyltransferase	IPR004886	0	1	2	1	1	1	1	1	1	1	1	1	2	2	1	1	1	1	1	21
OG0001136	Carboxylesterase family	IPR002018	0	1	1	1	1	2	1	2	1	1	1	1	2	1	1	1	1	1	1	21
OG0001137	Coenzyme A transferase	IPR004165	0	1	1	1	2	1	1	1	1	1	1	1	1	1	1	2	1	1	2	21
OG0001138	Protein kinase domain	IPR000719	3	1	1	1	0	1	1	1	1	1	1	1	1	1	1	1	1	1	1	20
OG0001139	Alcohol dehydrogenase GroES-like domain	IPR013154	3	1	1	1	1	1	1	1	1	1	1	1	1	1	1	1	1	1	0	20
OG0001140	6-phosphofructo-2-kinase	IPR013079	2	1	1	1	1	1	1	1	1	1	1	1	1	1	1	1	1	1	1	20
OG0001141	Ankyrin repeats (3 copies)	IPR020683	2	1	1	1	1	1	1	1	1	1	1	1	1	1	1	1	1	1	1	20
OG0001142	Glycosyl hydrolases family 16	IPR000757	2	1	1	1	1	1	1	1	1	1	1	1	1	1	1	1	1	1	1	20
OG0001143	Fungal Zn(2)-Cys(6) binuclear cluster domain	IPR001138	2	1	1	1	1	1	1	1	1	1	1	1	1	1	1	1	0	1	2	20
OG0001144	Isochorismatase family	IPR000868	2	1	1	1	0	1	1	1	1	1	1	1	1	1	1	1	2	1	1	20
OG0001145	Septin	IPR030379	2	1	1	1	1	1	1	1	1	1	1	1	1	1	1	1	1	1	1	20
OG0001146	TPR/MLP1/MLP2-like protein	IPR012929	2	1	1	1	1	1	1	1	1	1	1	1	1	1	1	1	1	1	1	20
OG0001147	Ubiquitin fusion degradation protein UFD1	IPR004854	2	1	1	1	1	1	1	1	1	1	1	1	1	1	1	1	1	1	1	20
OG0001148	Cysteine-rich secretory protein family	IPR014044	2	1	1	1	1	1	1	1	1	1	1	1	1	1	1	1	1	1	1	20
OG0001149	Pyridine nucleotide-disulphide oxidoreductase	IPR023753	3	0	0	1	2	1	1	1	1	1	1	2	1	0	1	2	1	1	0	20
OG0001150	pfkB family carbohydrate kinase	IPR011611	2	1	0	1	2	1	1	1	1	1	1	1	1	1	1	1	1	1	1	20
OG0001151	Helix-loop-helix DNA-binding domain	IPR011598	1	1	1	1	1	2	1	1	1	1	1	1	1	1	1	1	1	1	1	20
OG0001152	Glutathione-dependent formaldehyde-activating enzyme	IPR006913	1	1	1	1	2	1	1	1	1	1	1	1	1	1	1	1	1	1	1	20
OG0001153	Thiamine pyrophosphate enzyme, C-terminal TPP binding domain	IPR011766	1	1	1	1	2	1	1	1	1	1	1	1	1	1	1	1	1	1	1	20
OG0001154	Glycerophosphoryl diester phosphodiesterase family	IPR030395	3	1	1	1	1	1	1	1	1	1	1	1	1	1	1	1	1	1	0	20
OG0001155	Glycosyl transferase family group 2	IPR001173	1	1	1	1	1	2	1	1	1	1	1	1	1	1	1	1	1	1	1	20
OG0001156	Cytochrome c oxidase assembly protein CtaG/Cox11	IPR007533	1	1	1	1	1	2	1	1	1	1	1	1	1	1	1	1	1	1	1	20
OG0001157	Ribosomal protein L16p/L10e	IPR016180	2	1	1	1	1	1	1	1	1	1	1	1	1	1	1	1	1	1	1	20
OG0001158	Hepatocellular carcinoma-associated antigen 59	IPR010756	2	1	1	1	1	1	1	1	1	1	1	1	1	1	1	1	1	1	1	20
OG0001159	Protein kinase domain	IPR000719	1	1	1	1	2	1	1	1	1	1	1	1	1	1	1	1	1	1	1	20
OG0001160	Fungal protein of unknown function (DUF1752)	IPR013860	1	1	1	1	2	1	1	1	1	1	1	1	1	1	1	1	1	1	1	20
OG0001161	Cytochrome oxidase assembly protein	IPR003780	2	1	1	1	1	1	1	1	1	1	1	1	1	1	1	1	1	1	1	20
OG0001162	MutS domain II	IPR007860	2	1	1	1	1	1	1	1	1	1	1	1	1	1	1	1	1	1	1	20
OG0001163	Helix-hairpin-helix motif	IPR000445	1	1	1	1	1	2	1	1	1	1	1	1	1	1	1	1	1	1	1	20
OG0001164	Urb2/Npa2 family	IPR018849	1	1	1	1	1	2	1	1	1	1	1	1	1	1	1	1	1	1	1	20
OG0001165	Major Facilitator Superfamily	IPR011701	2	1	1	1	1	1	1	1	1	1	1	1	1	1	1	1	1	1	1	20
OG0001166	Fungal specific transcription factor domain	IPR007219	1	1	1	1	1	1	1	1	1	1	1	1	1	1	1	1	2	1	1	20
OG0001167	Histidine phosphatase superfamily (branch 1)	IPR013078	1	1	1	1	1	2	1	1	1	1	1	1	1	1	1	1	1	1	1	20
OG0001168	DnaJ domain	IPR001623	1	1	1	1	1	2	1	1	1	1	1	1	1	1	1	1	1	1	1	20
OG0001169	C2 domain	IPR000008	1	1	1	1	1	2	1	1	1	1	1	1	1	1	1	1	1	1	1	20
OG0001170	Bacterial transferase hexapeptide (six repeats)	IPR001451	1	1	1	1	1	2	1	1	1	1	1	1	1	1	1	1	1	1	1	20
OG0001171	Flavin containing amine oxidoreductase	IPR002937	1	1	1	1	1	2	1	1	1	1	1	1	1	1	1	1	1	1	1	20
OG0001172	PAP2 superfamily	IPR000326	2	1	1	1	1	1	1	1	1	1	1	1	1	1	1	1	1	1	1	20
OG0001173	Kinetochore complex Fta4 of Sim4 subunit, or CENP-50	IPR025207	1	1	1	1	2	1	1	1	1	1	1	1	1	1	1	1	1	1	1	20
OG0001174	Late endosomal/lysosomal adaptor and MAPK and MTOR activator	IPR028209	1	1	1	1	1	1	1	1	1	1	1	1	1	1	1	1	1	1	2	20
OG0001175	UreD urease accessory protein	IPR002669	1	1	1	1	1	1	1	1	1	1	2	1	1	1	1	1	1	1	1	20
OG0001176	TFIIIC subunit	IPR019481	1	1	1	1	1	1	1	1	1	1	1	1	1	1	1	1	2	1	1	20
OG0001177	Ribosomal protein S19	IPR002222	2	1	1	1	1	1	1	1	1	1	1	1	1	1	1	1	1	1	1	20
OG0001178	Adenylate cyclase associated (CAP) C terminal	IPR013912	1	0	1	1	3	1	1	1	1	1	1	1	1	1	1	1	1	1	1	20
OG0001179	Fungal specific transcription factor domain	IPR007219	2	1	1	1	1	1	1	1	1	1	1	1	1	1	1	1	1	1	1	20
OG0001180	Arrestin (or S-antigen), C-terminal domain	IPR011022	1	1	1	1	1	2	1	1	1	1	1	1	1	1	1	1	1	1	1	20
OG0001181	SH3 domain	IPR001452	1	1	1	1	1	2	1	1	1	1	1	1	1	1	1	1	1	1	1	20
OG0001182	Bacterial transferase hexapeptide (six repeats)	IPR001451	1	1	1	1	2	1	1	1	1	1	1	1	1	1	1	1	1	1	1	20
OG0001183	Ribosomal L18 C-terminal region	IPR025607	1	1	1	1	2	1	1	1	1	1	1	1	1	1	1	1	1	1	1	20
OG0001184	Amidohydrolase family	IPR006680	2	1	1	1	1	1	1	1	1	1	1	1	1	1	1	1	1	1	1	20
OG0001185	60S ribosome biogenesis protein Rrp14	IPR029188	1	1	1	1	2	1	1	1	1	1	1	1	1	1	1	1	1	1	1	20
OG0001186	Alcohol dehydrogenase GroES-like domain	IPR013154	2	1	1	1	1	1	1	1	1	1	1	1	1	1	1	1	1	1	1	20
OG0001187	MutS domain I	IPR007695	2	1	1	1	1	1	1	1	1	1	1	1	1	1	1	1	1	1	1	20
OG0001188	Adenylate and Guanylate cyclase catalytic domain	IPR001054	2	1	1	1	1	1	1	1	1	1	1	1	1	1	1	1	1	1	1	20
OG0001189	BTB/POZ domain	IPR000210	1	1	1	1	2	1	1	1	1	1	1	1	1	1	1	1	1	1	1	20
OG0001190	Adenylate kinase		1	1	1	1	2	1	1	1	1	1	1	1	1	1	1	1	1	1	1	20
OG0001191	Exocyst complex component Sec3	IPR019160	1	1	1	1	2	1	1	1	1	1	1	1	1	1	1	1	1	1	1	20
OG0001192	RNA recognition motif. (a.k.a. RRM, RBD, or RNP domain)	IPR000504	2	1	1	1	1	1	1	1	1	1	1	1	1	1	1	1	1	1	1	20
OG0001193	Aminotransferase class I and II	IPR004839	1	1	1	1	1	1	1	1	1	1	1	1	1	1	1	1	1	1	2	20
OG0001194	Fungal specific transcription factor domain	IPR021858	1	1	1	1	1	1	1	1	1	1	1	1	1	2	1	1	1	1	1	20
OG0001195	bZIP transcription factor	IPR004827	2	1	1	1	1	1	1	1	1	1	1	1	1	1	1	1	1	1	1	20
OG0001196	Glycosyl hydrolase family 63 C-terminal domain	IPR031335	1	1	1	1	1	2	1	1	1	1	1	1	1	1	1	1	1	1	1	20
OG0001197	AKAP7 2'5' RNA ligase-like domain	IPR019510	1	1	1	1	1	2	1	1	1	1	1	1	1	1	1	1	1	1	1	20
OG0001198	PSP1 C-terminal conserved region	IPR007557	2	1	1	1	1	1	1	1	1	1	1	1	1	1	1	1	1	1	1	20
OG0001199	hypothetical protein PV08_01478	IPR010666	1	1	1	1	1	2	1	1	1	1	1	1	1	1	1	1	1	1	1	20
OG0001200	Ras family	IPR001806	2	1	1	1	1	1	1	1	1	1	1	1	1	1	1	1	1	1	1	20
OG0001201	Haloacid dehalogenase-like hydrolase	IPR023214	1	1	1	1	1	2	1	1	1	1	1	1	1	1	1	1	1	1	1	20
OG0001202	Tubulin binding cofactor A	IPR004226	1	1	1	1	2	1	1	1	1	1	1	1	1	1	1	1	1	1	1	20
OG0001203	Protein kinase domain	IPR000719	1	1	1	1	2	1	1	1	1	1	1	1	1	1	1	1	1	1	1	20
OG0001204	Endoplasmic reticulum vesicle transporter	IPR012936	2	1	1	1	1	1	1	1	1	1	1	1	1	1	1	1	1	1	1	20
OG0001205	short chain dehydrogenase	IPR002347	2	1	1	1	1	1	1	1	1	1	1	1	1	1	1	1	1	1	1	20
OG0001206	Integral membrane protein DUF92	IPR002794	2	1	1	1	1	1	1	1	1	1	1	1	1	1	1	1	1	1	1	20
OG0001207	TAFII55 protein conserved region	IPR006751	1	1	1	1	1	2	1	1	1	1	1	1	1	1	1	1	1	1	1	20
OG0001208	Ring finger domain	IPR001841	1	1	1	1	2	1	1	1	1	1	1	1	1	1	1	1	1	1	1	20
OG0001209	Protein kinase domain	IPR000719	1	1	2	1	1	1	1	1	1	1	1	1	1	1	1	1	1	1	1	20
OG0001210	Calcineurin-like phosphoesterase	IPR004843	1	1	1	1	1	2	1	1	1	1	1	1	1	1	1	1	1	1	1	20
OG0001211	Phospholipase D Active site motif	IPR001736	1	1	1	1	1	2	1	1	1	1	1	1	1	1	1	1	1	1	1	20
OG0001212	FAD binding domain	IPR002938	1	1	1	1	1	2	1	1	1	1	1	1	1	1	1	1	1	1	1	20
OG0001213	Pirin	IPR003829	1	1	1	1	2	1	1	1	1	1	1	1	1	1	1	1	1	1	1	20
OG0001214	CENP-Q, a CENPA-CAD centromere complex subunit	IPR025212	1	1	1	1	1	1	1	1	1	1	1	1	2	1	1	1	1	1	1	20
OG0001215	Transmembrane amino acid transporter protein	IPR013057	1	1	1	1	2	1	1	1	1	1	1	1	1	1	1	1	1	1	1	20
OG0001216	GRIP domain	IPR000237	2	1	1	1	1	1	1	1	1	1	1	1	1	1	1	1	1	1	1	20
OG0001217	HECT-like Ubiquitin-conjugating enzyme (E2)-binding	IPR019193	1	1	1	1	1	1	1	1	1	1	1	1	1	1	1	1	1	2	1	20
OG0001218	PX domain	IPR001683	1	1	1	1	2	1	1	1	1	1	1	1	1	1	1	1	1	1	1	20
OG0001219	Domain of unknwon function (DUF3824)	IPR024436	2	1	1	1	1	1	1	1	1	1	1	1	1	1	1	1	1	1	1	20
OG0001220	Lipase (class 3)	IPR002921	1	1	1	1	1	2	1	1	1	1	1	1	1	1	1	1	1	1	1	20
OG0001221	Putative esterase	IPR000801	1	1	1	1	2	1	1	1	1	1	1	1	1	1	1	1	1	1	1	20
OG0001222	RNA recognition motif. (a.k.a. RRM, RBD, or RNP domain)	IPR000504	1	1	1	1	1	1	1	1	1	1	1	1	1	1	1	2	1	1	1	20
OG0001223	ABC transporter	IPR003439	1	1	1	1	1	2	1	1	1	1	1	1	1	1	1	1	1	1	1	20
OG0001224	Ankyrin repeats (3 copies)	IPR020683	1	1	1	1	1	2	1	1	1	1	1	1	1	1	1	1	1	1	1	20
OG0001225	Leucine rich repeat	IPR001611	2	1	1	1	1	1	1	1	1	1	1	1	1	1	1	1	1	1	1	20
OG0001226	Basic region leucine zipper	IPR004827	2	1	1	1	2	1	1	1	1	1	1	1	1	1	1	1	0	1	1	20
OG0001227	DASH complex subunit Dad3	IPR013965	1	1	1	1	1	2	1	1	1	1	1	1	1	1	1	1	1	1	1	20
OG0001228	Adenosine/AMP deaminase	IPR001365	2	1	1	1	1	1	1	1	1	1	1	1	1	1	1	1	1	1	1	20
OG0001229	Helicase conserved C-terminal domain	IPR001650	1	0	1	0	1	2	1	1	1	1	1	1	1	1	1	1	3	1	1	20
OG0001230	ABC transporter	IPR003439	1	1	1	1	1	1	1	1	1	1	1	1	1	1	1	1	1	1	2	20
OG0001231	ADP-ribosylation factor family	IPR006689	2	1	1	1	1	1	1	1	1	1	1	1	1	1	1	1	1	1	1	20
OG0001232	Fibronectin type III-like domain	IPR026891	2	1	1	1	1	1	1	1	1	1	1	1	1	1	1	1	2	1	0	20
OG0001233	Clathrin adaptor complex small chain	IPR022775	2	1	1	1	1	1	1	1	1	1	1	1	1	1	1	1	1	1	1	20
OG0001234	Domain of unknown function (DUF3384)	IPR024584	3	1	1	1	1	1	1	1	1	1	1	1	1	1	1	1	1	1	0	20
OG0001235	Translation machinery associated TMA7	IPR015157	1	1	1	2	1	1	1	1	1	1	1	1	1	1	1	1	1	1	1	20
OG0001236	Class II Aldolase and Adducin N-terminal domain	IPR001303	2	1	1	1	1	1	1	1	1	1	1	1	1	1	1	1	1	1	1	20
OG0001237	ATP adenylyltransferase	IPR019200	2	1	1	1	1	1	1	1	1	1	1	1	1	1	1	1	1	1	1	20
OG0001238			1	1	1	1	1	2	1	1	1	1	1	1	1	1	1	1	1	1	1	20
OG0001239	Chitin synthesis regulation, resistance to Congo red	IPR020999	1	1	1	1	1	2	1	1	1	1	1	1	1	1	1	1	1	1	1	20
OG0001240	Translin family	IPR002848	1	1	1	1	1	2	1	1	1	1	1	1	1	1	1	1	1	1	1	20
OG0001241			1	1	1	1	1	1	1	1	1	1	1	1	1	1	1	1	1	1	2	20
OG0001242	short chain dehydrogenase	IPR002347	1	1	1	1	2	1	1	1	1	1	1	1	1	1	1	1	1	1	1	20
OG0001243	Flavin containing amine oxidoreductase	IPR002937	1	1	1	1	1	2	1	1	1	1	1	1	1	1	1	1	1	1	1	20
OG0001244	Fungal specific transcription factor domain	IPR007219	1	1	1	1	2	1	1	1	1	1	1	1	1	1	1	1	1	1	1	20
OG0001245	Phosphoribosyl transferase domain	IPR000836	1	1	1	1	1	2	1	1	1	1	1	1	1	1	1	1	1	1	1	20
OG0001246	Calponin homology (CH) domain	IPR001715	1	1	1	1	2	1	1	1	1	1	1	1	1	1	1	1	1	1	1	20
OG0001247	Major Facilitator Superfamily	IPR011701	2	1	1	1	1	1	1	1	1	1	1	1	1	1	1	1	1	1	1	20
OG0001248	Protein kinase domain	IPR000719	2	1	1	1	1	1	1	1	1	1	1	1	1	1	1	1	1	1	1	20
OG0001249	TIM21	IPR013261	1	1	1	1	2	1	1	1	1	1	1	1	1	1	1	1	1	1	1	20
OG0001250	Carboxyl transferase domain	IPR000022	1	1	1	1	1	1	1	1	1	1	1	1	1	1	1	1	2	1	1	20
OG0001251	alpha/beta hydrolase fold	IPR000073	2	1	0	1	2	1	1	1	1	1	1	1	1	1	1	1	1	1	1	20
OG0001252	Origin recognition complex (ORC) subunit 3 N-terminus	IPR020795	1	1	1	1	1	2	1	1	1	1	1	1	1	1	1	1	1	1	1	20
OG0001253	Major Facilitator Superfamily	IPR011701	1	1	1	1	1	1	1	1	1	2	1	1	1	1	1	1	1	1	1	20
OG0001254	ADP-ribosylation factor family	IPR006689	1	1	1	1	2	1	1	1	1	1	1	1	1	1	1	1	1	1	1	20
OG0001255	FAD dependent oxidoreductase	IPR006076	1	1	1	1	2	1	1	1	1	1	1	1	1	1	1	1	1	1	1	20
OG0001256	Aldehyde dehydrogenase family	IPR015590	1	1	1	1	2	1	1	1	1	1	1	1	1	1	1	1	1	1	1	20
OG0001257	Cofilin/tropomyosin-type actin-binding protein	IPR002108	1	1	1	1	2	1	1	1	1	1	1	1	1	1	1	1	1	1	1	20
OG0001258	Sodium:solute symporter family	IPR001734	2	1	1	1	1	1	1	1	1	1	1	1	1	1	1	1	1	1	1	20
OG0001259	DASH complex subunit Duo1	IPR013960	1	1	1	1	2	1	1	1	1	1	1	1	1	1	1	1	1	1	1	20
OG0001260	Dihydrodipicolinate synthetase family	IPR002220	2	1	1	1	1	1	1	1	1	1	1	1	1	1	1	1	1	1	1	20
OG0001261	AMP-binding enzyme	IPR000873	1	1	1	1	1	1	1	1	1	1	1	1	1	1	1	1	1	1	2	20
OG0001262	AAA ATPase domain		2	1	1	1	1	1	1	1	1	1	1	1	1	1	1	1	1	1	1	20
OG0001263	PH domain	IPR001849	2	1	1	1	1	1	1	1	1	1	1	1	1	1	1	1	1	1	1	20
OG0001264	CUE domain	IPR003892	2	1	1	1	1	1	1	1	1	1	1	1	1	1	1	1	1	1	1	20
OG0001265	DNA polymerase family B	IPR006134	2	1	1	1	1	1	1	1	1	1	1	1	1	1	1	1	1	1	1	20
OG0001266	Anaphase-promoting complex subunit 11 RING-H2 finger	IPR024991	1	1	1	1	1	1	1	1	1	1	1	1	1	1	1	1	1	1	2	20
OG0001267	His Kinase A (phospho-acceptor) domain	IPR003661	1	1	1	1	2	1	1	1	1	1	1	1	1	1	1	1	1	1	1	20
OG0001268	Anticodon-binding domain of tRNA	IPR013155	1	1	1	1	2	1	1	1	1	1	1	1	1	1	1	1	1	1	1	20
OG0001269	ATP synthase alpha/beta chain, C terminal domain	IPR000793	2	1	1	1	1	1	1	1	1	1	1	1	1	1	1	1	1	1	1	20
OG0001270	Tubulin binding cofactor A	IPR004226	1	1	1	1	1	2	1	1	1	1	1	1	1	1	1	1	1	1	1	20
OG0001271	Ras family	IPR001806	1	1	1	1	1	2	1	1	1	1	1	1	1	1	1	1	1	1	1	20
OG0001272	Domain of unknown function (DUF1857)	IPR015075	1	1	1	1	2	1	1	1	1	1	1	1	1	1	1	1	1	1	1	20
OG0001273	Adaptin C-terminal domain	IPR008152	1	1	1	1	1	1	1	1	1	1	1	1	1	1	1	1	2	1	1	20
OG0001274	Cytidine and deoxycytidylate deaminase zinc-binding region	IPR002125	1	1	1	1	1	2	1	1	1	1	1	1	1	1	1	1	1	1	1	20
OG0001275	Iron/manganese superoxide dismutases, C-terminal domain	IPR019832	2	1	1	1	1	1	1	1	1	1	1	1	1	1	1	1	1	1	1	20
OG0001276	Fungal specific transcription factor domain	IPR007219	2	1	1	1	1	1	1	1	1	1	1	1	1	1	1	1	1	1	1	20
OG0001277	Tyrosine phosphatase family	IPR026893	1	1	1	1	1	1	1	1	1	1	1	1	1	1	1	1	1	1	2	20
OG0001278	Cytoskeletal-regulatory complex EF hand	IPR000261	2	1	1	1	1	1	1	1	1	1	1	1	1	1	1	1	1	1	1	20
OG0001279	Ubiquinol-cytochrome C reductase, UQCRX/QCR9 like	IPR008027	1	1	1	1	2	1	1	1	1	1	1	1	1	1	1	1	1	1	1	20
OG0001280	Glycosyl hydrolases family 16	IPR000757	1	1	1	1	2	1	1	1	1	1	1	1	1	1	1	1	1	1	1	20
OG0001281	Alg9-like mannosyltransferase family	IPR005599	1	1	1	1	1	2	1	1	1	1	1	1	1	1	1	1	1	1	1	20
OG0001282	Alpha/beta hydrolase family	IPR000073	1	1	1	1	1	2	1	1	1	1	1	1	1	1	1	1	1	1	1	20
OG0001283	Mitotic checkpoint protein	IPR008672	1	1	1	1	2	1	1	1	1	1	1	1	1	1	1	1	1	1	1	20
OG0001284	Carboxymuconolactone decarboxylase family	IPR003779	2	1	1	1	1	1	1	1	1	1	1	1	1	1	1	1	1	1	1	20
OG0001285	Glycosyltransferase family 25 (LPS biosynthesis protein)	IPR002654	2	1	1	1	1	1	1	1	1	1	1	1	1	1	1	1	1	1	1	20
OG0001286	Mechanosensitive ion channel	IPR006685	1	1	1	1	1	2	1	1	1	1	1	1	1	1	1	1	1	1	1	20
OG0001287	Actin	IPR004000	1	1	1	1	1	2	1	1	1	1	1	1	1	1	1	1	1	1	1	20
OG0001288	Surfeit locus protein 5 subunit 22 of Mediator complex	IPR009332	1	1	1	1	1	1	1	1	1	1	1	1	1	1	1	1	2	1	1	20
OG0001289	Dihydrofolate reductase	IPR001796	2	1	1	1	1	1	1	1	1	1	1	1	1	1	1	1	1	1	1	20
OG0001290	Fungal specific transcription factor domain	IPR007219	2	1	1	1	1	1	1	1	1	1	1	1	1	1	1	1	1	1	1	20
OG0001291	Bacterial NAD-glutamate dehydrogenase	IPR028971	1	1	1	1	1	1	1	1	1	1	1	1	1	1	2	1	1	1	1	20
OG0001292	Berberine and berberine like	IPR012951	1	1	1	1	1	1	1	1	1	1	1	1	1	1	1	2	1	1	1	20
OG0001293	Alpha/beta hydrolase family	IPR000073	2	1	1	1	1	1	1	1	1	1	1	1	1	1	1	1	1	1	1	20
OG0001294	Chromatin modification-related protein EAF7	IPR012423	2	1	1	1	1	1	1	1	1	1	1	1	1	1	1	1	1	1	1	20
OG0001295	Amino acid permease	IPR002293	1	1	1	1	2	2	1	1	1	1	1	1	1	1	1	1	1	1	0	20
OG0001296	CoA-transferase family III	IPR003673	1	1	1	1	1	2	1	1	1	1	1	1	1	1	1	1	1	1	1	20
OG0001297	C2 domain	IPR000008	2	1	1	1	1	1	1	1	1	1	1	1	1	1	1	1	1	1	1	20
OG0001298	Anticodon-binding domain of tRNA	IPR013155	1	1	1	1	2	1	1	1	1	1	1	1	1	1	1	1	1	1	1	20
OG0001299	50S ribosome-binding GTPase	IPR006073	1	1	1	1	1	2	1	1	1	1	1	1	1	1	1	1	1	1	1	20
OG0001300	ATPase family associated with various cellular activities (AAA)	IPR003959	1	1	1	1	1	1	1	1	1	1	1	2	1	1	1	1	1	1	1	20
OG0001301	Mo25-like	IPR013878	1	1	1	1	2	1	1	1	1	1	1	1	1	1	1	1	1	1	1	20
OG0001302	Major Facilitator Superfamily	IPR011701	1	1	1	1	1	1	1	1	1	2	1	1	1	1	1	1	1	1	1	20
OG0001303	Ammonium Transporter Family	IPR024041	1	1	1	1	1	2	1	1	1	1	1	1	1	1	1	1	1	1	1	20
OG0001304	Enoyl-(Acyl carrier protein) reductase		2	1	1	1	1	1	1	1	1	1	1	1	1	1	1	1	1	1	1	20
OG0001305	Fungal specific transcription factor domain	IPR007219	2	1	1	1	1	1	1	1	1	1	1	1	1	1	1	1	1	1	1	20
OG0001306	HECT-domain (ubiquitin-transferase)	IPR000569	1	1	1	1	2	1	1	1	1	1	1	1	1	1	1	1	1	1	1	20
OG0001307	ubiE/COQ5 methyltransferase family	IPR004033	1	1	1	1	1	2	1	1	1	1	1	1	1	1	1	1	1	1	1	20
OG0001308	Dehydrogenase E1 component	IPR001017	1	1	1	1	1	2	1	1	1	1	1	1	1	1	1	1	1	1	1	20
OG0001309	AN1-like Zinc finger	IPR000058	1	1	1	1	2	1	1	1	1	1	1	1	1	1	1	1	1	1	1	20
OG0001310	Aminotransferase class-V	IPR000192	2	1	1	1	1	1	1	1	1	1	1	1	1	1	1	1	1	1	1	20
OG0001311	Major Facilitator Superfamily	IPR011701	2	1	1	1	1	1	1	1	1	1	1	1	1	1	1	1	1	1	1	20
OG0001312	Clathrin adaptor complex small chain	IPR022775	2	1	1	1	1	1	1	1	1	1	1	1	1	1	1	1	1	1	1	20
OG0001313	Domain of unknown function (DUF4267)	IPR025363	2	1	0	1	2	1	1	1	1	1	1	1	1	1	1	1	1	1	1	20
OG0001314	Enoyl-(Acyl carrier protein) reductase		1	1	1	1	1	2	1	1	1	1	1	1	1	1	1	1	1	1	1	20
OG0001315	Methyltransferase domain		1	1	1	1	2	1	1	1	1	1	1	1	1	1	1	1	1	1	1	20
OG0001316	Ankyrin repeats (3 copies)	IPR020683	1	1	1	1	2	1	1	1	1	1	1	1	1	1	1	1	1	1	1	20
OG0001317	CFEM domain	IPR008427	2	1	1	1	1	1	1	1	1	1	1	1	1	1	1	1	1	1	1	20
OG0001318	Poly(ADP-ribose) polymerase and DNA-Ligase Zn-finger region	IPR001510	1	1	1	1	2	1	1	1	1	1	1	1	1	1	1	1	1	1	1	20
OG0001319	JmjC domain, hydroxylase	IPR003347	2	1	1	1	1	1	1	1	1	1	1	1	1	1	1	1	1	1	1	20
OG0001320	1,3-beta-glucan synthase component	IPR003440	2	1	1	1	1	1	1	1	1	1	1	1	1	1	1	1	1	1	1	20
OG0001321	DHH family	IPR001667	1	1	1	1	1	1	1	1	1	1	1	1	1	1	1	1	2	1	1	20
OG0001322	Protein of unknown function (DUF3712)	IPR022185	1	2	1	1	1	1	1	1	1	1	1	1	1	1	1	1	1	1	1	20
OG0001323	Class II Aldolase and Adducin N-terminal domain	IPR001303	2	1	0	1	1	1	1	1	1	1	1	1	1	1	1	1	1	1	2	20
OG0001324	C6 transcription factor	IPR001138|IPR021858|IPR036864	8	1	1	1	1	0	0	0	0	0	0	1	1	1	1	1	0	1	2	20
OG0001325	DEAD/DEAH box helicase	IPR011545	1	1	1	1	1	1	1	1	1	2	1	1	1	1	1	1	1	1	1	20
OG0001326	Domain of unknown function (DUF3535)	IPR022707	2	1	1	1	1	1	1	1	1	1	1	1	1	1	1	1	1	1	1	20
OG0001327	RNA recognition motif. (a.k.a. RRM, RBD, or RNP domain)	IPR000504	1	1	1	1	2	1	1	1	1	1	1	1	1	1	1	1	1	1	1	20
OG0001328	Adenylosuccinate synthetase	IPR001114	1	1	1	1	2	1	1	1	1	1	1	1	1	1	1	1	1	1	1	20
OG0001329	Calcineurin-like phosphoesterase	IPR004843	2	1	1	1	1	1	1	1	1	1	1	1	1	1	1	1	1	1	1	20
OG0001330	Fungal specific transcription factor domain	IPR007219	1	1	1	1	1	1	1	1	1	1	1	1	1	1	1	1	1	1	2	20
OG0001331	Alpha-L-arabinofuranosidase C-terminal domain	IPR010720	1	1	1	1	1	1	1	1	1	1	1	1	2	1	1	1	1	1	1	20
OG0001332	LMBR1-like membrane protein	IPR006876	2	1	1	1	1	1	1	1	1	1	1	1	1	1	1	1	1	1	1	20
OG0001333	Bacterial transferase hexapeptide (six repeats)	IPR001451	1	1	1	1	1	2	1	1	1	1	1	1	1	1	1	1	1	1	1	20
OG0001334	Nicotinate phosphoribosyltransferase (NAPRTase) family	IPR007229	2	1	1	1	1	1	1	1	1	1	1	1	1	1	1	1	1	1	1	20
OG0001335	short chain dehydrogenase	IPR002347	1	1	1	1	1	1	1	1	1	1	1	1	1	1	1	1	1	1	2	20
OG0001336	Glutamine amidotransferase class-I	IPR017926	1	1	1	1	1	2	1	1	1	1	1	1	1	1	1	1	1	1	1	20
OG0001337	PX domain	IPR001683	1	1	1	1	1	2	1	1	1	1	1	1	1	1	1	1	1	1	1	20
OG0001338	Thioesterase superfamily	IPR006683	1	1	1	1	1	2	1	1	1	1	1	1	1	1	1	1	1	1	1	20
OG0001339	His Kinase A (phospho-acceptor) domain	IPR003661	1	1	1	1	1	2	1	1	1	1	1	1	1	1	1	1	1	1	1	20
OG0001340	Aminotransferase class I and II	IPR004839	1	1	1	1	2	1	1	1	1	1	1	1	1	1	1	1	1	1	1	20
OG0001341	amidohydrolase family protein	IPR006680|IPR013087|IPR022698|IPR032465|IPR032466	2	1	2	1	0	0	0	0	0	0	0	2	2	2	2	3	0	2	1	20
OG0001342	Amino acid permease	IPR002293	1	1	1	1	2	1	1	1	1	1	1	1	1	1	1	1	1	1	1	20
OG0001343	alpha/beta hydrolase fold	IPR000073	1	1	1	1	1	1	1	1	1	1	1	1	1	1	1	1	1	1	2	20
OG0001344	Adenylate and Guanylate cyclase catalytic domain	IPR001054	2	1	1	1	1	1	1	1	1	1	1	1	1	1	1	1	1	1	1	20
OG0001345	Chromo (CHRromatin Organisation MOdifier) domain	IPR023780	1	1	1	1	2	1	1	1	1	1	1	1	1	1	1	1	1	1	1	20
OG0001346	GAT domain	IPR004152	1	1	1	1	2	1	1	1	1	1	1	1	1	1	1	1	1	1	1	20
OG0001347	Domain of unknown function (DUF3449)	IPR024598	2	2	1	1	1	1	1	1	1	1	1	1	0	2	0	1	1	1	1	20
OG0001348	Homeobox KN domain	IPR008422	1	1	1	1	1	1	1	1	1	1	1	1	1	1	1	1	2	1	1	20
OG0001349	GPI biosynthesis protein family Pig-F	IPR009580	1	1	1	1	1	1	1	1	1	1	2	1	1	1	1	1	1	1	1	20
OG0001350	Indigoidine synthase A like protein	IPR007342	1	1	1	1	2	1	1	1	1	1	1	1	1	1	1	1	1	1	1	20
OG0001351	Fungal specific transcription factor domain	IPR007219	2	1	1	1	1	1	1	1	1	1	1	1	1	1	1	1	1	1	1	20
OG0001352	CS domain	IPR007052	1	1	1	1	2	1	1	1	1	1	1	1	1	1	1	1	1	1	1	20
OG0001353	Snf7	IPR005024	1	1	1	1	2	1	1	1	1	1	1	1	1	1	1	1	1	1	1	20
OG0001354	Major Facilitator Superfamily	IPR011701	1	1	1	1	2	1	1	1	1	1	1	1	1	1	1	1	1	1	1	20
OG0001355	Pyridoxal-dependent decarboxylase conserved domain	IPR002129	1	1	1	1	1	2	1	1	1	1	1	1	1	1	1	1	1	1	1	20
OG0001356	Domain of unknown function (DUF1992)	IPR018961	1	1	1	1	2	1	1	1	1	1	1	1	1	1	1	1	1	1	1	20
OG0001357	MBOAT, membrane-bound O-acyltransferase family	IPR004299	1	1	1	1	2	1	1	1	1	1	1	1	1	1	1	1	1	1	1	20
OG0001358	Acyl-CoA dehydrogenase, C-terminal domain	IPR009075	2	1	1	1	1	1	1	1	1	1	1	1	1	1	1	1	1	1	1	20
OG0001359	Exocyst component 84 C-terminal	IPR032403	1	1	1	1	1	2	1	1	1	1	1	1	1	1	1	1	1	1	1	20
OG0001360	DHHC palmitoyltransferase	IPR001594	1	1	1	1	2	1	1	1	1	1	1	1	1	1	1	1	1	1	1	20
OG0001361	Major Facilitator Superfamily	IPR011701	2	1	1	1	1	1	1	0	1	1	1	1	1	1	1	1	1	1	2	20
OG0001362	Aldehyde dehydrogenase family	IPR015590	2	1	1	1	1	1	1	1	1	1	1	1	1	1	1	1	1	1	1	20
OG0001363	Copper amine oxidase, enzyme domain	IPR015798	2	1	1	1	1	1	1	1	1	1	1	1	1	1	1	1	1	1	1	20
OG0001364	F-box-like	IPR001810	1	1	1	1	1	1	1	1	1	1	1	1	1	1	1	1	2	1	1	20
OG0001365	Enoyl-(Acyl carrier protein) reductase		1	1	1	1	2	1	1	1	1	1	1	1	1	1	1	1	1	1	1	20
OG0001366	2OG-Fe(II) oxygenase superfamily	IPR027450	1	1	1	1	2	1	1	1	1	1	1	1	1	1	1	1	1	1	1	20
OG0001367	Heterokaryon incompatibility protein (HET)	IPR010730	2	1	1	1	1	1	1	1	1	1	1	1	1	1	1	1	1	1	1	20
OG0001368	Mitochondrial K+-H+ exchange-related	IPR018786	2	1	1	1	1	1	1	1	1	1	1	1	1	1	1	1	1	1	1	20
OG0001369	Reactive mitochondrial oxygen species modulator 1	IPR018450	1	1	1	1	1	2	1	1	1	1	1	1	1	1	1	1	1	1	1	20
OG0001370	alpha/beta hydrolase fold	IPR013094	2	1	1	1	1	1	1	1	1	1	1	1	1	1	1	1	1	1	1	20
OG0001371	HPP family	IPR007065	1	1	1	1	1	1	1	1	1	1	2	1	1	1	1	1	1	1	1	20
OG0001372	Activator of mitotic machinery Cdc14 phosphatase activation C-term	IPR013941	1	1	1	1	2	1	1	1	1	1	1	1	1	1	1	1	1	1	1	20
OG0001373	NAD dependent epimerase/dehydratase family	IPR001509	2	1	1	1	1	1	1	1	1	1	1	1	1	1	1	1	1	1	1	20
OG0001374	Quinolinate phosphoribosyl transferase, C-terminal domain	IPR002638	2	1	1	1	1	1	1	1	1	1	1	1	1	1	1	1	1	1	1	20
OG0001375	Histone deacetylase domain	IPR023801	2	1	1	1	1	2	1	1	1	1	1	1	1	1	1	1	1	1	0	20
OG0001376	Ketopantoate hydroxymethyltransferase	IPR003700	1	1	1	1	1	2	1	1	1	1	1	1	1	1	1	1	1	1	1	20
OG0001377	Elongation factor Tu C-terminal domain	IPR004160	1	1	1	1	1	1	1	1	1	1	1	1	1	1	1	1	1	1	2	20
OG0001378	C2 domain	IPR000008	1	1	1	1	2	1	1	1	1	1	1	1	1	1	1	1	1	1	1	20
OG0001379	Amidohydrolase family	IPR006680	4	1	0	0	0	1	1	0	1	1	1	1	1	1	1	2	1	1	2	20
OG0001380	Methyltransferase domain		2	1	1	1	1	1	1	1	1	1	1	1	1	1	1	1	1	1	1	20
OG0001381	NAD binding domain of 6-phosphogluconate dehydrogenase	IPR006115	3	1	1	1	1	1	1	1	1	1	0	1	1	1	1	1	1	1	1	20
OG0001382	Anthranilate synthase component I, N terminal region	IPR006805	2	1	1	1	1	1	1	1	1	1	1	1	1	1	1	1	1	1	1	20
OG0001383	Aminotransferase class-V	IPR000192	1	1	1	1	1	1	1	1	1	1	1	1	1	1	1	1	1	1	2	20
OG0001384	Exocyst complex subunit Sec15-like	IPR007225	1	1	1	1	2	1	1	1	1	1	1	1	1	1	1	1	1	1	1	20
OG0001385	Mitochondrial ribosomal protein L51 / S25 / CI-B8 domain	IPR007741	1	1	1	1	2	1	1	1	1	1	1	1	1	1	1	1	1	1	1	20
OG0001386	Cyclin	IPR013922	1	1	1	1	1	1	1	1	1	1	1	1	1	1	1	1	2	1	1	20
OG0001387	Histidine phosphatase superfamily (branch 2)	IPR000560	1	1	1	1	1	2	1	1	1	1	1	1	1	1	1	1	1	1	1	20
OG0001388	Chromatin modification-related protein EAF7	IPR012423	1	1	1	1	1	2	1	1	1	1	1	1	1	1	1	1	1	1	1	20
OG0001389	3,4-dihydroxy-2-butanone 4-phosphate synthase	IPR000422	1	1	1	1	1	2	1	1	1	1	1	1	1	1	1	1	1	1	1	20
OG0001390	NADH ubiquinone oxidoreductase subunit NDUFA12	IPR007763	1	1	1	1	1	2	1	1	1	1	1	1	1	1	1	1	1	1	1	20
OG0001391	5'-nucleotidase, C-terminal domain	IPR008334	1	2	1	1	1	1	1	1	1	1	1	1	1	1	1	1	1	1	1	20
OG0001392	Ctr copper transporter family	IPR007274	2	1	1	1	0	1	1	1	1	1	1	1	1	1	1	1	1	1	2	20
OG0001393	Membrane transport protein	IPR004776	1	1	1	1	1	2	1	1	1	1	1	1	1	1	1	1	1	1	1	20
OG0001394	Gpi16 subunit, GPI transamidase component	IPR007245	1	1	1	1	1	1	1	1	1	1	2	1	1	1	1	1	1	1	1	20
OG0001395	Inosine-uridine preferring nucleoside hydrolase	IPR001910	2	1	1	1	1	1	1	1	1	1	1	1	1	1	1	1	1	1	1	20
OG0001396	SUR7/PalI family	IPR009571	1	1	1	1	2	1	1	1	1	1	1	1	1	1	1	1	1	1	1	20
OG0001397	Ubiquitin carboxyl-terminal hydrolase	IPR001394	1	1	1	1	1	2	1	1	1	1	1	1	1	1	1	1	1	1	1	20
OG0001398	HEAT repeats		2	1	1	1	1	1	1	1	1	1	1	1	1	1	1	1	1	1	1	20
OG0001399	Pyridine nucleotide-disulphide oxidoreductase	IPR023753	1	1	1	1	2	1	1	1	1	1	1	1	1	1	1	1	1	1	1	20
OG0001400	Cytidine and deoxycytidylate deaminase zinc-binding region	IPR002125	1	1	1	1	2	1	1	1	1	1	1	1	1	1	1	1	1	1	1	20
OG0001401	Autophagy protein Atg8 ubiquitin like	IPR004241	2	1	1	1	1	1	1	1	1	1	1	1	1	1	1	1	1	1	1	20
OG0001402	Enoyl-(Acyl carrier protein) reductase		2	1	1	1	1	1	1	1	1	1	1	1	1	1	1	1	1	1	1	20
OG0001403	DNA photolyase	IPR006050	1	1	1	1	2	1	1	1	1	1	1	1	1	1	1	1	1	1	1	20
OG0001404	CTP synthase N-terminus	IPR017456	1	1	1	1	2	1	1	1	1	1	1	1	1	1	1	1	1	1	1	20
OG0001405	14-3-3 protein	IPR023410	2	1	1	1	1	1	1	1	1	1	1	1	1	1	1	1	1	1	1	20
OG0001406	Autophagy protein Apg17	IPR007240	2	1	1	1	1	1	1	1	1	1	1	1	1	1	1	1	1	1	1	20
OG0001407	Increased loss of mitochondrial DNA protein 1	IPR018815	1	1	1	1	1	1	1	1	1	1	1	1	1	1	1	2	1	1	1	20
OG0001408	short chain dehydrogenase	IPR002347	1	1	1	1	1	1	1	1	1	1	1	1	1	1	1	1	2	1	1	20
OG0001409	Salt tolerance down-regulator	IPR025279	1	1	1	1	1	2	1	1	1	1	1	1	1	1	1	1	1	1	1	20
OG0001410	Arginase family	IPR006035	1	1	1	1	1	2	1	1	1	1	1	1	1	1	1	1	1	1	1	20
OG0001411	Fungal specific transcription factor domain	IPR021858	1	1	1	1	1	2	1	1	1	1	1	1	1	1	1	1	1	1	1	20
OG0001412	Dual specificity phosphatase, catalytic domain	IPR000340	1	1	1	1	2	1	1	1	1	1	1	1	1	1	1	1	1	1	1	20
OG0001413	Glutaredoxin	IPR002109	1	1	1	1	1	2	1	1	1	1	1	1	1	1	1	1	1	1	1	20
OG0001414	Brix domain	IPR007109	1	1	1	1	2	1	1	1	1	1	1	1	1	1	1	1	1	1	1	20
OG0001415	Cytidine and deoxycytidylate deaminase zinc-binding region	IPR002125	1	1	1	1	1	2	1	1	1	1	1	1	1	1	1	1	1	1	1	20
OG0001416	F-box-like	IPR001810	1	1	1	1	2	1	1	1	1	1	1	1	1	1	1	1	1	1	1	20
OG0001417	50S ribosome-binding GTPase	IPR006073	1	1	1	1	1	2	1	1	1	1	1	1	1	1	1	1	1	1	1	20
OG0001418	Mitochondrial carrier protein	IPR018108	2	1	1	1	1	1	1	1	1	1	1	1	1	1	1	1	1	1	1	20
OG0001419	ADP-ribosylation factor family	IPR006689	1	1	1	1	1	2	1	1	1	1	1	1	1	1	1	1	1	1	1	20
OG0001420	Putative serine esterase (DUF676)	IPR007751	1	1	1	1	2	1	1	1	1	1	1	1	1	1	1	1	1	1	1	20
OG0001421	Domain of unknown function (DUF1771)	IPR013899	2	1	1	1	1	1	1	1	1	1	1	1	1	1	1	1	1	1	1	20
OG0001422	Cgr1 family	IPR005579	1	1	1	1	2	2	1	1	1	1	1	1	1	1	1	1	1	1	0	20
OG0001423	Glutathione S-transferase, C-terminal domain	IPR004046	1	1	1	1	1	1	1	1	1	1	1	1	1	1	1	1	2	1	1	20
OG0001424	Carbohydrate kinase	IPR000631	1	1	1	1	2	1	1	1	1	1	1	1	1	1	1	1	1	1	1	20
OG0001425			2	1	1	1	1	1	1	1	1	1	1	1	1	1	1	1	1	1	1	20
OG0001426	NAD dependent epimerase/dehydratase family	IPR001509	2	1	1	1	1	1	1	1	1	1	1	1	1	1	1	1	1	2	0	20
OG0001427	Patatin-like phospholipase	IPR002641	2	1	1	1	1	1	1	1	1	1	1	1	1	1	1	1	1	1	1	20
OG0001428	Domain of unknown function (DUF1917)	IPR015034	2	1	1	1	1	1	1	1	1	1	1	1	1	1	1	1	1	1	1	20
OG0001429	ANTH domain	IPR011417	2	1	1	1	1	1	1	1	1	1	1	1	1	1	1	1	1	1	1	20
OG0001430	Isocitrate/isopropylmalate dehydrogenase	IPR024084	1	1	1	1	1	1	1	1	1	1	1	1	1	1	1	1	1	1	2	20
OG0001431	Macro domain	IPR002589	2	1	1	1	1	1	1	1	1	1	1	1	1	1	1	1	1	1	1	20
OG0001432	Elongation factor Tu C-terminal domain	IPR004160	1	1	1	1	1	1	1	1	1	1	1	1	1	1	1	1	1	1	2	20
OG0001433	Enoyl-CoA hydratase/isomerase	IPR001753	2	1	1	1	1	1	1	1	1	1	1	1	1	1	1	1	1	1	1	20
OG0001434	DEAD/DEAH box helicase	IPR011545	1	1	1	1	2	1	1	1	1	1	1	1	1	1	1	1	1	1	1	20
OG0001435	JmjC domain, hydroxylase	IPR003347	2	1	1	1	1	1	1	1	1	1	1	1	1	1	1	1	1	1	1	20
OG0001436	Family of unknown function (DUF572)	IPR007590	2	1	1	1	1	1	1	1	1	1	1	1	1	1	1	1	1	1	1	20
OG0001437	C1 domain	IPR004146	1	1	1	1	1	2	1	1	1	1	1	1	1	1	1	1	1	1	1	20
OG0001438	KRI1-like family	IPR018034	1	1	1	1	1	2	1	1	1	1	1	1	1	1	1	1	1	1	1	20
OG0001439	Fungal specific transcription factor domain	IPR007219	1	1	1	1	1	2	1	1	1	1	1	1	1	1	1	1	1	1	1	20
OG0001440	Amino acid permease	IPR004841	2	1	1	1	1	1	1	1	1	1	1	1	1	1	1	1	1	1	1	20
OG0001441	alpha/beta hydrolase fold	IPR000073	1	2	1	1	1	2	1	1	1	1	1	1	1	1	1	1	1	1	0	20
OG0001442	Erg28 like protein	IPR005352	1	1	1	1	2	1	1	1	1	1	1	1	1	1	1	1	1	1	1	20
OG0001443	ATPase family associated with various cellular activities (AAA)	IPR003959	2	1	1	1	1	1	1	1	1	1	1	1	1	1	1	1	1	1	1	20
OG0001444	Myb-like DNA-binding domain	IPR001005	1	1	1	1	2	1	1	1	1	1	1	1	1	1	1	1	1	1	1	20
OG0001445	Major Facilitator Superfamily	IPR011701	2	1	1	1	1	1	1	1	1	1	1	1	1	1	1	1	1	1	1	20
OG0001446	Chitin synthase		1	1	1	1	2	1	1	1	1	1	1	1	1	1	1	1	1	1	1	20
OG0001447	40S ribosome biogenesis protein Tsr1 and BMS1 C-terminal	IPR007034	1	1	1	1	1	1	1	1	1	1	1	1	1	1	1	1	1	1	2	20
OG0001448	Enoyl-(Acyl carrier protein) reductase		1	1	1	1	2	1	1	1	1	1	1	1	1	1	1	1	1	1	1	20
OG0001449	Oxidoreductase family, C-terminal alpha/beta domain	IPR004104	1	1	1	1	1	1	1	1	1	1	1	1	1	1	1	1	1	1	2	20
OG0001450	Acetyltransferase (GNAT) family	IPR000182	1	1	1	1	1	2	1	1	1	1	1	1	1	1	1	1	1	1	1	20
OG0001451	Palmitoyl protein thioesterase	IPR002472	1	1	1	1	1	2	1	1	1	1	1	1	1	1	1	1	1	1	1	20
OG0001452	Actin	IPR004000	1	1	1	1	1	2	1	1	1	1	1	1	1	1	1	1	1	1	1	20
OG0001453	Chromatin associated protein KTI12	IPR013641	1	1	1	1	1	2	1	1	1	1	1	1	1	1	1	1	1	1	1	20
OG0001454	Acyltransferase family	IPR002656	1	1	1	1	2	1	1	1	1	1	1	1	1	1	1	1	1	1	1	20
OG0001455	Fms-interacting protein	IPR019163	1	1	1	1	1	2	1	1	1	1	1	1	1	1	1	1	1	1	1	20
OG0001456	Acetyl-coenzyme A transporter 1	IPR024371	2	1	1	1	0	2	1	1	1	1	1	1	1	1	1	1	1	1	1	20
OG0001457	Glycosyltransferase family 20	IPR001830	1	1	1	1	2	1	1	1	1	1	1	1	1	1	1	1	1	1	1	20
OG0001458	Peroxisomal membrane anchor protein (Pex14p) conserved region	IPR006785	1	1	1	1	2	1	1	1	1	1	1	1	1	1	1	1	1	1	1	20
OG0001459	Domain of unknown function (DUF1726)	IPR013562	1	1	1	1	2	1	1	1	1	1	1	1	1	1	1	1	1	1	1	20
OG0001460	Dehydrogenase E1 component	IPR001017	1	1	1	1	1	1	1	1	1	1	1	1	1	1	1	2	1	1	1	20
OG0001461	Eukaryotic elongation factor 5A hypusine, DNA-binding OB fold	IPR020189	1	1	1	1	1	1	1	1	1	1	1	1	1	1	1	1	1	1	2	20
OG0001462	NmrA-like family	IPR008030	1	1	1	1	2	1	1	1	1	1	1	1	1	1	1	1	1	1	1	20
OG0001463	Polyketide synthase, enoylreductase	IPR011032|IPR013149|IPR013154|IPR020843|IPR036291	1	1	1	1	4	0	0	0	0	0	0	2	2	2	2	3	0	1	0	20
OG0001464	Alpha-acetolactate decarboxylase	IPR005128	1	1	1	1	2	1	1	1	1	1	1	1	1	1	1	1	1	1	1	20
OG0001465	Uncharacterised protein family (UPF0121)	IPR005344	2	1	1	1	1	1	1	1	1	1	1	1	1	1	1	1	1	1	1	20
OG0001466	Maintenance of mitochondrial morphology protein 1	IPR019411	1	1	1	1	2	1	1	1	1	1	1	1	1	1	1	1	1	1	1	20
OG0001467	Myb DNA-binding like		2	1	1	1	1	1	1	1	1	1	1	1	1	1	1	1	1	1	1	20
OG0001468	Ubiquitin-2 like Rad60 SUMO-like	IPR022617	1	1	1	1	1	2	1	1	1	1	1	1	1	1	1	1	1	1	1	20
OG0001469	Eukaryotic aspartyl protease	IPR033121	1	1	1	1	2	1	1	1	1	1	1	1	1	1	1	1	1	1	1	20
OG0001470	Diacylglycerol acyltransferase	IPR007130	1	1	1	1	1	2	1	1	1	1	1	1	1	1	1	1	1	1	1	20
OG0001471	Diphthamide synthase	IPR002761	1	1	1	1	1	2	1	1	1	1	1	1	1	1	1	1	1	1	1	20
OG0001472	Helix-hairpin-helix motif	IPR000445	1	1	1	1	1	2	1	1	1	1	1	1	1	1	1	1	1	1	1	20
OG0001473	Fungal specific transcription factor domain-containing protein	IPR001138|IPR021858|IPR036864	4	1	1	1	5	0	0	0	0	0	0	1	1	1	1	1	1	1	1	20
OG0001474	Major Facilitator Superfamily	IPR011701	1	1	1	1	1	1	1	1	1	1	1	1	2	1	1	1	1	1	1	20
OG0001475	Iron-containing alcohol dehydrogenase	IPR001670	1	1	1	1	1	2	1	1	1	1	1	1	1	1	1	1	1	1	1	20
OG0001476	D-isomer specific 2-hydroxyacid dehydrogenase, NAD binding domain	IPR006140	1	1	1	1	1	1	1	1	1	1	1	1	1	1	1	1	1	2	1	20
OG0001477	Alpha/beta hydrolase family	IPR000073	1	1	1	1	1	2	1	1	1	1	1	1	1	1	1	1	1	1	1	20
OG0001478	CoA-transferase family III	IPR003673	1	1	1	1	2	1	1	1	1	1	1	1	1	1	1	1	1	1	1	20
OG0001479	Acetyltransferase (GNAT) domain	IPR000182	1	1	1	1	2	1	1	1	1	1	1	1	1	1	1	1	1	1	1	20
OG0001480	RNSP1-SAP18 binding (RSB) motif	IPR032552	1	1	1	1	1	1	1	1	1	1	1	1	1	1	1	1	1	1	2	20
OG0001481	Eukaryotic phosphomannomutase	IPR005002	1	1	1	1	1	1	1	1	1	1	1	1	1	1	1	1	1	1	2	20
OG0001482	Arrestin (or S-antigen), N-terminal domain	IPR011021	1	1	1	1	2	1	1	1	1	1	1	1	1	1	1	1	1	1	1	20
OG0001483	FAD dependent oxidoreductase	IPR006076	1	1	1	1	1	2	1	1	1	1	1	1	1	1	1	1	1	1	1	20
OG0001484	Transcription factor TFIID (or TATA-binding protein, TBP)	IPR000814	1	1	1	1	1	2	1	1	1	1	1	1	1	1	1	1	1	1	1	20
OG0001485	CAAX prenyl protease N-terminal, five membrane helices	IPR032456	1	1	1	1	1	2	1	1	1	1	1	1	1	1	1	1	1	1	1	20
OG0001486	Acetyltransferase (GNAT) domain	IPR000182	2	1	1	1	1	1	1	1	1	1	1	1	1	1	1	1	1	1	1	20
OG0001487	HSA	IPR014012	2	1	1	1	1	1	1	1	1	1	1	1	1	1	1	1	1	1	1	20
OG0001488	Beta galactosidase small chain	IPR004199	1	1	1	1	1	2	1	1	1	1	1	1	1	1	1	1	1	1	1	20
OG0001489	Fungal specific transcription factor domain	IPR021858	2	1	1	1	1	1	1	1	1	1	1	1	1	1	1	1	1	1	1	20
OG0001490	Alpha/beta hydrolase family	IPR000073	1	1	1	1	2	1	1	1	1	1	1	1	1	1	1	1	1	1	1	20
OG0001491	Major Facilitator Superfamily	IPR011701	1	1	1	1	1	1	1	1	1	1	1	1	1	1	1	2	1	1	1	20
OG0001492	Major Facilitator Superfamily	IPR011701	2	1	1	1	1	1	1	1	1	1	1	1	1	1	1	1	1	1	1	20
OG0001493	LSM domain	IPR001163	2	1	1	1	1	1	1	1	1	1	1	1	1	1	1	1	1	1	1	20
OG0001494	Sodium:solute symporter family	IPR001734	1	1	1	1	1	1	1	1	1	1	1	1	1	1	1	1	1	2	1	20
OG0001495	Alpha amylase, catalytic domain	IPR006047	2	1	1	1	1	1	1	1	1	1	1	1	1	1	1	1	1	1	1	20
OG0001496	Fusaric acid resistance protein-like		1	1	1	1	1	2	1	1	1	1	1	1	1	1	1	1	1	1	1	20
OG0001497	Chitin biosynthesis protein CHS5 N-terminus	IPR031673	1	1	1	1	1	2	1	1	1	1	1	1	1	1	1	1	1	1	1	20
OG0001498	Competence-damaged protein	IPR008136	1	1	1	1	1	2	1	1	1	1	1	1	1	1	1	1	1	1	1	20
OG0001499	Malate synthase	IPR001465	1	1	1	1	2	1	1	1	1	1	1	1	1	1	1	1	1	1	1	20
OG0001500	CUE domain	IPR003892	1	1	1	1	2	1	1	1	1	1	1	1	1	1	1	1	1	1	1	20
OG0001501	Methyltransferase domain		1	1	1	1	1	2	1	1	1	1	1	1	1	1	1	1	1	1	1	20
OG0001502	CorA-like Mg2+ transporter protein	IPR002523	1	1	1	1	1	2	1	1	1	1	1	1	1	1	1	1	1	1	1	20
OG0001503	MOSC domain	IPR005302	1	1	1	1	2	1	1	1	1	1	1	1	1	1	1	1	1	1	1	20
OG0001504	eRF1 domain 1	IPR005140	2	1	1	1	1	1	1	1	1	1	1	1	1	1	1	1	1	1	1	20
OG0001505	Hus1-like protein	IPR007150	2	1	1	1	1	1	1	1	1	1	1	1	1	1	1	1	1	1	1	20
OG0001506	Glycosyl hydrolase family 47	IPR001382	2	1	1	1	1	1	1	1	1	1	1	1	1	1	1	1	1	1	1	20
OG0001507	Major Facilitator Superfamily	IPR011701	1	1	1	1	1	1	1	1	1	1	1	1	1	1	1	1	1	1	2	20
OG0001508	Glyoxalase/Bleomycin resistance protein/Dioxygenase superfamily	IPR004360	2	1	1	1	1	1	1	1	1	1	1	1	1	1	1	1	1	1	1	20
OG0001509	ATP synthase subunit C	IPR002379	2	1	1	1	1	1	1	1	1	1	1	1	1	1	1	1	1	1	1	20
OG0001510	C-terminal four TMM region of protein-O-mannosyltransferase	IPR032421	2	1	1	1	1	1	1	1	1	1	1	1	1	1	1	1	1	1	1	20
OG0001511	ATPase family associated with various cellular activities (AAA)	IPR003959	1	1	1	1	1	1	1	1	1	1	2	1	1	1	1	1	1	1	1	20
OG0001512	Mitochondrial 39-S ribosomal protein L47 (MRP-L47)	IPR010729	1	1	1	1	1	2	1	1	1	1	1	1	1	1	1	1	1	1	1	20
OG0001513	JAB1/Mov34/MPN/PAD-1 ubiquitin protease	IPR000555	1	1	1	1	1	2	1	1	1	1	1	1	1	1	1	1	1	1	1	20
OG0001514	Fungal specific transcription factor domain	IPR007219	1	1	1	1	1	2	1	1	1	1	1	1	1	1	1	1	1	1	1	20
OG0001515	Frequency clock protein	IPR018554	1	1	1	1	1	2	1	1	1	1	1	1	1	1	1	1	1	1	1	20
OG0001516	CBP4	IPR012420	1	1	1	1	2	1	1	1	1	1	1	1	1	1	1	1	1	1	1	20
OG0001517	Argonaute linker 1 domain	IPR014811	1	1	1	1	2	1	1	1	1	1	1	1	1	1	1	1	1	1	1	20
OG0001518	Suppressor of forked protein (Suf)	IPR008847	1	1	1	1	2	1	1	1	1	1	1	1	1	1	1	1	1	1	1	20
OG0001519	Regulator of chromosome condensation (RCC1) repeat		1	1	1	1	1	2	1	1	1	1	1	1	1	1	1	1	1	1	1	20
OG0001520	MRC1-like domain	IPR018564	1	1	1	1	1	2	1	1	1	1	1	1	1	1	1	1	1	1	1	20
OG0001521	FAD binding domain	IPR002938	1	1	1	1	2	1	1	1	1	1	1	1	1	1	1	1	1	1	1	20
OG0001522	Protein of unknown function (DUF1446)	IPR010839	1	1	1	1	2	1	1	1	1	1	1	1	1	1	1	1	1	1	1	20
OG0001523	Hsp20/alpha crystallin family	IPR002068	1	1	1	1	2	1	1	1	1	1	1	1	1	1	1	1	1	1	1	20
OG0001524	Ribosomal protein S10p/S20e	IPR027486	1	1	1	1	2	1	1	1	1	1	1	1	1	1	1	1	1	1	1	20
OG0001525	E1-E2 ATPase	IPR008250	1	1	1	1	2	1	1	1	1	1	1	1	1	1	1	1	1	1	1	20
OG0001526	C-terminal duplication domain of Friend of PRMT1	IPR025715	3	1	1	1	1	1	1	1	1	1	1	0	1	1	1	1	1	1	1	20
OG0001527	NAD dependent epimerase/dehydratase family	IPR001509	1	1	1	1	1	2	1	1	1	1	1	1	1	1	1	1	1	1	1	20
OG0001528	Enolase C-terminal domain-like	IPR029065	1	1	1	1	1	2	1	1	1	1	1	1	1	1	1	1	1	1	1	20
OG0001529	Fungal specific transcription factor domain	IPR007219	1	1	1	1	1	2	1	1	1	1	1	1	1	1	1	1	1	1	1	20
OG0001530	HAD-hyrolase-like		2	1	1	1	1	1	1	1	1	1	1	1	1	1	1	1	1	1	1	20
OG0001531	D-isomer specific 2-hydroxyacid dehydrogenase, catalytic domain	IPR006139	2	1	1	1	1	1	1	1	1	1	1	1	1	1	1	1	1	1	1	20
OG0001532	Major Facilitator Superfamily	IPR011701	2	1	1	1	0	1	1	1	1	1	1	1	1	1	1	2	1	1	1	20
OG0001533	Possible lysine decarboxylase	IPR031100	1	1	1	1	1	2	1	1	1	1	1	1	1	1	1	1	1	1	1	20
OG0001534	Actin	IPR004000	2	1	1	1	1	1	1	1	1	1	1	1	1	1	1	1	1	1	1	20
OG0001535	GHMP kinases N terminal domain	IPR006204	1	1	1	1	2	1	1	1	1	1	1	1	1	1	1	1	1	1	1	20
OG0001536	alpha/beta hydrolase fold	IPR000073	1	1	1	1	2	1	1	1	1	1	1	1	1	1	1	1	1	1	1	20
OG0001537	GMC oxidoreductase	IPR000172	2	1	1	1	1	1	1	1	1	1	1	1	1	1	1	1	1	1	1	20
OG0001538	alpha/beta hydrolase fold	IPR013094	1	1	1	1	2	1	1	1	1	1	1	1	1	1	1	1	1	1	1	20
OG0001539	Fungal specific transcription factor domain	IPR007219	2	1	1	1	1	1	1	1	1	1	1	1	1	1	1	1	1	1	1	20
OG0001540	Glycosyltransferase like family 2		2	1	1	1	1	1	1	1	1	1	1	1	1	1	1	1	1	1	1	20
OG0001541	Glycosyl hydrolase family 12	IPR002594	1	1	1	1	2	1	1	1	1	1	1	1	1	1	1	1	1	1	1	20
OG0001542	Aldehyde dehydrogenase family	IPR015590	1	1	1	1	1	1	1	1	1	1	1	1	1	1	1	1	1	1	2	20
OG0001543	CRAL/TRIO domain	IPR001251	2	1	1	1	1	1	1	1	1	1	1	1	1	1	1	1	1	1	1	20
OG0001544	Aminotransferase class-V	IPR000192	1	1	1	1	1	2	1	1	1	1	1	1	1	1	1	1	1	1	1	20
OG0001545	Cid1 family poly A polymerase	IPR002058	1	1	1	1	1	1	1	1	1	1	1	1	1	1	1	1	2	1	1	20
OG0001546	Protein kinase domain	IPR000719	1	1	1	1	2	1	1	1	1	1	1	1	1	1	1	1	1	1	1	20
OG0001547	lactate/malate dehydrogenase, alpha/beta C-terminal domain	IPR022383	1	1	1	1	2	1	1	1	1	1	1	1	1	1	1	1	1	1	1	20
OG0001548	Methyltransferase domain	IPR013216	1	1	1	1	1	2	1	1	1	1	1	1	1	1	1	1	1	1	1	20
OG0001549	YIF1	IPR005578	2	1	1	1	1	1	1	1	1	1	1	1	1	1	1	1	1	1	1	20
OG0001550	FAD binding domain	IPR003953	2	1	1	1	1	1	1	1	1	1	1	1	1	1	1	1	1	1	1	20
OG0001551	Oxysterol-binding protein	IPR000648	2	1	1	1	1	1	1	1	1	1	1	1	1	1	1	1	1	1	1	20
OG0001552	Major Facilitator Superfamily	IPR011701	1	1	1	1	2	1	1	1	1	1	1	1	1	1	1	1	1	1	1	20
OG0001553	Adaptor complexes medium subunit family	IPR028565	1	1	1	1	2	1	1	1	1	1	1	1	1	1	1	1	1	1	1	20
OG0001554	Methyltransferase domain	IPR025714	1	1	1	1	1	2	1	1	1	1	1	1	1	1	1	1	1	1	1	20
OG0001555	Mediator of RNA polymerase II transcription subunit 1	IPR019680	1	1	1	1	1	2	1	1	1	1	1	1	1	1	1	1	1	1	1	20
OG0001556	short chain dehydrogenase	IPR002347	1	1	1	1	1	1	1	1	1	1	1	1	1	1	1	1	2	1	1	20
OG0001557	Acetohydroxy acid isomeroreductase, catalytic domain	IPR000506	1	1	1	1	2	1	1	1	1	1	1	1	1	1	1	1	1	1	1	20
OG0001558	Fungal Zn(2)-Cys(6) binuclear cluster domain	IPR001138	2	1	1	1	1	1	1	1	1	1	1	1	1	1	1	1	1	1	1	20
OG0001559	Isocitrate/isopropylmalate dehydrogenase	IPR024084	2	1	1	1	1	1	1	1	1	1	1	1	1	1	1	1	1	1	1	20
OG0001560	Exocyst complex component Sec5		1	1	1	1	2	1	1	1	1	1	1	1	1	1	1	1	1	1	1	20
OG0001561	Histidine phosphatase superfamily (branch 2)	IPR000560	1	1	1	1	1	2	1	1	1	1	1	1	1	1	1	1	1	1	1	20
OG0001562	Mitochondrial ribosomal protein L51 / S25 / CI-B8 domain	IPR007741	1	1	1	1	1	2	1	1	1	1	1	1	1	1	1	1	1	1	1	20
OG0001563	PAP2 superfamily	IPR000326	1	1	1	1	2	1	1	1	1	1	1	1	1	1	1	1	1	1	1	20
OG0001564	RNA recognition motif 2	IPR007201	1	1	1	1	1	1	1	1	1	1	1	1	1	1	1	1	1	1	2	20
OG0001565	Thioesterase-like superfamily		1	1	1	1	1	2	1	1	1	1	1	1	1	1	1	1	1	1	1	20
OG0001566	Amidase	IPR023631	1	1	1	1	1	1	1	1	1	1	2	1	1	1	1	1	1	1	1	20
OG0001567	4F5 protein family	IPR007513	2	1	1	1	1	1	1	1	1	1	1	1	1	1	1	1	1	1	1	20
OG0001568	Adenosine-deaminase (editase) domain	IPR002466	1	1	1	1	2	1	1	1	1	1	1	1	1	1	1	1	1	1	1	20
OG0001569	Cupin	IPR006045	1	1	1	1	2	1	1	1	1	1	1	1	1	1	1	1	1	1	1	20
OG0001570	N-terminal domain of oxidoreductase		2	1	1	1	1	1	1	1	1	1	1	1	1	1	1	1	1	1	1	20
OG0001571	Protein of unknown function (DUF1279)	IPR009688	1	1	1	1	2	1	1	1	1	1	1	1	1	1	1	1	1	1	1	20
OG0001572	PQ loop repeat	IPR006603	1	1	1	1	1	1	1	1	1	1	1	1	1	1	1	1	2	1	1	20
OG0001573	Fcf1	IPR006984	1	1	1	1	1	1	1	1	1	1	1	1	1	1	1	1	2	1	1	20
OG0001574	T5orf172 domain	IPR018306	1	1	1	1	1	1	1	1	1	1	1	1	1	1	1	1	2	1	1	20
OG0001575	Altered inheritance of mitochondria 5	IPR031463	1	1	1	1	1	2	1	1	1	1	1	1	1	1	1	1	1	1	1	20
OG0001576	Amino acid permease	IPR002293	2	1	1	1	1	1	1	1	1	1	1	1	1	1	1	1	1	1	1	20
OG0001577	Exocyst complex component Sec6	IPR010326	2	1	1	1	1	1	1	1	1	1	1	1	1	1	1	1	1	1	1	20
OG0001578	Est1 DNA/RNA binding domain	IPR018834	2	1	1	1	1	1	1	1	1	1	1	1	1	1	1	1	1	1	1	20
OG0001579	Beta-lactamase	IPR001466	2	1	1	1	1	1	1	1	1	1	1	1	1	1	1	1	1	1	1	20
OG0001580	PLD-like domain	IPR025202	2	1	1	1	1	1	1	1	1	1	1	1	1	1	1	1	1	1	1	20
OG0001581	ABC transporter	IPR003439	1	1	1	1	2	1	1	1	1	1	1	1	1	1	1	1	1	1	1	20
OG0001582	5'-nucleotidase, C-terminal domain	IPR008334	1	1	1	1	2	1	1	1	1	1	1	1	1	1	1	1	1	1	1	20
OG0001583	ATPase family associated with various cellular activities (AAA)	IPR003959	2	1	1	1	1	1	1	1	1	1	1	1	1	1	1	1	1	1	1	20
OG0001584	Acyltransferase family	IPR002656	1	1	1	1	1	1	1	1	1	1	1	1	1	1	1	1	2	1	1	20
OG0001585	Partial alpha/beta-hydrolase lipase region	IPR006693	1	1	1	1	2	1	1	1	1	1	1	1	1	1	1	1	1	1	1	20
OG0001586	BAR domain	IPR004148	1	1	1	1	2	1	1	1	1	1	1	1	1	1	1	1	1	1	1	20
OG0001587	Alg9-like mannosyltransferase family	IPR005599	1	1	1	1	2	1	1	1	1	1	1	1	1	1	1	1	1	1	1	20
OG0001588	Anthranilate synthase component I, N terminal region	IPR006805	1	1	1	1	1	2	1	1	1	1	1	1	1	1	1	1	1	1	1	20
OG0001589	Ribosomal L29e protein family	IPR002673	2	1	1	1	1	1	1	1	1	1	1	1	1	1	1	1	1	1	1	20
OG0001590	Transferase family	IPR003480	1	1	1	1	1	2	1	1	1	1	1	1	1	1	1	1	1	1	1	20
OG0001591	Caffeine-induced death protein 2	IPR019171	1	1	1	1	2	1	1	1	1	1	1	1	1	1	1	1	1	1	1	20
OG0001592	Biotin and Thiamin Synthesis associated domain	IPR010722	2	1	1	1	1	1	1	1	1	1	1	1	1	1	1	1	1	1	1	20
OG0001593	MCRA family	IPR010354	1	1	1	1	1	2	1	1	1	1	1	1	1	1	1	1	1	1	1	20
OG0001594	Cyclic nucleotide-binding domain	IPR000595	1	1	1	1	1	1	1	1	1	1	1	1	1	1	1	1	2	1	1	20
OG0001595	Putative FMN-binding domain	IPR007396	1	1	1	1	1	2	1	1	1	1	1	1	1	1	2	1	1	1	0	20
OG0001596	Cation transport ATPase (P-type)		1	1	1	1	2	1	1	1	1	1	1	1	1	1	1	1	1	1	1	20
OG0001597	Alpha/beta hydrolase family	IPR000073	1	1	1	1	1	2	1	1	1	1	1	1	1	1	1	1	1	1	1	20
OG0001598	Promethin		1	1	1	1	1	2	1	1	1	1	1	1	1	1	1	1	1	1	1	20
OG0001599	Cytochrome P450	IPR001128	1	1	1	1	0	1	1	1	1	1	1	1	1	1	1	1	1	1	3	20
OG0001600	2-oxoacid dehydrogenases acyltransferase (catalytic domain)	IPR001078	1	1	1	1	1	2	1	1	1	1	1	1	1	1	1	1	1	1	1	20
OG0001601	Phosphotransferase enzyme family	IPR002575	1	1	1	1	2	1	1	1	1	1	1	1	1	1	1	1	1	1	1	20
OG0001602	BRO1-like domain	IPR004328	2	1	1	1	1	1	1	1	1	1	1	1	1	1	1	1	1	1	1	20
OG0001603	FAD-binding domain	IPR013112	1	1	1	1	1	1	1	1	1	1	1	1	1	1	2	1	1	1	1	20
OG0001604	AMP-binding enzyme	IPR000873	2	1	1	1	1	1	1	1	1	1	1	1	1	1	1	1	1	1	1	20
OG0001605	DNA photolyase	IPR006050	1	1	1	2	1	1	1	1	1	1	1	1	1	1	1	1	1	1	1	20
OG0001606	Fungal Zn(2)-Cys(6) binuclear cluster domain	IPR001138	1	1	1	1	2	1	1	1	1	1	1	1	1	1	1	1	1	1	1	20
OG0001607	Domain of unknown function (DUF4203)	IPR025256	1	1	1	1	1	2	1	1	1	1	1	1	1	1	1	1	1	1	1	20
OG0001608	Polysaccharide deacetylase	IPR002509	1	1	1	1	2	1	1	1	1	1	1	1	1	1	1	1	1	1	1	20
OG0001609	Las17-binding protein actin regulator	IPR007461	2	1	1	1	1	1	1	1	1	1	1	1	1	1	1	1	1	1	1	20
OG0001610	alpha/beta hydrolase fold	IPR000073	1	1	1	1	1	1	1	1	1	1	1	1	1	1	1	1	2	1	1	20
OG0001611	Alpha/beta hydrolase family	IPR000073	1	1	1	1	2	1	1	1	1	1	1	1	1	1	1	1	1	1	1	20
OG0001612	ABC transporter	IPR003439	2	1	1	1	1	1	1	1	1	1	1	1	1	1	1	1	1	1	1	20
OG0001613	G-patch domain	IPR000467	2	1	1	1	1	1	1	1	1	1	1	1	1	1	1	1	1	1	1	20
OG0001614	Isochorismatase family	IPR000868	1	1	1	1	1	1	1	1	1	1	1	1	1	1	1	1	2	1	1	20
OG0001615	NmrA-like family	IPR008030	1	1	1	1	1	2	1	1	1	1	1	1	1	1	1	1	1	1	1	20
OG0001616	Cyclophilin type peptidyl-prolyl cis-trans isomerase/CLD	IPR002130	1	1	1	1	1	1	1	1	1	1	1	1	1	1	1	1	2	1	1	20
OG0001617	Timeless protein	IPR006906	2	1	1	1	0	1	1	1	1	1	1	1	1	1	1	1	1	1	2	20
OG0001618	HIT domain	IPR001310	2	1	1	1	1	1	1	1	1	1	1	1	1	1	1	1	1	1	1	20
OG0001619	Alcohol dehydrogenase GroES-like domain	IPR013154	1	1	1	1	1	1	1	1	1	1	1	1	2	1	1	1	1	1	1	20
OG0001620	2OG-Fe(II) oxygenase superfamily	IPR027450	2	1	1	1	1	1	1	1	1	1	1	1	1	1	1	1	1	1	1	20
OG0001621	FHA domain	IPR000253	1	1	1	1	2	1	1	1	1	1	1	1	1	1	1	1	1	1	1	20
OG0001622	Sugar (and other) transporter	IPR005828	1	1	1	1	2	1	1	1	1	1	1	1	1	1	1	1	1	1	1	20
OG0001623	FAD binding domain	IPR002938	2	1	1	0	2	1	1	1	1	1	1	1	1	1	1	1	1	1	1	20
OG0001624	Major Facilitator Superfamily	IPR011701	2	1	1	1	1	1	1	1	1	1	1	1	1	1	1	1	1	1	1	20
OG0001625			1	1	1	1	2	1	1	1	1	1	1	1	1	1	1	1	1	1	1	20
OG0001626	GDA1/CD39 (nucleoside phosphatase) family	IPR000407	1	1	1	1	1	2	1	1	1	1	1	1	1	1	1	1	1	1	1	20
OG0001627	Folliculin-interacting protein N-terminus	IPR028084	1	1	1	1	1	2	1	1	1	1	1	1	1	1	1	1	1	1	1	20
OG0001628	Aft1 HRA domain	IPR021755	1	1	1	1	2	1	1	1	1	1	1	1	1	1	1	1	1	1	1	20
OG0001629	Alternative oxidase	IPR002680	1	1	1	1	1	2	1	1	1	1	1	1	1	1	1	1	1	1	1	20
OG0001630	Ammonium Transporter Family	IPR024041	1	1	1	1	1	1	1	1	1	1	1	1	2	1	1	1	1	1	1	20
OG0001631	Ribosomal protein L4/L1 family	IPR002136	2	1	1	1	1	1	1	1	1	1	1	1	1	1	1	1	1	1	1	20
OG0001632	HSF-type DNA-binding	IPR000232	2	1	1	1	1	1	1	1	1	1	1	1	1	1	1	1	1	1	1	20
OG0001633	Glutamine amidotransferases class-II	IPR026869	1	1	1	1	1	2	1	1	1	1	1	1	1	1	1	1	1	1	1	20
OG0001634	Snf7	IPR005024	1	1	1	1	2	1	1	1	1	1	1	1	1	1	1	1	1	1	1	20
OG0001635	Autophagy protein Apg9	IPR007241	1	1	1	1	1	2	1	1	1	1	1	1	1	1	1	1	1	1	1	20
OG0001636	CSN8/PSMD8/EIF3K family	IPR033464	1	1	1	1	1	2	1	1	1	1	1	1	1	1	1	1	1	1	1	20
OG0001637	Ribosomal protein S6	IPR000529	1	1	1	1	1	2	1	1	1	1	1	1	1	1	1	1	1	1	1	20
OG0001638	Exosome complex exonuclease RRP4 N-terminal region	IPR025721	1	1	1	1	2	1	1	1	1	1	1	1	1	1	1	1	1	1	1	20
OG0001639	CAAX protease self-immunity	IPR003675	2	1	1	1	1	1	1	1	1	1	1	1	1	1	1	1	1	1	1	20
OG0001640	RFX DNA-binding domain	IPR003150	1	1	1	2	0	2	1	1	1	1	1	1	1	1	1	1	1	1	1	20
OG0001641	Domain of unknown function (DUF367)	IPR007177	1	1	1	1	1	2	1	1	1	1	1	1	1	1	1	1	1	1	1	20
OG0001642	ATP phosphoribosyltransferase	IPR013820	2	1	1	1	1	1	1	1	1	1	1	1	1	1	1	1	1	1	1	20
OG0001643	Major Facilitator Superfamily	IPR011701	2	1	1	1	1	1	1	1	1	1	1	1	1	1	1	1	1	1	1	20
OG0001644	Oxysterol-binding protein	IPR000648	1	1	1	1	1	1	1	1	1	1	1	1	1	1	1	1	1	1	2	20
OG0001645	DEAD/DEAH box helicase	IPR011545	1	1	1	1	1	2	1	1	1	1	1	1	1	1	1	1	1	1	1	20
OG0001646	Endoribonuclease L-PSP	IPR006175	1	1	1	1	2	1	1	1	1	1	1	1	1	1	1	1	1	1	1	20
OG0001647	short chain dehydrogenase	IPR002347	1	1	1	1	1	2	1	1	1	1	1	1	1	1	1	1	1	1	1	20
OG0001648	Fungal specific transcription factor domain	IPR021858	1	1	1	1	1	2	1	1	1	1	1	1	1	1	1	1	1	1	1	20
OG0001649	D-isomer specific 2-hydroxyacid dehydrogenase, NAD binding domain	IPR006140	1	1	1	1	1	2	1	1	1	1	1	1	1	1	1	1	1	1	1	20
OG0001650	Adaptin N terminal region	IPR002553	1	1	1	1	2	1	1	1	1	1	1	1	1	1	1	1	1	1	1	20
OG0001651	Amino acid permease	IPR002293	1	1	1	1	1	2	1	1	1	1	1	1	1	1	1	1	1	1	1	20
OG0001652	Fungal Zn(2)-Cys(6) binuclear cluster domain	IPR001138	1	1	1	1	1	2	1	1	1	1	1	1	1	1	1	1	1	1	1	20
OG0001653	GHMP kinases N terminal domain	IPR006204	2	1	1	1	1	1	1	1	1	1	1	1	1	1	1	1	1	1	1	20
OG0001654	alpha/beta hydrolase fold	IPR013094	1	1	1	1	1	2	1	1	1	1	1	1	1	1	1	1	1	1	1	20
OG0001655	ABC transporter	IPR003439	1	1	1	1	1	2	1	1	1	1	1	1	1	1	1	1	1	1	1	20
OG0001656	DNA polymerase family A	IPR001098	1	1	1	1	2	1	1	1	1	1	1	1	1	1	1	1	1	1	1	20
OG0001657	Thioesterase superfamily	IPR006683	1	1	1	1	1	2	1	1	1	1	1	1	1	1	1	1	1	1	1	20
OG0001658	C2HE / C2H2 / C2HC zinc-binding finger	IPR032566	1	1	1	1	1	2	1	1	1	1	1	1	1	1	1	1	1	1	1	20
OG0001659	Amidohydrolase family	IPR006680	2	1	1	1	1	1	1	1	1	1	1	1	1	1	1	1	1	1	1	20
OG0001660	Ribosomal proteins 50S-L18Ae/60S-L20/60S-L18A	IPR023573	1	1	1	1	2	1	1	1	1	1	1	1	1	1	1	1	1	1	1	20
OG0001661	Delta-aminolevulinic acid dehydratase	IPR001731	1	2	1	1	1	1	1	1	1	1	1	1	1	1	1	1	1	1	1	20
OG0001662	non-SMC mitotic condensation complex subunit 1	IPR032682	1	1	1	1	1	2	1	1	1	1	1	1	1	1	1	1	1	1	1	20
OG0001663	Neutral trehalase Ca2+ binding domain	IPR011120	2	1	1	1	1	1	1	1	1	1	1	1	1	1	1	1	1	1	1	20
OG0001664	Mitochondrial carrier protein	IPR018108	1	1	1	1	2	1	1	1	1	1	1	1	1	1	1	1	1	1	1	20
OG0001665	DEAD/DEAH box helicase	IPR011545	1	1	1	1	2	1	1	1	1	1	1	1	1	1	1	1	1	1	1	20
OG0001666	FAD binding domain	IPR002938	1	1	1	1	1	1	1	1	1	1	1	1	1	1	1	1	2	1	1	20
OG0001667	2-oxoacid dehydrogenases acyltransferase (catalytic domain)	IPR001078	1	1	1	1	1	1	1	1	1	1	1	1	1	2	1	1	1	1	1	20
OG0001668	Glycosyltransferase like family 2		2	1	1	1	1	1	1	1	1	1	1	1	1	1	1	1	1	1	1	20
OG0001669	Universal stress protein family	IPR006016	2	1	1	1	1	1	1	1	1	1	1	1	1	1	1	1	1	1	1	20
OG0001670	AMP-binding enzyme	IPR000873	1	1	1	1	2	1	1	1	1	1	1	1	1	1	1	1	1	1	1	20
OG0001671	Cytochrome P450	IPR001128	2	1	1	1	1	1	1	1	1	1	1	1	1	1	1	1	1	1	1	20
OG0001672	Aldo/keto reductase family	IPR023210	1	1	1	1	1	1	1	1	1	1	1	1	1	1	1	1	2	1	1	20
OG0001673	Pyridine nucleotide-disulphide oxidoreductase	IPR023753	2	1	1	1	1	1	1	1	1	1	1	1	1	1	1	1	1	1	1	20
OG0001674	Frag1/DRAM/Sfk1 family	IPR019402	2	1	1	1	1	1	1	1	1	1	1	1	1	1	1	1	1	1	1	20
OG0001675	Eukaryotic aspartyl protease	IPR033121	1	1	1	1	1	1	1	1	1	1	1	1	1	1	1	1	2	1	1	20
OG0001676	Cytochrome P450	IPR001128	1	1	1	1	2	1	1	1	1	1	1	1	1	1	1	1	1	1	1	20
OG0001677	Multicopper oxidase	IPR001117	1	1	1	1	1	1	1	1	1	1	1	1	1	2	1	1	1	1	1	20
OG0001678	Lethal giant larvae(Lgl) like, C-terminal	IPR013905	2	1	1	1	1	1	1	1	1	1	1	1	1	1	1	1	1	1	1	20
OG0001679	Protein kinase domain	IPR000719	2	1	1	1	1	1	1	1	1	1	1	1	1	1	1	1	1	1	1	20
OG0001680	Glycosyltransferase family 28 N-terminal domain	IPR004276	1	1	1	1	2	1	1	1	1	1	1	1	1	1	1	1	1	1	1	20
OG0001681	Squalene/phytoene synthase	IPR002060	2	1	1	1	1	1	1	1	1	1	1	1	1	1	1	1	1	1	1	20
OG0001682	Ig-like domain from next to BRCA1 gene	IPR032350	1	1	1	1	2	1	1	1	1	1	1	1	1	1	1	1	1	1	1	20
OG0001683	CASC3/Barentsz eIF4AIII binding	IPR018545	1	1	1	1	2	1	1	1	1	1	1	1	1	1	1	1	1	1	1	20
OG0001684	ETC complex I subunit conserved region	IPR006885	2	1	1	0	2	1	1	1	1	1	1	1	1	1	1	1	1	1	1	20
OG0001685	Glycosyltransferase family 20	IPR001830	1	1	1	1	1	1	1	1	1	1	1	1	1	1	1	1	2	1	1	20
OG0001686	Snf7	IPR005024	1	1	1	1	1	1	1	1	1	1	1	1	1	1	1	1	1	1	2	20
OG0001687	Amino acid permease	IPR002293	1	1	1	1	2	1	1	1	1	1	1	1	1	1	1	1	1	1	1	20
OG0001688	CP2 transcription factor	IPR007604	2	1	1	1	1	1	1	1	1	1	1	1	1	1	1	1	1	1	1	20
OG0001689	GPR1/FUN34/yaaH family	IPR000791	1	2	1	1	1	1	1	1	1	1	1	1	1	1	1	1	1	1	1	20
OG0001690	Amino acid kinase family	IPR001048	1	1	1	1	2	1	1	1	1	1	1	1	1	1	1	1	1	1	1	20
OG0001691	Caulimovirus viroplasmin	IPR011320	4	1	1	1	1	1	1	1	1	1	0	1	1	1	1	1	0	1	1	20
OG0001692	MFS multidrug transporter-like protein	IPR001411|IPR011701|IPR013094|IPR020846|IPR029058|IPR036259	1	2	2	2	1	0	0	0	0	0	0	2	2	2	2	2	0	2	0	20
OG0001693	Protein of unknown function (DUF3723)	IPR022198	2	1	0	0	3	4	2	3	2	0	2	0	0	0	0	0	1	0	0	20
OG0001694	Caleosin related protein	IPR007736	1	1	1	1	2	1	1	1	1	1	1	1	1	1	1	1	1	1	1	20
OG0001695	RNA polymerase III subunit RPC82	IPR008806	2	1	1	1	1	1	1	1	1	1	1	1	1	1	1	1	1	1	1	20
OG0001696	Insulinase (Peptidase family M16)	IPR011765	1	1	1	1	2	1	1	1	1	1	1	1	1	1	1	1	1	1	1	20
OG0001697	Ubiquitin fusion degradation protein UFD1	IPR004854	2	1	1	1	1	1	1	1	1	1	1	1	1	1	1	1	1	1	1	20
OG0001698		IPR032710	1	2	2	1	1	0	0	0	0	0	0	2	4	3	1	2	0	1	0	20
OG0001699	ACT domain	IPR027795	2	1	1	1	1	1	1	1	1	1	1	1	1	1	1	1	1	1	1	20
OG0001700	Methyltransferase domain	IPR025714	1	3	1	1	0	1	1	1	1	1	1	1	1	1	1	1	1	1	1	20
OG0001701	GTP cyclohydrolase I	IPR020602	1	1	1	1	1	1	1	1	1	1	1	1	1	1	1	1	2	1	1	20
OG0001702	Glycosyltransferase like family 2		2	1	1	1	1	1	1	1	1	1	1	1	1	1	1	1	1	1	1	20
OG0001703	2Fe-2S iron-sulfur cluster binding domain	IPR001041	1	1	1	1	3	1	1	1	1	0	1	1	1	1	1	1	1	1	1	20
OG0001704	Legume-like lectin family	IPR005052	1	2	1	1	1	1	1	1	1	1	1	1	1	1	1	1	1	1	1	20
OG0001705	Arginase family	IPR006035	1	1	1	1	1	1	1	1	1	1	1	1	1	1	1	1	2	1	1	20
OG0001706	Helicase conserved C-terminal domain	IPR001650	1	1	1	1	1	2	1	1	1	1	1	1	1	1	1	1	1	1	1	20
OG0001707	Inorganic pyrophosphatase	IPR008162	2	1	1	1	1	1	1	1	1	1	1	1	1	1	1	1	1	1	1	20
OG0001708	Major Facilitator Superfamily	IPR011701	2	1	1	1	1	1	1	1	1	1	1	1	1	1	1	1	1	1	1	20
OG0001709	Protein of unknown function (DUF2985)	IPR021369	1	1	1	1	2	1	1	1	1	1	1	1	1	1	1	1	1	1	1	20
OG0001710	Endoplasmic Reticulum Oxidoreductin 1 (ERO1)	IPR007266	2	1	1	1	2	1	1	1	1	1	1	1	1	1	1	1	1	1	0	20
OG0001711	Mpv17 / PMP22 family	IPR007248	2	1	1	1	1	1	1	1	1	1	1	1	1	1	1	1	1	1	1	20
OG0001712	Enoyl-CoA hydratase/isomerase	IPR001753	1	2	1	1	1	1	1	1	1	1	1	1	1	1	1	1	1	1	1	20
OG0001713	JmjC domain, hydroxylase	IPR003347	2	1	1	1	1	1	1	1	1	1	1	1	1	1	1	1	1	1	1	20
OG0001714	RWD domain	IPR006575	1	1	1	1	1	2	1	1	1	1	1	1	1	1	1	1	1	1	1	20
OG0001715	Beta-lactamase	IPR001466	1	1	1	1	1	1	1	1	1	1	1	1	1	1	1	2	1	1	1	20
OG0001716	Pyruvate/Phosphoenolpyruvate kinase	IPR001487|IPR005000|IPR015813|IPR036427|IPR040442	4	1	1	1	1	0	0	0	0	0	0	2	2	2	2	2	0	2	0	20
OG0001717	BTB/POZ domain	IPR000210	1	1	1	1	2	1	1	1	1	1	1	1	1	1	1	1	1	1	1	20
OG0001718	Utp25, U3 small nucleolar RNA-associated SSU processome protein 25	IPR010678	2	1	1	1	1	1	1	1	1	1	1	1	1	1	1	1	1	1	1	20
OG0001719	Transcription initiation factor IID, 18kD subunit	IPR003195	1	1	1	1	1	2	1	1	1	1	1	1	1	1	1	1	1	1	1	20
OG0001720	Nuclear pore complex component	IPR012578	2	1	1	1	1	1	1	1	1	1	1	1	1	1	1	1	1	1	1	20
OG0001721	2Fe-2S iron-sulfur cluster binding domain		1	1	1	1	1	1	1	1	1	1	1	1	1	1	1	1	2	1	1	20
OG0001722	cwf18 pre-mRNA splicing factor	IPR013169	1	1	1	1	1	2	1	1	1	1	1	1	1	1	1	1	1	1	1	20
OG0001723	Adaptor complexes medium subunit family	IPR028565	2	1	1	1	1	1	1	1	1	1	1	1	1	1	1	1	1	1	1	20
OG0001724	GNS1/SUR4 family	IPR002076	2	1	1	1	1	1	1	1	1	1	1	1	1	1	1	1	1	1	1	20
OG0001725	LSM domain	IPR001163	1	1	1	1	2	1	1	1	1	1	0	1	1	1	1	1	2	1	1	20
OG0001726		IPR000073|IPR029058	1	0	2	1	2	0	0	0	0	0	0	2	2	2	2	2	0	2	2	20
OG0001727	ARID/BRIGHT DNA binding domain	IPR001606	2	1	1	1	1	1	1	1	1	1	1	1	1	1	1	1	1	1	1	20
OG0001728	Amidase	IPR023631	1	1	1	1	1	2	1	1	1	1	1	1	1	1	1	1	1	1	1	20
OG0001729	Bacterial NAD-glutamate dehydrogenase	IPR028971	1	1	1	1	2	1	1	1	1	1	1	1	1	1	1	1	1	1	1	20
OG0001730	E2 binding domain	IPR014929	2	1	1	1	1	1	1	1	1	1	1	1	1	1	1	1	1	1	1	20
OG0001731	EF hand	IPR002048	1	1	1	1	1	2	1	1	1	1	1	1	1	1	1	1	1	1	1	20
OG0001732	Domain of unknown function (DUF1932)	IPR015814	2	1	1	1	1	1	1	1	1	1	1	1	1	1	1	1	1	1	1	20
OG0001733	PX domain	IPR001683	1	1	1	1	1	1	1	1	1	1	1	1	1	1	1	1	2	1	1	20
OG0001734	Mitochondrial carrier protein	IPR018108	1	1	1	1	2	1	1	1	1	1	1	1	1	1	1	1	1	1	1	20
OG0001735	Spinocerebellar ataxia type 10 protein domain	IPR019156	1	1	1	1	1	1	1	1	1	1	1	1	1	1	1	1	2	1	1	20
OG0001736	NAD(P)H-binding	IPR016040	1	1	1	1	2	1	1	1	1	1	1	1	1	1	1	1	1	1	1	20
OG0001737	NUDE protein, C-terminal conserved region	IPR006964	1	1	1	1	1	2	1	1	1	1	1	1	1	1	1	1	1	1	1	20
OG0001738	Allantoicase repeat	IPR015908	1	1	1	1	2	1	1	1	1	1	1	1	1	1	1	1	1	1	1	20
OG0001739	OST3 / OST6 family, transporter family	IPR021149	1	1	1	1	1	2	1	1	1	1	1	1	1	1	1	1	1	1	1	20
OG0001740	SCA7, zinc-binding domain	IPR013243	2	1	1	1	1	1	1	1	1	1	1	1	1	1	1	1	1	1	1	20
OG0001741	AMP-binding enzyme	IPR000873	2	1	1	1	1	1	1	1	1	1	1	1	1	1	1	1	1	1	1	20
OG0001742	AMP-binding enzyme	IPR000873	1	1	1	1	2	1	1	1	1	1	1	1	1	1	1	1	1	1	1	20
OG0001743	Dihydrouridine synthase (Dus)	IPR001269	2	1	1	1	1	1	1	1	1	1	1	1	1	1	1	1	1	1	1	20
OG0001744	Arginosuccinate synthase	IPR001518	1	1	1	1	2	1	1	1	1	1	1	1	1	1	1	1	1	1	1	20
OG0001745	RNA recognition motif. (a.k.a. RRM, RBD, or RNP domain)	IPR000504	1	1	1	1	1	2	1	1	1	1	1	1	1	1	1	1	1	1	1	20
OG0001746	Histone-binding protein RBBP4 or subunit C of CAF1 complex	IPR022052	1	1	1	1	1	1	1	1	1	1	1	1	1	1	1	1	2	1	1	20
OG0001747	ACT domain	IPR027795	1	1	1	1	2	1	1	1	1	1	1	1	1	1	1	1	1	1	1	20
OG0001748	BTB/POZ domain	IPR000210	1	1	1	1	2	1	1	1	1	1	1	1	1	1	1	1	1	1	1	20
OG0001749	Queuine tRNA-ribosyltransferase	IPR002616	1	1	1	1	2	1	1	1	1	1	1	1	1	1	1	1	1	1	1	20
OG0001750	Cytochrome oxidase c assembly	IPR029208	1	1	1	1	1	2	1	1	1	1	1	1	1	1	1	1	1	1	1	20
OG0001751	Ribosomal protein S5, C-terminal domain	IPR005324	1	1	1	1	2	1	1	1	1	1	1	1	1	1	1	1	1	1	1	20
OG0001752	Domain of unknown function (DUF4748)	IPR031833	1	1	1	1	2	1	1	1	1	1	1	1	1	1	1	1	1	1	1	20
OG0001753	ARP2/3 complex ARPC3 (21 kDa) subunit	IPR007204	1	1	1	1	2	1	1	1	1	1	1	1	1	1	1	1	1	1	1	20
OG0001754	Protein kinase domain	IPR000719	2	1	1	1	1	1	1	1	1	1	1	1	1	1	1	1	1	1	1	20
OG0001755	GDP dissociation inhibitor	IPR018203	1	1	1	1	1	2	1	1	1	1	1	1	1	1	1	1	1	1	1	20
OG0001756	Succinate dehydrogenase/Fumarate reductase transmembrane subunit	IPR000701	1	1	1	1	2	1	1	1	1	1	1	1	1	1	1	1	1	1	1	20
OG0001757	Protein phosphatase inhibitor 2 (IPP-2)	IPR007062	1	1	1	1	2	1	1	1	1	1	1	1	1	1	1	1	1	1	1	20
OG0001758	Plasma-membrane choline transporter	IPR007603	1	1	1	1	2	1	1	1	1	1	1	1	1	1	1	1	1	1	1	20
OG0001759	alpha/beta hydrolase fold	IPR000073	1	1	1	1	2	1	1	1	1	1	1	1	1	1	1	1	1	1	1	20
OG0001760			1	1	1	1	1	1	1	1	1	1	1	1	1	1	1	1	2	1	1	20
OG0001761	BUD22	IPR015158	1	1	1	1	1	2	1	1	1	1	1	1	1	1	1	1	1	1	1	20
OG0001762	Surfeit locus protein 5 subunit 22 of Mediator complex	IPR009332	2	1	1	1	1	1	1	1	1	1	1	1	1	1	1	1	1	1	1	20
OG0001763	Cwf15/Cwc15 cell cycle control protein	IPR006973	1	1	1	1	1	2	1	1	1	1	1	1	1	1	1	1	1	1	1	20
OG0001764	RNA polymerase Rpb5, C-terminal domain	IPR000783	1	1	1	1	1	1	1	1	1	1	1	1	1	1	1	1	2	1	1	20
OG0001765	Protein of unknown function (DUF4243)	IPR025337	1	1	1	1	1	2	1	1	1	1	1	1	1	1	1	1	1	1	1	20
OG0001766	Plant protein of unknown function (DUF946)	IPR009291	1	1	1	1	1	2	1	1	1	1	1	1	1	1	1	1	1	1	1	20
OG0001767	DNA replication complex GINS protein SLD5 C-terminus	IPR031633	1	1	1	1	1	2	1	1	1	1	1	1	1	1	1	1	1	1	1	20
OG0001768	Dynamitin		1	1	1	1	1	2	1	1	1	1	1	1	1	1	1	1	1	1	1	20
OG0001769	Calponin homology (CH) domain	IPR001715	1	1	1	1	2	1	1	1	1	1	1	1	1	1	1	1	1	1	1	20
OG0001770	Cupin superfamily (DUF985)	IPR009327	1	1	1	1	1	2	1	1	1	1	1	1	1	1	1	1	1	1	1	20
OG0001771	Chitin synthesis regulation, resistance to Congo red	IPR020999	2	1	1	1	1	1	1	1	1	1	1	1	1	1	1	1	1	1	1	20
OG0001772	NADPH2 dehydrogenase	IPR001155|IPR013785	1	1	1	3	1	0	0	0	0	0	0	2	2	1	2	2	0	2	2	20
OG0001773	FKBP-type peptidyl-prolyl cis-trans isomerase	IPR001179	1	1	1	1	2	1	1	1	1	1	1	1	1	1	1	1	1	1	1	20
OG0001774	Poly(ADP-ribose) polymerase and DNA-Ligase Zn-finger region	IPR001510	1	1	1	1	1	1	1	1	1	1	1	1	1	1	1	2	1	1	1	20
OG0001775	Hexokinase	IPR022672	2	1	1	1	1	1	1	1	1	1	1	1	1	1	1	1	1	1	1	20
OG0001776	Aminotransferase class I and II	IPR004839	1	1	1	1	1	2	1	1	1	1	1	1	1	1	1	1	1	1	1	20
OG0001777	Nitronate monooxygenase	IPR004136	1	1	1	1	1	1	1	1	1	1	1	1	1	1	1	1	2	1	1	20
OG0001778	Domain of unknown function (DUF4211)	IPR025451	1	1	1	1	2	1	1	1	1	1	1	1	1	1	1	1	1	1	1	20
OG0001779	AAA domain		2	1	1	1	1	1	1	1	1	1	1	1	1	1	1	1	1	1	1	20
OG0001780	Cytochrome C1 family	IPR002326	1	1	1	1	2	1	1	1	1	1	1	1	1	1	1	1	1	1	1	20
OG0001781	Beta-glucan synthesis-associated protein (SKN1)	IPR005629	1	1	1	1	1	2	1	1	1	1	1	1	1	1	1	1	1	1	1	20
OG0001782	Major Facilitator Superfamily	IPR011701	2	1	1	1	1	1	1	1	1	1	1	1	1	1	1	1	1	1	1	20
OG0001783	Aldo/keto reductase family	IPR023210	1	1	1	1	1	1	1	1	1	1	1	1	2	1	1	1	1	1	1	20
OG0001784	Kinesin motor domain	IPR001752	2	1	1	1	1	1	1	1	1	1	1	1	1	1	1	1	1	1	1	20
OG0001785	ERCC3/RAD25/XPB C-terminal helicase	IPR032438	2	1	1	1	1	1	1	1	1	1	1	1	1	1	1	1	1	1	1	20
OG0001786	Aminotransferase class-III	IPR005814	1	1	1	1	2	1	1	1	1	1	1	1	1	1	1	1	1	1	1	20
OG0001787	Glutamine amidotransferase domain		1	1	1	1	2	1	1	1	1	1	1	1	1	1	1	1	1	1	1	20
OG0001788	Enolase, C-terminal TIM barrel domain	IPR020810	2	1	1	1	1	1	1	1	1	1	1	1	1	1	1	1	1	1	1	20
OG0001789	DEAD/DEAH box helicase	IPR011545	2	1	1	1	1	1	1	1	1	1	1	1	1	1	1	1	1	1	1	20
OG0001790	AT hook motif	IPR017956	2	1	1	1	1	1	1	1	1	1	1	1	1	1	1	1	1	1	1	20
OG0001791	Cofilin/tropomyosin-type actin-binding protein	IPR002108	2	1	1	1	1	1	1	1	1	1	1	1	1	1	1	1	1	1	1	20
OG0001792	Nuclear pore complex scaffold, nucleoporins 186/192/205	IPR021827	1	1	1	1	1	2	1	1	1	1	1	1	1	1	1	1	1	1	1	20
OG0001793	Elongation factor G C-terminus	IPR000640	1	1	1	1	2	1	1	1	1	1	1	1	1	1	1	1	1	1	1	20
OG0001794	Aldehyde dehydrogenase family	IPR015590	2	1	1	1	1	1	1	1	1	1	1	1	1	1	1	1	1	1	1	20
OG0001795	Anaphase-promoting complex subunit 4 WD40 domain	IPR024977	1	1	1	1	2	1	1	1	1	1	1	1	1	1	1	1	1	1	1	20
OG0001796	Acyl-CoA dehydrogenase, C-terminal domain	IPR009075	1	1	1	1	1	1	1	1	1	1	2	1	1	1	1	1	1	1	1	20
OG0001797	Cyclin, C-terminal domain	IPR004367	1	1	1	1	2	1	1	1	1	1	1	1	1	1	1	1	1	1	1	20
OG0001798	Enoyl-(Acyl carrier protein) reductase		1	1	1	1	2	1	1	1	1	1	1	1	1	1	1	1	1	1	1	20
OG0001799	Shwachman-Bodian-Diamond syndrome (SBDS) protein	IPR019783	1	1	1	1	2	1	1	1	1	1	1	1	1	1	1	1	1	1	1	20
OG0001800	Beta-lactamase	IPR001466	2	1	1	1	1	1	1	1	1	1	1	1	1	1	1	1	1	1	1	20
OG0001801	Thioesterase superfamily	IPR006683	1	1	1	1	1	1	1	1	1	1	1	1	1	1	1	1	1	1	2	20
OG0001802	Glutamine synthetase, catalytic domain	IPR008146	1	1	1	1	1	2	1	1	1	1	1	1	1	1	1	1	1	1	1	20
OG0001803	XPG I-region	IPR006086	1	1	1	1	2	1	1	1	1	1	1	1	1	1	1	1	1	1	1	20
OG0001804	Taurine catabolism dioxygenase TauD, TfdA family	IPR003819	2	1	1	1	1	1	1	1	1	1	1	1	1	1	1	1	1	1	1	20
OG0001805	putative cyclase		2	3	1	1	3	0	0	0	0	0	0	1	1	1	1	1	0	2	3	20
OG0001806	hypothetical protein PV08_03411	IPR000560|IPR016274|IPR029033|IPR033379	1	2	2	2	0	0	0	0	0	0	0	2	2	2	2	2	0	2	1	20
OG0001807	Amidase	IPR023631	1	2	1	1	1	1	1	1	1	1	1	1	1	1	1	1	1	1	1	20
OG0001808	C2 domain	IPR000008	2	1	1	1	1	1	1	1	1	1	1	1	1	1	1	1	1	1	1	20
OG0001809	NAD binding domain of 6-phosphogluconate dehydrogenase	IPR006115	1	1	1	1	2	1	1	1	1	1	1	1	1	1	1	1	1	1	1	20
OG0001810	GroES-like protein	IPR002328|IPR011032|IPR013149|IPR013154|IPR020843|IPR036291	1	2	2	2	0	0	0	0	0	0	0	2	2	2	2	2	0	2	1	20
OG0001811	Arginase family	IPR006035	2	1	1	1	1	1	1	1	1	1	1	1	1	1	1	1	1	1	1	20
OG0001812	Glucanosyltransferase	IPR004886	1	1	1	1	1	2	1	1	1	1	1	1	1	1	1	1	1	1	1	20
OG0001813	Domain of unknown function (DUF3506)	IPR021894	2	1	1	1	1	1	1	1	1	1	1	1	1	1	1	1	1	1	1	20
OG0001814	DSBA-like thioredoxin domain	IPR001853	1	1	1	1	1	2	1	1	1	1	1	1	1	1	1	1	1	1	1	20
OG0001815	Amylo-alpha-1,6-glucosidase	IPR032790	1	1	1	1	2	1	1	1	1	1	1	1	1	1	1	1	1	1	1	20
OG0001816	4F5 protein family	IPR007513	1	1	1	1	1	1	1	1	1	1	1	1	1	1	1	1	2	1	1	20
OG0001817	Domain of unknown function (DUF4396)	IPR025509	1	1	1	1	2	1	1	1	1	1	1	1	1	1	1	1	1	1	1	20
OG0001818	Histidine kinase-, DNA gyrase B-, and HSP90-like ATPase		1	1	1	1	1	2	1	1	1	1	1	1	1	1	1	1	1	1	1	20
OG0001819	Pyridine nucleotide-disulphide oxidoreductase	IPR023753	1	1	1	1	2	1	1	1	1	1	1	1	1	1	1	1	1	1	1	20
OG0001820	His Kinase A (phospho-acceptor) domain	IPR003661	2	1	1	1	1	1	1	1	1	1	1	1	1	1	1	1	1	1	1	20
OG0001821	Ssu72-like protein	IPR006811	1	1	1	1	1	1	1	1	1	1	1	1	1	1	1	1	2	1	1	20
OG0001822	CBS domain	IPR000644	1	1	1	1	2	1	1	1	1	1	1	1	1	1	1	1	1	1	1	20
OG0001823	Killer toxin-resistance protein 1	IPR031452	2	1	1	1	1	1	1	1	1	1	1	1	1	1	1	1	1	1	1	20
OG0001824	Clr5 domain	IPR025676	1	1	1	1	1	2	1	1	1	1	1	1	1	1	1	1	1	1	1	20
OG0001825	NUBPL iron-transfer P-loop NTPase	IPR033756	1	1	1	1	1	2	1	1	1	1	1	1	1	1	1	1	1	1	1	20
OG0001826	MFS general substrate transporter	IPR011701|IPR020846|IPR036259	1	1	2	2	2	0	0	0	0	0	0	2	2	2	1	3	0	1	1	20
OG0001827	Dual specificity phosphatase, catalytic domain	IPR000340	1	1	1	1	1	2	1	1	1	1	1	1	1	1	1	1	1	1	1	20
OG0001828	Macrophage migration inhibitory factor (MIF)	IPR001398	1	1	1	1	2	1	1	1	1	1	1	1	1	1	1	1	1	1	1	20
OG0001829	Sugar (and other) transporter	IPR005828	2	1	1	1	1	1	1	1	1	1	1	1	1	1	1	1	1	1	1	20
OG0001830	Altered inheritance of mitochondria 5	IPR031463	1	2	1	1	1	1	1	1	1	1	1	1	1	1	1	1	1	1	1	20
OG0001831	Glycosyl transferases group 1	IPR001296	2	1	1	1	1	1	1	1	1	1	1	1	1	1	1	1	1	1	1	20
OG0001832	Iron permease FTR1 family	IPR004923	1	1	1	1	2	1	1	1	1	1	1	1	1	1	1	1	1	1	1	20
OG0001833	Amino acid permease	IPR002293	1	1	1	1	0	1	1	2	1	1	1	1	1	1	1	1	2	1	1	20
OG0001834	Haem-containing dehydratase	IPR025702	1	1	1	1	2	1	1	1	1	1	1	1	1	1	1	1	1	1	1	20
OG0001835	Signal peptidase subunit	IPR007653	1	1	1	1	1	1	1	1	1	1	1	1	1	1	1	1	2	1	1	20
OG0001836	Peptidase family M28	IPR007484	1	1	1	1	1	1	1	1	1	1	1	1	1	1	1	1	2	1	1	20
OG0001837	Cysteine dioxygenase type I	IPR010300	1	1	1	1	1	2	1	1	1	1	1	1	1	1	1	1	1	1	1	20
OG0001838	Cytochrome c oxidase subunit VIIc	IPR004202	1	1	1	1	1	1	1	1	1	1	2	1	1	1	1	1	1	1	1	20
OG0001839	Fungal specific transcription factor domain	IPR007219	2	1	1	1	1	1	1	1	1	1	1	1	1	1	1	1	1	1	1	20
OG0001840	RINT-1 / TIP-1 family	IPR007528	1	1	1	1	1	1	1	1	1	1	1	1	1	1	1	1	2	1	1	20
OG0001841	Hydroxymethylglutaryl-coenzyme A synthase C terminal	IPR013746	1	1	1	1	2	1	1	1	1	1	1	1	1	1	1	1	1	1	1	20
OG0001842	Isochorismatase family	IPR000868	2	1	1	1	1	1	1	1	1	1	1	1	1	1	1	1	1	1	1	20
OG0001843	Transcription factor IIA, alpha/beta subunit	IPR004855	1	1	1	1	2	1	1	1	1	1	1	1	1	1	1	1	1	1	1	20
OG0001844	Fungal specific transcription factor domain	IPR021858	1	1	1	1	2	1	1	1	1	1	1	1	1	1	1	1	1	1	1	20
OG0001845	Ubiquitin-2 like Rad60 SUMO-like	IPR022617	1	1	1	1	1	2	1	1	1	1	1	1	1	1	1	1	1	1	1	20
OG0001846	Utp13 specific WD40 associated domain	IPR013934	1	1	1	1	1	2	1	1	1	1	1	1	1	1	1	1	1	1	1	20
OG0001847	G-patch domain	IPR026822	2	1	1	1	1	1	1	1	1	1	1	1	1	1	1	1	1	1	1	20
OG0001848	ATPase family associated with various cellular activities (AAA)	IPR003959	2	1	1	1	1	1	1	1	1	1	1	1	1	1	1	1	1	1	1	20
OG0001849	Carboxymuconolactone decarboxylase family	IPR003779	1	1	1	1	2	1	1	1	1	1	1	1	1	1	1	1	1	1	1	20
OG0001850	Kinesin motor domain	IPR001752	1	1	1	1	1	2	1	1	1	1	1	1	1	1	1	1	1	1	1	20
OG0001851	Aminotransferase class I and II	IPR004839	1	1	2	1	1	1	1	1	1	1	1	1	1	1	1	1	1	1	1	20
OG0001852	Sodium Bile acid symporter family	IPR002657	2	1	1	1	1	1	1	1	1	1	1	1	1	1	1	1	1	1	1	20
OG0001853	Acetyltransferase (GNAT) family	IPR000182	1	1	1	1	2	1	1	1	1	1	1	1	1	1	1	1	1	1	1	20
OG0001854	Major Facilitator Superfamily	IPR011701	1	1	1	1	2	1	1	1	1	1	1	1	1	1	1	1	1	1	1	20
OG0001855	FAD-binding domain	IPR013112	1	1	1	1	2	1	1	1	1	1	1	1	1	1	1	1	1	1	1	20
OG0001856	AMP-binding enzyme	IPR000873	2	1	1	1	1	1	1	1	1	1	1	1	1	1	1	1	1	1	1	20
OG0001857	Permease family	IPR006043	2	1	1	1	1	1	1	1	1	1	1	1	1	1	1	1	1	1	1	20
OG0001858	Enoyl-(Acyl carrier protein) reductase		1	1	1	1	2	1	1	1	1	1	1	1	1	1	1	1	1	1	1	20
OG0001859	Sel1 repeat	IPR006597	2	1	1	1	1	1	1	1	1	1	1	1	1	1	1	1	1	1	1	20
OG0001860	Prp31 C terminal domain	IPR019175	1	1	1	1	1	1	1	1	1	1	1	1	1	1	1	1	2	1	1	20
OG0001861	Chromo (CHRromatin Organisation MOdifier) domain	IPR023780	2	1	1	1	1	1	1	1	1	1	1	1	1	1	1	1	1	1	1	20
OG0001862	Mago nashi protein	IPR004023	1	1	1	1	1	2	1	1	1	1	1	1	1	1	1	1	1	1	1	20
OG0001863	Conserved region of Rad21 / Rec8 like protein	IPR006909	2	1	1	1	1	1	1	1	1	1	1	1	1	1	1	1	1	1	1	20
OG0001864	Protein phosphatase 2C	IPR001932	2	1	1	1	1	1	1	1	1	1	1	1	1	1	1	1	1	1	1	20
OG0001865	Fungal specific transcription factor domain	IPR007219	2	1	1	1	1	1	1	1	1	1	1	1	1	1	1	1	1	1	1	20
OG0001866	Fungal specific transcription factor domain	IPR007219	1	1	1	1	3	1	1	1	1	1	1	1	1	1	1	1	1	1	0	20
OG0001867	Dihydroorotate dehydrogenase	IPR005720	1	1	1	1	1	1	1	1	1	1	1	1	1	1	1	1	2	1	1	20
OG0001868	Isochorismatase family	IPR000868	2	1	1	1	1	1	1	1	1	1	1	1	1	1	1	1	1	1	1	20
OG0001869	Mitochondrial small ribosomal subunit Rsm22	IPR015324	1	1	1	1	1	2	1	1	1	1	1	1	1	1	1	1	1	1	1	20
OG0001870	2-oxoacid dehydrogenases acyltransferase (catalytic domain)	IPR001078	1	1	1	1	1	1	1	1	1	1	1	1	1	1	1	2	1	1	1	20
OG0001871	Myo-inositol oxygenase	IPR007828	2	1	1	1	1	1	1	1	1	1	1	1	1	1	1	1	1	1	1	20
OG0001872	Hsp20/alpha crystallin family	IPR002068	1	1	1	1	2	1	1	1	1	1	1	1	1	1	1	1	1	1	1	20
OG0001873	Cation transport ATPase (P-type)		1	1	1	1	2	1	1	1	1	1	1	1	1	1	1	1	1	1	1	20
OG0001874	Major Facilitator Superfamily	IPR011701	1	1	1	1	1	1	1	1	1	1	1	1	1	1	1	2	1	1	1	20
OG0001875	14-3-3 protein	IPR023410	2	1	1	1	1	1	1	1	1	1	1	1	1	1	1	1	1	1	1	20
OG0001876	Ataxin 2 SM domain	IPR025852	2	1	1	1	1	1	1	1	1	1	1	1	1	1	1	1	1	1	1	20
OG0001877	G-patch domain	IPR000467	1	1	1	1	1	1	1	1	1	1	1	1	1	1	1	1	2	1	1	20
OG0001878	ADP-ribosylation factor family	IPR006689	2	1	1	1	0	1	1	1	1	1	1	1	1	1	1	1	1	1	2	20
OG0001879	Hsp20/alpha crystallin family	IPR002068	2	1	1	1	1	1	1	1	1	1	1	1	1	1	1	1	1	1	1	20
OG0001880	HIRA B motif	IPR019015	1	1	1	1	2	1	1	1	1	1	1	1	1	1	1	1	1	1	1	20
OG0001881	MFS sugar transporter	IPR003663|IPR005828|IPR005829|IPR020846|IPR036259	3	1	1	1	1	0	0	0	0	0	0	2	2	2	2	2	0	2	1	20
OG0001882	FAT domain	IPR003151	1	1	1	1	1	1	1	1	1	1	1	2	1	1	1	1	1	1	1	20
OG0001883	JAB1/Mov34/MPN/PAD-1 ubiquitin protease	IPR000555	2	1	1	1	1	1	1	1	1	1	1	1	1	1	1	1	1	1	1	20
OG0001884	Cytochrome oxidase complex assembly protein 1	IPR014807	1	1	1	1	1	1	1	1	1	1	1	1	1	1	1	1	2	1	1	20
OG0001885	OPT oligopeptide transporter protein	IPR004813	1	1	1	1	2	1	1	1	1	1	1	1	1	1	1	1	1	1	1	20
OG0001886	Complex 1 protein (LYR family)	IPR008011	2	1	1	1	1	1	1	1	1	1	1	1	1	1	1	1	1	1	1	20
OG0001887	Major Facilitator Superfamily	IPR011701	3	1	1	1	0	1	1	1	1	1	1	1	1	1	1	1	1	1	1	20
OG0001888	Saccharopine dehydrogenase	IPR001138|IPR005097|IPR036291|IPR036864	1	2	2	2	1	0	0	0	0	0	0	2	2	2	2	2	0	2	0	20
OG0001889	Mur ligase middle domain	IPR013221	1	1	1	1	1	2	1	1	1	1	1	1	1	1	1	1	1	1	1	20
OG0001890	Glutaredoxin-like domain (DUF836)	IPR008554	1	1	1	1	1	1	1	1	1	1	1	1	1	1	1	1	2	1	1	20
OG0001891	CoA-transferase family III	IPR003673	1	1	1	1	1	1	1	1	1	1	1	1	1	1	1	1	2	1	1	20
OG0001892	Amino-transferase class IV	IPR001544	1	1	1	1	2	1	1	1	1	1	1	1	1	1	1	1	1	1	1	20
OG0001893	Asparagine synthase	IPR001962	1	1	2	1	1	1	1	1	1	1	1	1	1	1	1	1	1	1	1	20
OG0001894	HIT domain	IPR001310	1	1	1	1	1	2	1	1	1	1	1	1	1	1	1	1	1	1	1	20
OG0001895	Helix-loop-helix DNA-binding domain	IPR011598	1	1	1	1	2	1	1	1	1	1	1	1	1	1	1	1	1	1	1	20
OG0001896	Mitochondrial carrier protein	IPR018108	1	1	1	1	2	1	1	1	1	1	1	1	1	1	1	1	1	1	1	20
OG0001897	Fungal specific transcription factor domain	IPR007219	2	1	1	1	1	1	1	1	1	1	1	1	1	1	1	1	1	1	1	20
OG0001898	Cytidylyltransferase-like	IPR004821	2	1	1	1	1	1	1	1	1	1	1	1	1	1	1	1	1	1	1	20
OG0001899	Zinc-finger double-stranded RNA-binding	IPR022755	1	1	1	1	1	2	1	1	1	1	1	1	1	1	1	1	1	1	1	20
OG0001900	Protein of unknown function (DUF3405)	IPR021822	1	1	1	1	1	2	1	1	1	1	1	1	1	1	1	1	1	1	1	20
OG0001901	Glycosyl hydrolases family 17	IPR000490	1	1	1	1	1	2	1	1	1	1	1	1	1	1	1	1	1	1	1	20
OG0001902	PHD-finger	IPR019787	1	1	1	1	1	2	1	1	1	1	1	1	1	1	1	1	1	1	1	20
OG0001903	Ribosomal protein S11	IPR001971	1	1	1	1	1	2	1	1	1	1	1	1	1	1	1	1	1	1	1	20
OG0001904	Beta-lactamase	IPR001466	1	1	1	1	1	1	1	1	1	1	1	1	1	1	1	1	1	1	2	20
OG0001905	D-isomer specific 2-hydroxyacid dehydrogenase, catalytic domain	IPR006139	1	1	1	1	1	2	1	1	1	1	1	1	1	1	1	1	1	1	1	20
OG0001906	HAD-hyrolase-like		1	1	1	1	1	2	1	1	1	1	1	1	1	1	1	1	1	1	1	20
OG0001907	Pyridine nucleotide-disulphide oxidoreductase		2	1	1	1	1	1	1	1	1	1	1	1	1	1	1	1	1	1	1	20
OG0001908	Anticodon binding domain	IPR004154	1	1	1	1	2	1	1	1	1	1	1	1	1	1	1	1	1	1	1	20
OG0001909	Acetyltransferase (GNAT) family	IPR000182	1	1	1	1	1	2	1	1	1	1	1	1	1	1	1	1	1	1	1	20
OG0001910	Amidohydrolase	IPR006680	1	1	1	1	1	1	1	1	1	1	2	1	1	1	1	1	1	1	1	20
OG0001911	ADP-ribosylation factor family	IPR006689	1	1	1	1	2	1	1	1	1	1	1	1	1	1	1	1	1	1	1	20
OG0001912	Methyltransferase domain		1	1	1	1	1	1	1	1	1	1	1	1	1	1	1	1	1	1	2	20
OG0001913	DEAD/DEAH box helicase	IPR011545	1	1	1	1	1	2	1	1	1	1	1	1	1	1	1	1	1	1	1	20
OG0001914	Casein kinase II regulatory subunit	IPR000704	2	1	1	1	1	1	1	1	1	1	1	1	1	1	1	1	1	1	1	20
OG0001915	Flavin-binding monooxygenase-like	IPR020946	1	1	1	1	1	1	1	1	1	1	1	1	1	1	1	2	1	1	1	20
OG0001916	G-patch domain	IPR000467	1	1	1	1	1	2	1	1	1	1	1	1	1	1	1	1	1	1	1	20
OG0001917	Aromatic amino acid lyase	IPR001106	1	1	1	1	1	2	1	1	1	1	1	1	1	1	1	1	1	1	1	20
OG0001918	FAT domain	IPR003151	1	1	1	1	1	1	1	1	1	1	1	1	1	1	1	1	2	1	1	20
OG0001919	CoA-transferase family III	IPR003673	2	1	1	1	1	1	1	1	1	1	1	1	1	1	1	1	1	1	1	20
OG0001920	Enoyl-(Acyl carrier protein) reductase		2	1	1	1	1	1	1	1	1	1	1	1	1	1	1	1	1	1	1	20
OG0001921	Oligosaccharide biosynthesis protein Alg14 like	IPR013969	2	1	1	1	1	1	1	1	1	1	1	1	1	1	1	1	1	1	1	20
OG0001922	Arv1-like family	IPR007290	1	1	1	1	1	1	1	1	1	1	1	1	1	1	1	1	2	1	1	20
OG0001923	Phosphate transporter family	IPR001204	1	1	1	1	1	1	1	1	1	1	1	1	1	1	1	1	1	1	2	20
OG0001924	Adenosine/AMP deaminase	IPR001365	1	1	1	1	1	2	1	1	1	1	1	1	1	1	1	1	1	1	1	20
OG0001925	Snf7	IPR005024	1	1	1	1	1	2	1	1	1	1	1	1	1	1	1	1	1	1	1	20
OG0001926	NOGCT (NUC087) domain	IPR012973	1	1	1	1	1	2	1	1	1	1	1	1	1	1	1	1	1	1	1	20
OG0001927	Cyclic nucleotide-binding domain	IPR000595	1	1	1	1	2	1	1	1	1	1	1	1	1	1	1	1	1	1	1	20
OG0001928	Mak10 subunit, NatC N(alpha)-terminal acetyltransferase	IPR007244	2	1	1	1	1	1	1	1	1	1	1	1	1	1	1	1	1	1	1	20
OG0001929	BAR domain	IPR004148	2	1	1	1	1	1	1	1	1	1	1	1	1	1	1	1	1	1	1	20
OG0001930	cytochrome P450	IPR001128|IPR002401|IPR017972|IPR036396	1	2	2	2	1	0	0	0	0	0	0	2	2	2	2	2	0	2	0	20
OG0001931	short chain dehydrogenase	IPR002347	2	1	1	1	1	1	1	1	1	1	1	1	1	1	1	1	1	1	1	20
OG0001932	Alcohol dehydrogenase GroES-like domain	IPR013154	1	1	1	1	1	1	1	1	1	1	1	1	1	1	1	1	1	1	2	20
OG0001933	DEAD/DEAH box helicase	IPR011545	1	1	1	1	1	1	1	1	1	1	1	1	2	1	1	1	1	1	1	20
OG0001934	Hemerythrin HHE cation binding domain	IPR012312	2	1	1	1	1	1	1	1	1	1	1	1	1	1	1	1	1	1	1	20
OG0001935	Histidine phosphatase superfamily (branch 2)	IPR000560	2	1	1	1	2	1	1	1	1	1	0	1	1	1	1	1	1	1	1	20
OG0001936	Uncharacterized protein family UPF0029	IPR001498	1	1	1	1	1	2	1	1	1	1	1	1	1	1	1	1	1	1	1	20
OG0001937	Arrestin (or S-antigen), N-terminal domain	IPR011021	1	1	1	1	1	2	1	1	1	1	1	1	1	1	1	1	1	1	1	20
OG0001938	Major Facilitator Superfamily	IPR011701	1	1	1	1	1	1	1	1	1	1	1	1	1	1	1	1	2	1	1	20
OG0001939	Glycosyl hydrolase family 65 central catalytic domain	IPR005195	1	1	1	1	1	2	1	1	1	1	1	1	1	1	1	1	1	1	1	20
OG0001940	Nse1 non-SMC component of SMC5-6 complex	IPR011513	1	1	1	1	1	2	1	1	1	1	1	1	1	1	1	1	1	1	1	20
OG0001941	Cytochrome P450	IPR001128	1	1	1	1	1	1	1	1	1	1	1	1	1	1	1	1	2	1	1	20
OG0001942	ATPase family associated with various cellular activities (AAA)	IPR003959	1	1	1	1	1	2	1	1	1	1	1	1	1	1	1	1	1	1	1	20
OG0001943	Ubiquitin fusion degradation protein UFD1	IPR004854	1	1	1	1	1	2	1	1	1	1	1	1	1	1	1	1	1	1	1	20
OG0001944	Survival protein SurE	IPR002828	1	1	1	1	1	2	1	1	1	1	1	1	1	1	1	1	1	1	1	20
OG0001945	CDP-alcohol phosphatidyltransferase	IPR000462	1	1	1	1	1	2	1	1	1	1	1	1	1	1	1	1	1	1	1	20
OG0001946	Helix-hairpin-helix domain		2	1	1	1	1	1	1	1	1	1	1	1	1	1	1	1	1	1	1	20
OG0001947	Dihydroorotate dehydrogenase	IPR005720	2	1	1	1	1	1	1	1	1	1	1	1	1	1	1	1	1	1	1	20
OG0001948	Aminotransferase class I and II	IPR004839	1	1	1	1	2	1	1	1	1	1	1	1	1	1	1	1	1	1	1	20
OG0001949	SNARE-complex protein Syntaxin-18 N-terminus	IPR019529	2	1	1	1	1	1	1	1	1	1	1	1	1	1	1	1	1	1	1	20
OG0001950	Abscisic acid G-protein coupled receptor	IPR025969	1	1	1	1	1	1	1	2	1	1	1	1	1	1	1	1	1	1	1	20
OG0001951	Biotin protein ligase C terminal domain	IPR003142	1	1	1	1	2	1	1	1	1	1	1	1	1	1	1	1	1	1	1	20
OG0001952	Flavin-binding monooxygenase-like	IPR020946	1	1	1	1	2	1	1	1	1	1	1	1	1	1	1	1	1	1	1	20
OG0001953	Glycosyl transferase family, a/b domain	IPR000312	1	1	1	1	2	1	1	1	1	1	1	1	1	1	1	1	1	1	1	20
OG0001954	Protein-tyrosine phosphatase	IPR000242	1	1	1	1	1	1	1	1	1	1	1	1	1	1	1	1	1	1	2	20
OG0001955	Acyl-coenzyme A:6-aminopenicillanic acid acyl-transferase	IPR005079	1	1	1	1	1	1	1	1	1	1	1	1	1	1	1	1	1	1	2	20
OG0001956	Alpha/beta hydrolase family	IPR000073	1	1	1	1	1	2	1	1	1	1	1	1	1	1	1	1	1	1	1	20
OG0001957	Gon7 family	IPR014849	1	1	1	1	2	2	1	1	1	1	1	1	1	1	1	1	1	1	0	20
OG0001958	Anaphase-promoting complex subunit 5	IPR026000	2	1	1	1	1	1	1	1	1	1	1	1	1	1	1	1	1	1	1	20
OG0001959	FAD-binding domain	IPR013112	1	1	1	1	1	1	1	1	1	1	1	1	1	1	1	1	1	1	2	20
OG0001960	GINS complex protein	IPR021151	2	1	1	1	1	1	1	1	1	1	1	1	1	1	1	1	1	1	1	20
OG0001961	Adaptin N terminal region	IPR002553	1	1	1	1	2	1	1	1	1	1	1	1	1	1	1	1	1	1	1	20
OG0001962	Mitochondrial carrier protein	IPR018108	1	2	1	1	1	1	1	1	1	1	1	1	1	1	1	1	1	1	1	20
OG0001963	Chitin synthase		1	1	1	1	1	2	1	1	1	1	1	1	1	1	1	1	1	1	1	20
OG0001964	Coenzyme A transferase	IPR004165	1	1	1	1	1	2	1	1	1	1	1	1	1	1	1	1	1	1	1	20
OG0001965	Fungal tRNA ligase phosphodiesterase domain	IPR015965	1	1	1	1	1	2	1	1	1	1	1	1	1	1	1	1	1	1	1	20
OG0001966	FAD dependent oxidoreductase	IPR006076	1	1	1	1	1	2	1	1	1	1	1	1	1	1	1	1	1	1	1	20
OG0001967	Peptidase family M13	IPR008753	1	1	1	1	2	1	1	1	1	1	1	1	1	1	1	1	1	1	1	20
OG0001968	Calcium-dependent channel, 7TM region, putative phosphate	IPR003864	1	1	1	1	2	1	1	1	1	1	1	1	1	1	1	1	1	1	1	20
OG0001969	Erg28 like protein	IPR005352	1	1	1	1	1	1	1	1	1	1	1	1	1	1	1	1	1	1	2	20
OG0001970	Adenylosuccinate synthetase	IPR001114	1	1	1	1	1	2	1	1	1	1	1	1	1	1	1	1	1	1	1	20
OG0001971	Major Facilitator Superfamily	IPR011701	1	1	1	1	1	2	1	1	1	1	1	1	1	1	1	1	1	1	1	20
OG0001972	Amino acid permease	IPR004841	1	1	1	1	1	2	1	1	1	1	1	1	1	1	1	1	1	1	1	20
OG0001973	Autophagy protein Apg9	IPR007241	1	1	1	1	2	1	1	1	1	1	1	1	1	1	1	1	1	1	1	20
OG0001974	Acid Phosphatase	IPR010036	1	1	1	1	2	1	1	1	1	1	1	1	1	1	1	1	1	1	1	20
OG0001975	Acetyltransferase (GNAT) domain	IPR000182	2	1	1	1	1	1	1	1	1	1	1	1	1	1	1	1	1	1	1	20
OG0001976	Helicase conserved C-terminal domain	IPR001650	1	1	1	1	1	2	1	1	1	1	1	1	1	1	1	1	1	1	1	20
OG0001977	Acetyl-coenzyme A synthetase N-terminus	IPR032387	1	1	1	1	2	1	1	1	1	1	1	1	1	1	1	1	1	1	1	20
OG0001978	Amino acid permease	IPR002293	3	1	1	1	2	1	1	0	1	0	1	1	1	1	1	1	0	1	2	20
OG0001979	Mitochondrial carrier protein	IPR018108	1	1	1	1	1	2	1	1	1	1	1	1	1	1	1	1	1	1	1	20
OG0001980	C2 domain	IPR000008	1	1	1	1	1	2	1	1	1	1	1	1	1	1	1	1	1	1	1	20
OG0001981	Dual specificity phosphatase, catalytic domain	IPR000340	1	1	1	1	2	1	1	1	1	1	1	1	1	1	1	1	1	1	1	20
OG0001982	Cupin-like domain		1	1	1	1	1	1	1	1	1	1	1	1	1	1	1	1	2	1	1	20
OG0001983	Signal recognition particle 14kD protein	IPR003210	1	1	1	1	1	2	1	1	1	1	1	1	1	1	1	1	1	1	1	20
OG0001984	Helicase associated domain (HA2)	IPR007502	1	1	1	1	1	2	1	1	1	1	1	1	1	1	1	1	1	1	1	20
OG0001985	Pyridine nucleotide-disulphide oxidoreductase	IPR023753	1	1	1	1	1	2	1	1	1	1	1	1	1	1	1	1	1	1	1	20
OG0001986	Aldo/keto reductase family	IPR023210	1	1	1	1	2	2	1	1	1	1	1	1	1	1	1	1	1	1	0	20
OG0001987	ATPase family associated with various cellular activities (AAA)	IPR003959	1	2	1	1	1	1	1	1	1	1	1	1	1	1	1	1	1	1	1	20
OG0001988	Gar1/Naf1 RNA binding region	IPR007504	1	1	1	1	1	2	1	1	1	1	1	1	1	1	1	1	1	1	1	20
OG0001989	Ribosomal protein S12/S23	IPR006032	2	1	1	1	1	1	1	1	1	1	1	1	1	1	1	1	1	1	1	20
OG0001990	C2HE / C2H2 / C2HC zinc-binding finger	IPR032566	1	1	1	1	1	1	1	1	1	1	2	1	1	1	1	1	1	1	1	20
OG0001991	FATC domain	IPR003152	2	1	1	1	1	1	1	1	1	1	1	1	1	1	1	1	1	1	1	20
OG0001992	SacI homology domain	IPR002013	1	1	1	1	1	1	1	1	1	1	1	1	1	1	1	1	1	2	1	20
OG0001993	Elongation factor G C-terminus	IPR000640	1	1	1	1	1	2	1	1	1	1	1	1	1	1	1	1	1	1	1	20
OG0001994	Exosome complex exonuclease RRP4 N-terminal region	IPR025721	1	1	1	1	1	2	1	1	1	1	1	1	1	1	1	1	1	1	1	20
OG0001995	Armadillo/beta-catenin-like repeat	IPR000225	1	1	1	1	2	1	1	1	1	1	1	1	1	1	1	1	1	1	1	20
OG0001996	Insulinase (Peptidase family M16)	IPR011765	1	1	1	1	2	1	1	1	1	1	1	1	1	1	1	1	1	1	1	20
OG0001997	FHA domain	IPR000253	1	1	1	1	2	1	1	1	1	1	1	1	1	1	1	1	1	1	1	20
OG0001998	ATP synthase subunit D	IPR002699	1	1	1	1	1	2	1	1	1	1	1	1	1	1	1	1	1	1	1	20
[truncated: 11,123 more rows]
